# Supplementary material for: Investigating the mechanism and origins of selectivity in palladium-catalysed carbene insertion cross-coupling reactions
Source: Royal Society of Chemistry journal article supplement (doi:10.1039/d2cy01702d), 2022-11-01
Supplement: d2cy01702d1.pdf [file d2cy01702d1.pdf]

## Electronic Supplementary Information for

# Investigating the Mechanism and Origins of Selectivity in Palladium-Catalysed Carbene Insertion Cross-Coupling Reactions

*Gavin Lennon, Christina O'Boyle, Andrew Carrick, Paul Dingwall\**

Queen's University Belfast, School of Chemistry and Chemical Engineering, David Kier Building, Stranmillis Road, Belfast, Antrim, BT7 1NN.

### Contents

|                                                                                    |    |
|------------------------------------------------------------------------------------|----|
| Experimental .....                                                                 | 3  |
| General Information .....                                                          | 3  |
| Synthesis of $\alpha$ -Arylphosphazine Ester (7).....                              | 4  |
| Synthesis of Carbomethoxybenzylidenephosphorane (8) .....                          | 5  |
| Purity of $\text{Pd}_2(\text{dba})_3 \cdot \text{CHCl}_3$ .....                    | 5  |
| Model Reaction Optimization .....                                                  | 7  |
| Side-Reactions, By-Products, and Spectator Species .....                           | 9  |
| Cyclopropanation of Toluene .....                                                  | 9  |
| Identification of an Insoluble Phosphonium Salt (9) By-Product .....               | 9  |
| Phosphonium Salt (9) Decomposition under Standard Conditions.....                  | 11 |
| Reactivity of Phosphorane (8) under Standard Conditions .....                      | 11 |
| Kinetic Analysis .....                                                             | 13 |
| General Procedure for Kinetic Profiling Experiments .....                          | 13 |
| $^1\text{H}$ NMR Repeatability .....                                               | 13 |
| Palladium Precursors .....                                                         | 15 |
| Following Phosphonium Salt (9) Formation By $^1\text{H}$ NMR.....                  | 15 |
| Same Excess Study - Order in $\text{Pd}_2(\text{dba})_3 \cdot \text{CHCl}_3$ ..... | 16 |
| Different Excess Studies.....                                                      | 20 |
| Orders During Induction Period .....                                               | 22 |
| Different Excess Studies at Lower Pd Loading.....                                  | 22 |
| Integral Rate Data.....                                                            | 24 |
| Spectroscopic Analysis .....                                                       | 32 |

|                                                                            |    |
|----------------------------------------------------------------------------|----|
| General Experimental Procedure for NMR Experiments .....                   | 32 |
| Example Online NMR Analysis .....                                          | 32 |
| Product Re-Insertion Experiments .....                                     | 37 |
| NMR Spectra of Novel/Uncolourised Compounds .....                          | 38 |
| Mass Spectrometry Analysis of Reaction Mixture .....                       | 43 |
| General Procedure for Mass Spectrometry Analysis of Reaction Mixture ..... | 43 |
| High Resolution Mass Spectra .....                                         | 44 |
| Computational Details.....                                                 | 48 |
| Computational Methods .....                                                | 48 |
| Carbene Trans to Br.....                                                   | 49 |
| Carbene Intermediate Int-4 Dispersion Effects .....                        | 50 |
| Computational vs Experimental Selectivities.....                           | 51 |
| c $\beta$ -H Elimination TS5-6( <i>E</i> ) Dispersion Effects .....        | 51 |
| Cartesian Coordinates .....                                                | 52 |
| Starting Materials and Products.....                                       | 52 |
| Shared Pathway .....                                                       | 55 |
| Productive (Trans PPh <sub>3</sub> ) ( <i>E</i> )-Pathway .....            | 61 |
| Productive (Trans PPh <sub>3</sub> ) ( <i>Z</i> )-Pathway .....            | 68 |
| Unproductive (Trans Br) ( <i>E</i> )-Pathway .....                         | 76 |
| Unproductive (Trans Br) ( <i>Z</i> )-Pathway .....                         | 82 |
| References .....                                                           | 90 |

## Experimental

### General Information

Unless stated otherwise, all chemicals were used as received. Petroleum ether was distilled prior to use. Acetonitrile, hexane, and methanol were HPLC grade. Commercially-sourced  $\text{Pd}_2(\text{dba})_3 \cdot \text{CHCl}_3$  was recrystallized according to literature procedure prior to use.<sup>1</sup> Benzyl bromide was filtered through a plug of silica and eluted in hexane prior to use. *p*-Acetamidobenzenesulfonyl azide was recrystallized from a binary toluene/dichloromethane solvent system. All reaction solvents were dried over activated 3 Å molecular sieves and stored under an inert  $\text{N}_2$  atmosphere 24 h prior to use. *N,N*-Diisopropylethylamine (DIPEA) was dried over activated 3 Å molecular sieves and stored under an inert  $\text{N}_2$  atmosphere at least 24 h prior to use if received in Sure-Seal containment. *N,N*-Diisopropylethylamine that was received without Sure-Seal containment was distilled over ninhydrin at atmospheric pressure, redistilled over powdered KOH under inert atmosphere at atmospheric pressure, then dried over 3 Å molecular sieves under an inert  $\text{N}_2$  atmosphere at least 24 h prior to use. In the synthesis of  $\text{Pd}_2(\text{dba})_3 \cdot \text{CHCl}_3$ , the chloroform solvent was washed with distilled water, dried over anhydrous magnesium sulfate, filtered, stored over activated 3 Å molecular sieves under an inert  $\text{N}_2$  atmosphere, and refrigerated in the absence of light at least 24 h prior to use. All palladium precursors and phosphines were stored under an inert  $\text{N}_2$  atmosphere when not in use. All glassware used in air/moisture sensitive reactions was oven-dried at 180 °C for 24 h prior to use. Equipment that was not suited for drying at 180 °C was instead dried at 60 °C for 24 h prior to use. Methyl phenyldiazoacetate (**1**),<sup>2</sup>  $\text{Pd}_2(\text{dba})_3 \cdot \text{CHCl}_3$ ,<sup>1</sup> benzyltriphenylphosphonium bromide (**9**),<sup>3</sup> (*E*)-1,2-diphenylmethylacrylate (**5E**),<sup>2</sup> (*Z*)-1,2-diphenylmethylacrylate (**5Z**),<sup>4</sup> methyl-2-diazo-4-phenylbutanoate (**3**),<sup>5</sup> bis(triphenylphosphine)palladium(II)benzyl bromide (**6**),<sup>2</sup> carbomethoxybenzylidenephosphorane (**8**),<sup>6</sup> and ethyl 2-diazo-2-(4-trifluoromethylphenyl)acetate (**10**)<sup>7</sup> were synthesised and purified according to their respective literature procedures. Unless stated otherwise, the spectral data of all known compounds were in agreement with their literature data.

Flash column chromatography was performed using Fluorochem 40-63 micron silica gel. Thin-layer chromatography was performed using Merck Kieselgel 230-400 mesh silica gel plates and visualized under UV light or by staining with permanganate solution.

<sup>1</sup>H, <sup>13</sup>C, and <sup>31</sup>P NMR analyses were conducted using 400 MHz and 600 MHz Bruker Avance series spectrometers and spectral data was analysed using Bruker TopSpin 4.0 or Mestrenova 11.0 software. Chemical shifts ( $\delta$ ) are quoted in parts per million (ppm), coupling constants (*J*) in Hertz (Hz), and measured against trimethylsilane (TMS), residual chloroform ( $\text{CHCl}_3$ ), or 1,3,5-trimethoxybenzene as an internal standard. The <sup>1</sup>H NMR spectra are reported as follows: chemical shift (number of protons, multiplicity, coupling constant). Multiplicity is abbreviated as follows: s = singlet, br = broad, d = doublet, t = triplet, q = quartet, m = multiplet. The <sup>13</sup>C spectra are reported as follows: chemical shift. <sup>31</sup>P spectra are reported as follows: chemical shift (multiplicity).

GC-FID analysis was conducted using an Agilent 7820A gas chromatography system and an Agilent 19091J-413HP-5 column. The effluent was combusted in a  $\text{H}_2$ /air flame and detected via flame ionization detection. Chromatographic data was analysed using Agilent OpenLabs software.

LC-MS analysis was conducted using an Agilent 1260 HPLC, with an Agilent Infinitylab poroshell 120 column (2.1 x 150 mm, 2.7  $\mu$ ) and tandem MSD single quadrupole mass spectrometer. Samples were analysed under either an acetonitrile/H<sub>2</sub>O gradient with 0.1% formic acid additive.

Infra-red (IR) analysis was conducted using an Agilent Cary 630 spectrometer equipped with an attenuated total reflectance (ATR) probe. Solid samples were deposited on the ATR directly. Only selected maximum absorbances ( $\nu_{\max}$ ) of the most intense peaks are reported and quoted in wavenumber ( $\text{cm}^{-1}$ ).

Melting points were determined using a Stuart SMP10 digital melting point apparatus. Values are given in  $^{\circ}\text{C}$  and are uncorrected.

HR-MS analysis was conducted by Analytical Services and Environmental Projects (ASEP) at Queen's University Belfast on a Waters LCT Premier ToF mass spectrometer using the ESI technique in positive-ion mode. Analysis of reaction mixtures was conducted on either a Waters Xevo G2-XS QTOF or Advion Nanomate Injection mass spectrometers in positive-ion and negative-ion mode.

Single X-ray diffraction analysis was conducted using CuK $\alpha$  radiation on an Agilent Supernova diffractometer equipped with an area detector and graphite monochromator. Raw frame data were recorded using CrysAlisPRO and solved using SHELXT. Full-matrix least-squares refinement of the structures were carried out using CRYSTALS.

### Synthesis of $\alpha$ -Arylphosphazine Ester (**7**)

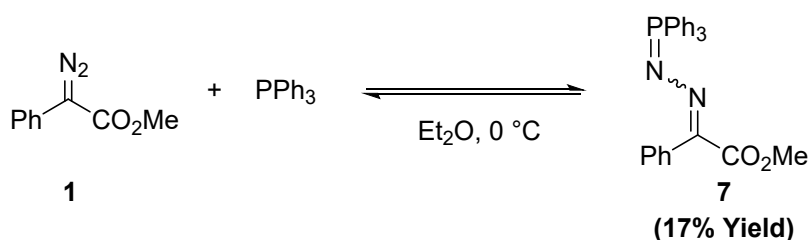

The following procedure was adopted from known protocols.<sup>8,9</sup> To an oven-dried 5 mL round-bottomed flask (RBF), PPh<sub>3</sub> (1.0 mmol) was added followed by dry Et<sub>2</sub>O and methyl phenyldiazoacetate (**1**) (1.0 mmol). The reaction mixture was submerged in an ice-bath and allowed to stir at 0 – 5  $^{\circ}\text{C}$  for 2 h. The reaction mixture was then sealed with a rubber septum pierced with a syringe and stored in a freezer for 2 – 3 weeks. The yellow precipitate was isolated *via* suction filtration and washed with Et<sub>2</sub>O (2 x 5 mL). The crude solid was then redissolved in a warm mixture of Et<sub>2</sub>O (anti-solvent) and methanol (solvent) and stored overnight in a fridge. The purified product was isolated *via* suction filtration and washed with cold Et<sub>2</sub>O (2 x 5 mL) to yield phosphazine **7** as yellow-green needle-like crystals (0.0741 g, 17% yield). NMR characterization was inconclusive as the desired product immediately reverts to a mixture of phosphazine **7**, liberated methyl phenyldiazoacetate **1**, and liberated PPh<sub>3</sub> in solution phase (see Figure S26 and Figure S27). HRMS (ESI+) found 439.1576; C<sub>27</sub>H<sub>23</sub>N<sub>2</sub>O<sub>2</sub>P, [M+H]<sup>+</sup> requires 439.1575,  $\nu_{\max}$  (neat): 1681.0, 1433.2, 1291.5, 1205.8, 1056.7, 885.2, 713.8, 687.7  $\text{cm}^{-1}$ ; m.p: 140 – 144  $^{\circ}\text{C}$ .

## Synthesis of Carbomethoxybenzylidenephosphorane (**8**)

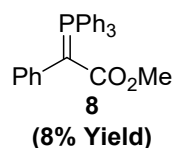

Compound **8** was synthesised and purified according to literature procedure using benzyltriphenylphosphonium bromide **9** as the starting material (1.3738 g, 8% yield).<sup>6</sup>  $\delta_H$  (600 MHz, CDCl<sub>3</sub>): 7.62 – 7.58 (6H, m), 7.50 – 7.47 (3H, m), 7.41 – 7.37 (6H, m), 7.04 – 7.02 (2H, m), 6.97-6.95 (2H, m), 6.91 – 6.88 (1H, m), 3.44 (3H, s);  $\delta_C$  (151 MHz, CDCl<sub>3</sub>): 170.14, 170.07, 137.97, 137.89, 134.38, 134.35, 133.90, 133.83, 131.63, 131.61, 128.53, 128.45, 128.01, 127.40, 127.30, 127.29, 124.16, 124.15, 49.95, 48.42, 47.58;  $\delta_P$  (243 MHz, CDCl<sub>3</sub>): 19.28 (s). HRMS (ESI+) found 411.1519 ; C<sub>27</sub>H<sub>23</sub>O<sub>2</sub>P, [M+H]<sup>+</sup> requires 411.1513;  $\nu_{max}$  (neat): 1597.2, 1481.6, 1325.1, 1237.5, 1177.8, 1097.7, 1064.2, 971.0, 773.4, 756.6, 693.3 cm<sup>-1</sup>; m.p: 159 – 161 °C (155 °C lit).<sup>10</sup>

### Purity of Pd<sub>2</sub>(dba)<sub>3</sub>·CHCl<sub>3</sub>

#### Commercial Pd<sub>2</sub>(dba)<sub>3</sub>·CHCl<sub>3</sub>

The purity of both commercially sourced and freshly prepared Pd<sub>2</sub>(dba)<sub>3</sub>·CHCl<sub>3</sub> was determined by 400 MHz <sup>1</sup>H NMR in CDCl<sub>3</sub> according to **Eq. 1** as outlined previously by Zalesskiy and Ananikov.<sup>1</sup> Integrals *I*<sub>1</sub>, *I*<sub>2</sub>, and *I*<sub>3</sub> correspond to solvated free dibenzylideneacetone, the minor form of Pd<sub>2</sub>(dba)<sub>3</sub>, and the major form of Pd<sub>2</sub>(dba)<sub>3</sub>, respectively.

$$\% \text{ Purity of the Soluble Component of Pd}_2(\text{dba})_2 \cdot \text{CHCl}_3 = \left( \frac{I_2 + I_3}{I_2 + I_3 + I_1/2} \right) \times 100 \quad (1)$$

Commercially-sourced Pd<sub>2</sub>(dba)<sub>3</sub>·CHCl<sub>3</sub> is known to possess purities lower than those advertised with a considerable portion of the material's composition being attributed to heterogeneous palladium nanoparticles.<sup>1</sup>

Accordingly, the purity of Pd<sub>2</sub>(dba)<sub>3</sub>·CHCl<sub>3</sub> obtained commercially was found to be 43% pure and as such the use of this material was avoided (Figure S1).

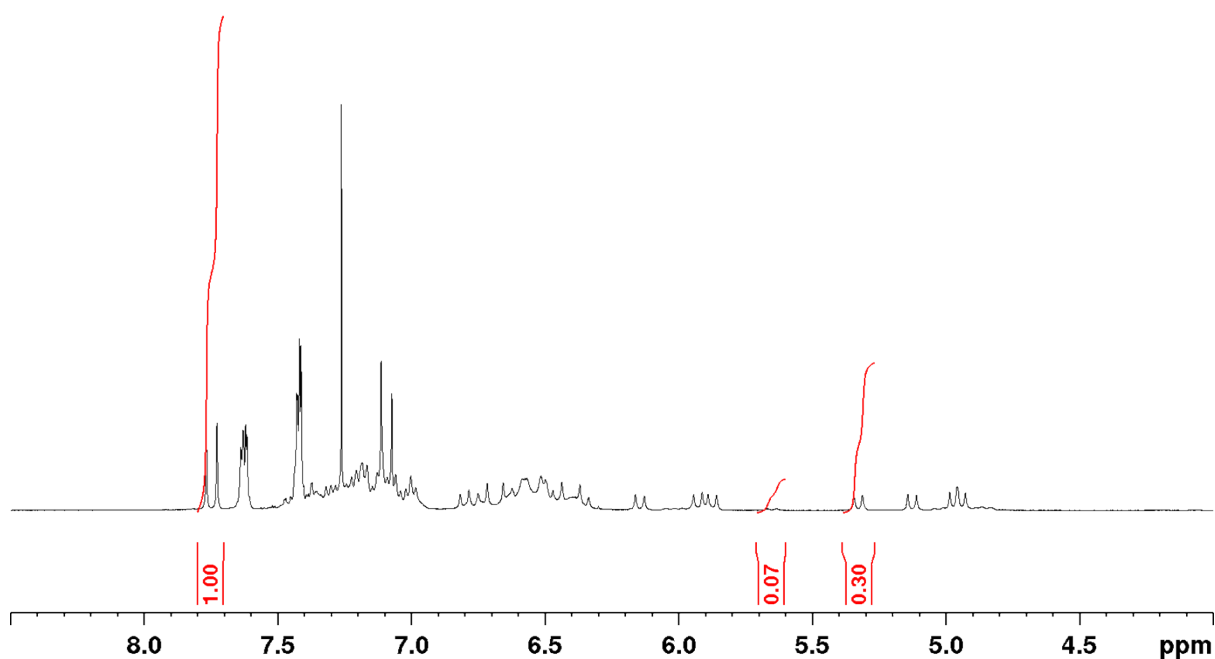

**Figure S1:** 400 MHz  $^1\text{H}$  NMR in  $\text{CDCl}_3$  of commercial  $\text{Pd}_2(\text{dba})_3\cdot\text{CHCl}_3$  as received.

### Synthesised $\text{Pd}_2(\text{dba})_3\cdot\text{CHCl}_3$

Freshly prepared  $\text{Pd}_2(\text{dba})_3\cdot\text{CHCl}_3$  was found to be 97% to 99% pure with high reproducibility (Figure S2). This material was used in the reported studies. Unless stated otherwise, reference to this materials loading in mol% refers to its uncorrected dimeric form whilst absolute concentration values refer to those of monometallic palladium in solution.

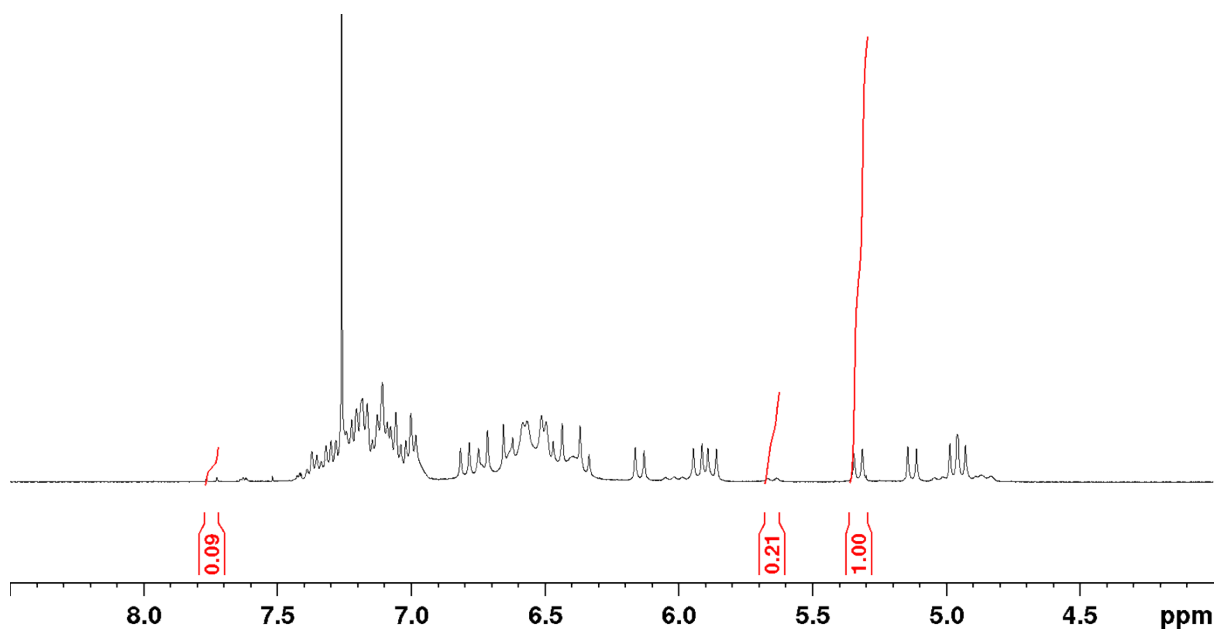

**Figure S2:** 400 MHz  $^1\text{H}$  NMR in  $\text{CDCl}_3$  of  $\text{Pd}_2(\text{dba})_3\cdot\text{CHCl}_3$  synthesised in-house.

## Model Reaction Optimization

### General Procedure

To an oven-dried microwave vial, phosphine (0.04 mmol), palladium precursor (0.005 mmol), and a known amount of internal standard was added. The vial was sealed with a crimped cap then evacuated and flushed with dry N<sub>2</sub> gas three times followed by the addition of solvent (1 mL) and base (0.4 mmol) *via* disposable syringe. The mixture was allowed to stir at 80 °C for 5 min upon which the solution turned clear gold, it was then allowed to cool to room temperature. Benzyl bromide **2** (0.1 mmol) and methyl phenyldiazoacetate **1** (0.3 mmol) were added to the reaction vessel *via* microlitre syringe and the reaction mixture was allowed to stir at 80 °C. After 3 h, an aliquot of the reaction mixture (100 μL) was extracted *via* disposable syringe and eluted through a plug of celite with diethyl ether (1 mL). Product yields were quantified *via* GC-FID analysis of the crude mixture in comparison to benzyl bromide consumption with reference to 1,3,5-trimethoxybenzene as an internal standard. Where 600 MHz <sup>1</sup>H NMR analysis of the crude reaction mixture was used, <sup>1</sup>H NMR spectra were analysed using Mestrenova 11 software with the ester methyl resonances of **5(E)** (δ 3.793 ppm, s) and **5(Z)** (δ 3.787 ppm, s) relative to the aryl proton signal of 1,3,5-trimethoxybenzene (δ 6.09 ppm, s, 3H) being used to monitor product yield and selectivity. All signals integrated were subjected to linear correction with a normalized value of 1.0000 applied to the H<sub>Aryl</sub> signal of 1,3,5-trimethoxybenzene.

**Table S1:** Ligand screen.

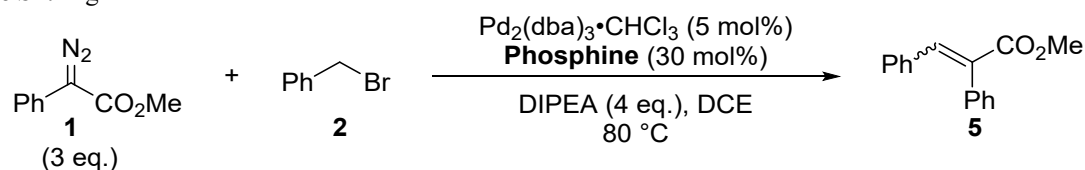

| Entry                | Phosphine                                      | Conversion <b>2</b> (%) | Yield <b>5</b> (%) | Selectivity ( <i>E</i> : <i>Z</i> ) |
|----------------------|------------------------------------------------|-------------------------|--------------------|-------------------------------------|
| <b>1</b>             | PPh <sub>3</sub>                               | 100                     | 65                 | 9:1                                 |
| <b>2</b>             | XPhos                                          | 96                      | 13                 | 7:1                                 |
| <b>3</b>             | P(C <sub>6</sub> F <sub>5</sub> ) <sub>3</sub> | 43                      | 15                 | 4:1                                 |
| <b>4</b>             | SPhos                                          | 91                      | 11                 | 8:1                                 |
| <b>5</b>             | P( <i>o</i> -tolyl) <sub>3</sub>               | 97                      | 12                 | 7:1                                 |
| <b>6</b>             | JohnPhos                                       | 78                      | 13                 | 3:1                                 |
| <b>7</b>             | CataCXium A                                    | 99                      | 2                  | 2:1                                 |
| <b>8<sup>a</sup></b> | DMPP                                           | 100                     | 2                  | 6:1                                 |

**2** (0.1 mmol), **1** (0.3 mmol), DIPEA (0.4 mmol), Pd<sub>2</sub>(dba)<sub>3</sub>·CHCl<sub>3</sub> (5 mol%), Phosphine (30 mol%), 1,3,5-Trimethoxybenzene (0.06 mmol), Dichloroethane (1 mL), 80 °C, 3 h. Conversion of benzyl bromide is based on the amount of benzyl bromide quantified at t = 0 h with reference to 1,3,5-trimethoxybenzene as an internal standard. <sup>a</sup>DMPP = Tris(2,6-dimethoxyphenyl)phosphine.

As reported in Table S1, more electron-rich phosphines which are known to favour the oxidative addition step in palladium catalysis showed no benefit to the yield of **5** when compared to PPh<sub>3</sub> (Entries 2, 4, 5, 6, 7). Similarly, bulkier phosphines, which are known to promote rapid reductive elimination,<sup>11</sup> showed no positive effect on the desired product yield when compared to PPh<sub>3</sub> (Entries 2, 4, 6, 7). These results are in agreement with the observed reaction kinetics wherein carbene formation is turnover-limiting.

**Table S2:** Solvent screen.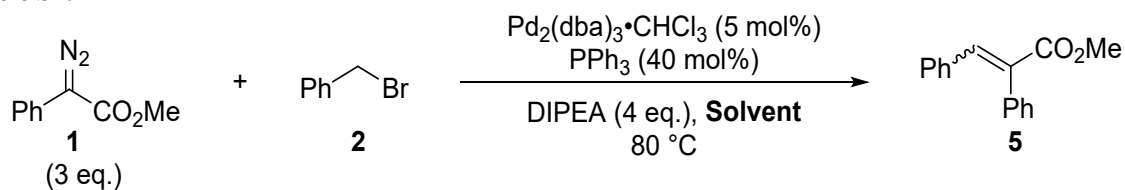

| Entry <sup>a</sup> | Solvent        | Yield <b>5</b> (%) | Selectivity ( <b>E</b> : <b>Z</b> ) |
|--------------------|----------------|--------------------|-------------------------------------|
| 1                  | 2-MeTHF        | 80                 | 21:1                                |
| 2                  | Ethyl Acetate  | 73                 | 17:1                                |
| 3                  | Acetonitrile   | 70                 | 14:1                                |
| 4                  | Cyclohexane    | 89                 | 23:1                                |
| 5                  | Toluene        | 89                 | 20:1 <sup>b</sup>                   |
| 6                  | Dichloroethane | 73                 | 13:1                                |

**2** (0.1 mmol), **1** (0.3 mmol), DIPEA (0.4 mmol),  $\text{Pd}_2(\text{dba})_3 \cdot \text{CHCl}_3$  (5 mol%),  $\text{PPh}_3$  (40 mol%), 1,3,5-Trimethoxybenzene (0.06 mmol), Solvent (3 mL),  $80^\circ\text{C}$ , 3 h. Conversion of benzyl bromide is based on the amount of benzyl bromide quantified at  $t = 0$  h with reference to 1,3,5-trimethoxybenzene as an internal standard.

<sup>a</sup>Yield and selectivity determined *via*  $^1\text{H}$  NMR analysis of the crude reaction mixture. Benzyl bromide conversions were undetermined due to loss of the substrate *via* rotary evaporation of the reaction sample prior to dissolution in  $\text{CDCl}_3$ .

<sup>b</sup>Selectivity determined *via* GC-FID due to poor **5(E)** and **5(Z)** signal resolution in the spectra obtained *via*  $^1\text{H}$  NMR analysis.

All solvents screened, with the exception of dichloroethane, showed an insoluble white solid form over the course of the reaction. Furthermore, analysis of toluene as the reaction solvent showed that toluene was a non-innocent component and partook in a cyclopropanation side-reaction with the diazo compound substrate (*vide infra*).



## Side-Reactions, By-Products, and Spectator Species

### Cyclopropanation of Toluene

When toluene was employed as the reaction solvent in the model system an impurity that was inseparable from the desired olefin ester product by means of flash column chromatography was observed. Literature data suggested that the impurity was a mixture of the regioisomeric products 2-methyl-7-phenylbicyclo[4.1.0]hepta-2,4-diene-7-carboxylate (**16**) and 3-methyl-7-phenylbicyclo[4.1.0]hepta-2,4-diene-7-carboxylate (**17**) formed from the cyclopropanation of toluene with **1** (Figure S3).<sup>12,13</sup>

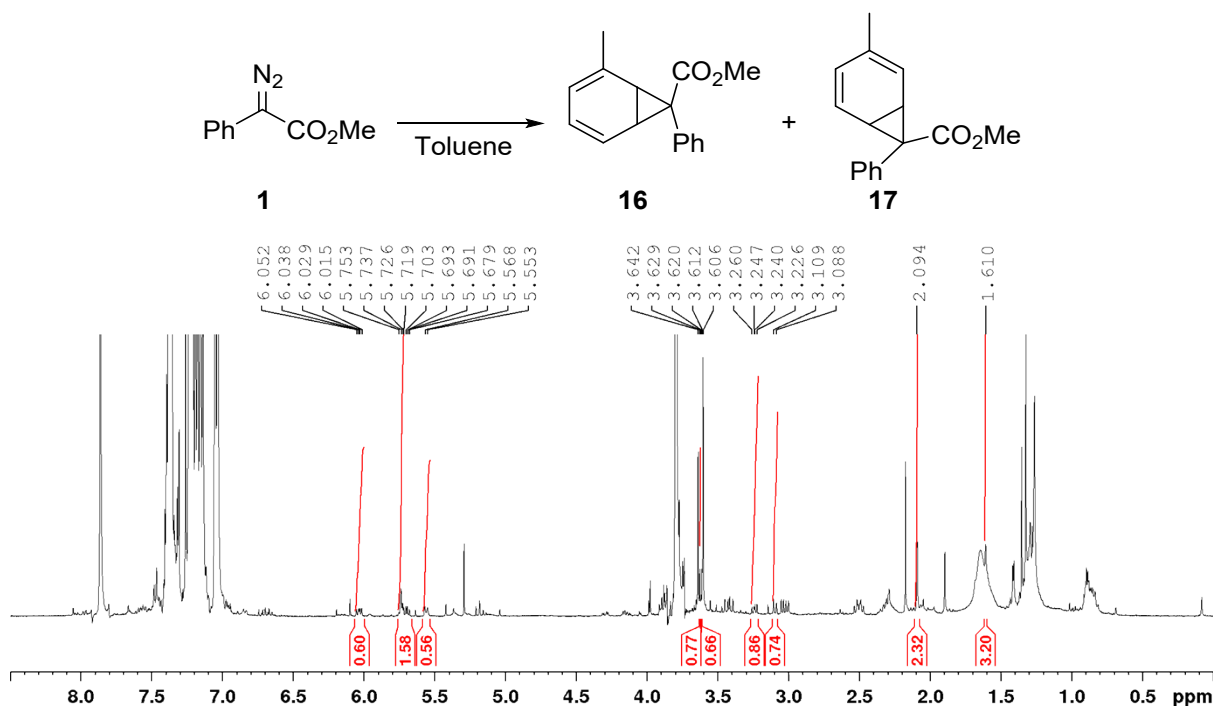

**Figure S3:** Suspected cyclopropanation side-reaction and 400 MHz <sup>1</sup>H NMR spectra in CDCl<sub>3</sub> of the **5**/impurity mixture with select characteristic signals of regioisomers **16** and **17** noted.

### Identification of an Insoluble Phosphonium Salt (**9**) By-Product

Benzyl halides are known to react with PPh<sub>3</sub> in the formation of benzyltriphenylphosphonium halide salts.<sup>14,15</sup> <sup>1</sup>H NMR analysis in CDCl<sub>3</sub> of the crude reaction mixture of the model cross-coupling system showed the presence of a characteristic methylene signal ( $\delta_{\text{H}}$  5.40, d, 2H,  $J = 14.4$  Hz) of benzyltriphenylphosphonium bromide (**9**)<sup>16</sup> with a slight downfield shift ( $\delta_{\text{H}}$  5.54, d,  $J = 14.4$  Hz) attributed to the chemical environment of the crude sample (Figure S4). The crude mixture was washed with toluene and the insoluble components recovered were analysed *via* LC/MS with the characteristic signal of the cationic moiety of **9** (*i.e.* BnPPH<sub>3</sub><sup>+</sup>) being detected (LC/MS (ESI+): found 353.15, C<sub>25</sub>H<sub>22</sub>P<sup>+</sup>, [M]<sup>+</sup> requires 353.20).

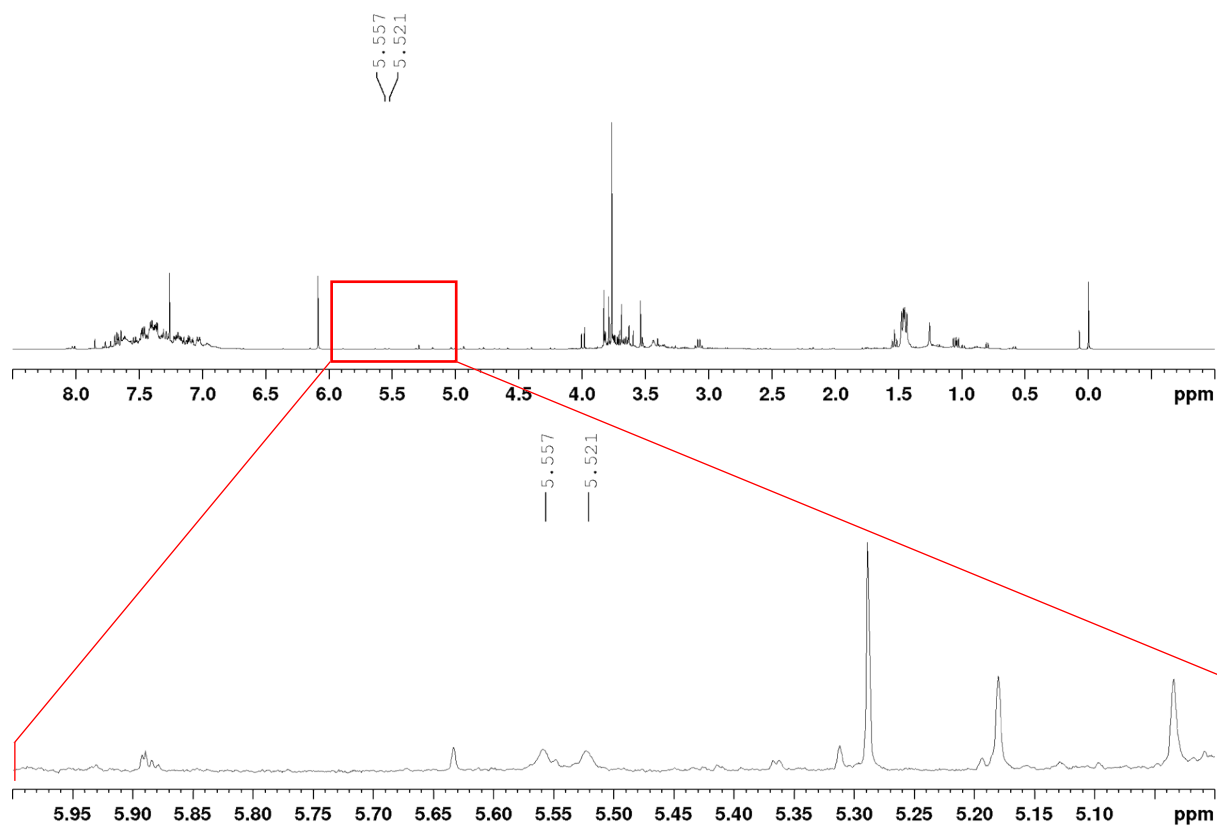

**Figure S4:** 400 MHz <sup>1</sup>H NMR spectra of the crude model reaction mixture in CDCl<sub>3</sub> (top). The same spectrum is expanded in the region of δ6.00 – 5.00 ppm to highlight the presence of **9** (bottom).

## Phosponium Salt (**9**) Decomposition under Standard Conditions

Inclusion of a phosphine source is crucial for the desired catalytic pathway as the absence of  $\text{PPh}_3$  resulted in the immediate formation of palladium black with trace amounts of product **5** being detected by  $^1\text{H}$  NMR analysis (Table S3) and no detection of product **5** *via* LC/MS analysis.

**Table S3:** Efficacy of the model reaction in the absence of phosphine and presence of **9** as the phosphine source.

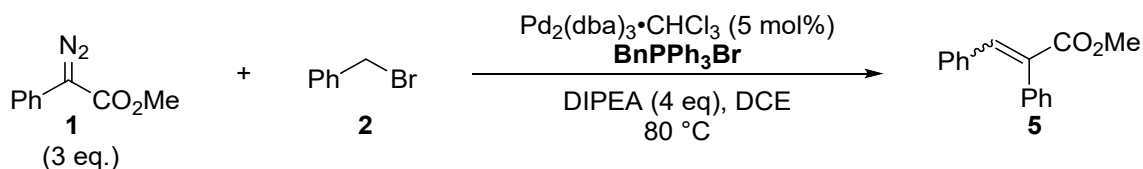

| Entry    | <b>9</b> (mmol) | <b>2</b> (mmol) | Time (h) | Yield <b>5</b> (%) <sup>a</sup> |
|----------|-----------------|-----------------|----------|---------------------------------|
| <b>1</b> | 0.00            | 0.10            | 3        | Trace                           |
| <b>2</b> | 0.00            | 0.10            | 24       | Trace                           |
| <b>3</b> | 0.04            | 0.10            | 3        | 10                              |
| <b>4</b> | 0.04            | 0.10            | 24       | 10                              |
| <b>5</b> | 0.30            | 0.00            | 3        | 6                               |
| <b>6</b> | 0.30            | 0.00            | 24       | 9                               |

**2** (0.1 mmol), **1** (0.3 mmol), DIPEA (0.4 mmol),  $\text{Pd}_2(\text{dba})_3 \cdot \text{CHCl}_3$  (5 mol%), 1,3,5-Trimethoxybenzene (0.06 mmol), Dichloroethane (1 mL),  $80^\circ\text{C}$ , 3 h.

<sup>a</sup>Yield of **5(E)**.

Reversibility of phosphonium salt formation was first investigated by utilizing **9** as the sole phosphine source under standard reaction conditions (Table S3). By  $^1\text{H}$  NMR analysis of the reaction mixture, **5(E)** was shown to form in 10% yield indicating  $\text{PPh}_3$  may be liberated from **9**. Further confidence was gained by detection of the characteristic signal of product **5** *via* LC/MS analysis (LC/MS (ESI+): found 239.10,  $\text{C}_{16}\text{H}_{14}\text{O}_2$ ,  $[\text{M}+\text{H}]^+$  requires 239.10).

To clarify that  $\text{PPh}_3$  was liberated from the phosphonium salt by virtue of reversible salt formation, **9** was used in stoichiometric amounts thus acting as the source of both **2** and  $\text{PPh}_3$  (Table S3). After 24 h the desired **5(E)** product was formed in 9% yield indicating slow reversibility of phosphonium salt formation. Further confidence was gained by detection of the characteristic signal of product **5** *via* LC/MS analysis (LC/MS (ESI+): found 239.50,  $\text{C}_{16}\text{H}_{14}\text{O}_2$ ,  $[\text{M}+\text{H}]^+$  requires 239.10).

## Reactivity of Phosphorane (**8**) under Standard Conditions

As discussed *vide infra*, phosphorane **8** was shown to form irreversibly under standard reaction conditions. Given that similar compounds have been identified as key intermediates in other metal-carbene mediated chemistry<sup>17</sup> the aptitude for olefin formation *via* **8** was investigated. Under standard cross-coupling conditions in which **1** was replaced with **8** no product **5** was detected (Table S4).

**Table S4:** Model reaction with phosphorane **8** as the carbene precursor.

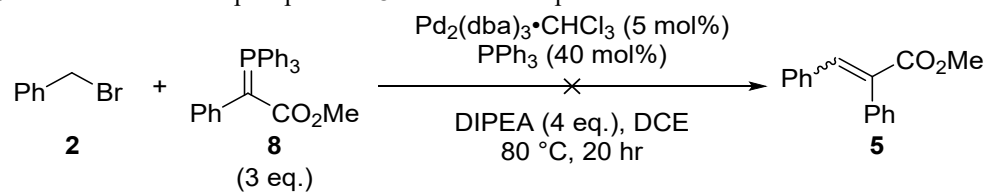

| Time (h) | Yield <b>5</b> (%) | Conversion <b>2</b> (%) | Yield <b>9</b> (%) | Conversion <b>8</b> (%) |
|----------|--------------------|-------------------------|--------------------|-------------------------|
| 20       | 0                  | 46                      | 34                 | 11                      |

**2** (0.3 mmol), **8** (0.9 mmol), DIPEA (1.2 mmol), Pd<sub>2</sub>(dba)<sub>3</sub>·CHCl<sub>3</sub> (5 mol%), PPh<sub>3</sub> (40 mol%), 1,3,5-Trimethoxybenzene (0.06 mmol), Dichloroethane (3 mL), 80 °C, 20 h. Yields and conversions determined *via* 400 MHz <sup>1</sup>H NMR analysis in CDCl<sub>3</sub> using 1,3,5-Trimethoxybenzene as an internal standard.

A minor amount of **8** was consumed over a prolonged reaction time whilst moderate consumption of **2** was observed. The majority of **2** depletion can be attributed to the formation of **9** however an amount approximately equal to that of consumed **8** was unaccounted for implying that **8** may sluggishly react with substrate **2**. Given the low conversion of **8** over a relatively long period this possible side-reaction was deemed irrelevant to the model reaction and so no further studies pertaining to this pathway were conducted. At no point was product **5** detected.

## Kinetic Analysis

Integral rate data was obtained *via* 400 MHz  $^1\text{H}$  NMR analysis using an internal standard method of quantification where 1,3,5-trimethoxybenzene was employed as the internal standard.  $^1\text{H}$  NMR spectra were analysed with the olefinic proton signal for **5(E)** ( $\delta$  7.87 ppm, s, 1H) relative to the aryl proton signal of 1,3,5-trimethoxybenzene ( $\delta$  6.09 ppm, s, 3H) being used to monitor product formation. All signals integrated were subjected to linear correction with a normalized value of 1.0000 applied to the  $\text{H}_{\text{Aryl}}$  signal of 1,3,5-trimethoxybenzene.

## General Procedure for Kinetic Profiling Experiments

To an oven-dried microwave vial, 1,3,5-trimethoxybenzene (0.06 mmol) was added. The microwave vial was sealed with a crimped cap then evacuated and flushed with dry  $\text{N}_2$  gas three times followed by the addition of an aliquot of catalyst stock solution (0.5 mL, 0.03 M  $\text{Pd}_2(\text{dba})_3\cdot\text{CHCl}_3$ , 0.24 M  $\text{PPh}_3$  in 1,2-dichloroethane, pre-activated at 80  $^\circ\text{C}$ ), 1,2-dichloroethane (2.5 mL), and DIPEA (1.2 mmol). The mixture was allowed to stir at 80  $^\circ\text{C}$  for 5 min after which stirring was ceased and the reaction mixture was allowed to cool to room temperature. **2** (0.3 mmol) and **1** (0.9 mmol) were then added to the reaction vessel and the reaction mixture was allowed to stir at 80  $^\circ\text{C}$ .

The reaction was sampled at regular time intervals using disposable 1 mL syringes sparged with dry  $\text{N}_2$  gas immediately prior to use. An aliquot of the reaction mixture (100  $\mu\text{L}$ ) was withdrawn, dispensed upon a plug of celite, and eluted with diethyl ether (1.2 mL). The sample was then concentrated *in vacuo*, re-dissolved in  $\text{CDCl}_3$  (0.6 mL) and analysed by 600 MHz or 400 MHz  $^1\text{H}$  NMR.

## $^1\text{H}$ NMR Repeatability

Following the formation of product **5(E)** *via* the olefin proton signal provided time-course data with noticeably less noise than when tracking the combined and independent methyl ester proton signals of the (*E*)/(*Z*)-**5** (Figure S5a). Comparison of time-course data obtained using 400 MHz *versus* 600 MHz NMR spectrometers showed little difference in the resulting kinetic profiles and so 400 MHz  $^1\text{H}$  NMR spectroscopy was adopted as the preferred analytical method (Figure S5b).

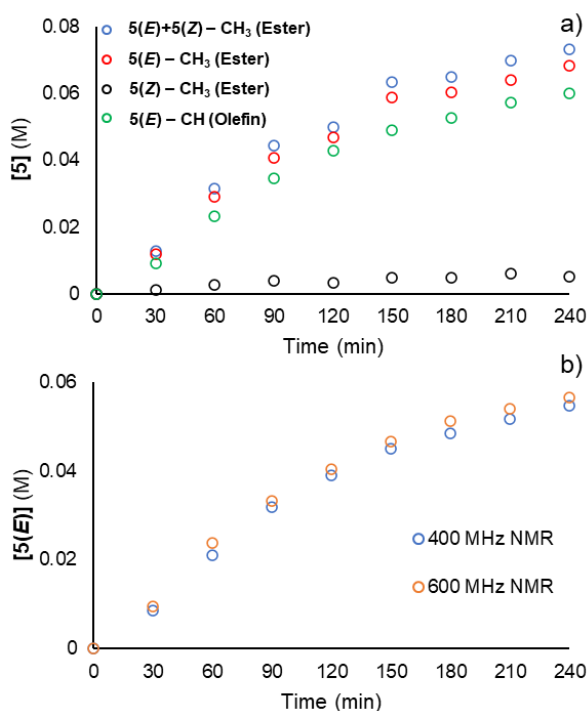

**Figure S5:** Time-course profiles for the model reaction when observing product formation using various characteristic  $^1\text{H}$  signals of the resulting (*E*)/(*Z*)-1,2-diarylacrylate **5** (a). Comparison of time-course profiles obtained from 400 MHz versus 600 MHz  $^1\text{H}$  NMR analysis (b).

The repeatability of standard reaction conditions (Table S5) was monitored across four separate experiments. As well as the standard conditions being highly repeatable (Figure S6), each of the kinetic analysis experiments were conducted with their own reference experiment at standard conditions.

**Table S5:** Standard reaction conditions for the model palladium-catalysed cross-coupling reaction.

| [2] (M) | [1] (M) | [DIPEA] (M) | [Pd <sub>2</sub> (dba) <sub>3</sub> ·CHCl <sub>3</sub> ] (M) | [PPh <sub>3</sub> ] (M) |
|---------|---------|-------------|--------------------------------------------------------------|-------------------------|
| 0.1     | 0.3     | 0.4         | 0.01                                                         | 0.04                    |

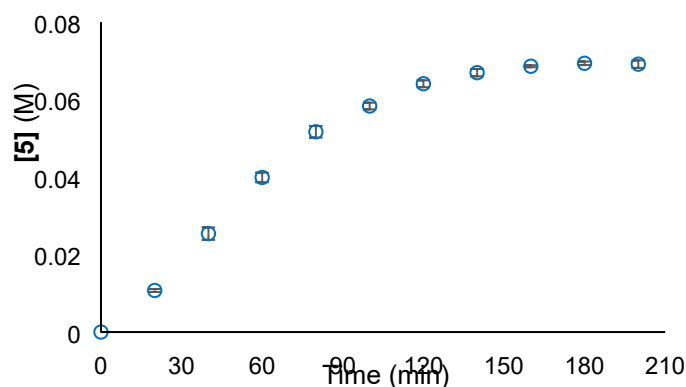

**Figure S6:** Repeatability of standard reaction conditions averaged over three independent experiments.

## Palladium Precursors

Different palladium precursors were investigated,  $\text{Pd}_2(\text{dba})_3 \cdot \text{CHCl}_3$  and  $\text{Pd}(\text{PPh}_3)_4$ , showing identical reaction profiles as well as identical induction periods, suggesting dba is not involved in the induction process (Figure S7).

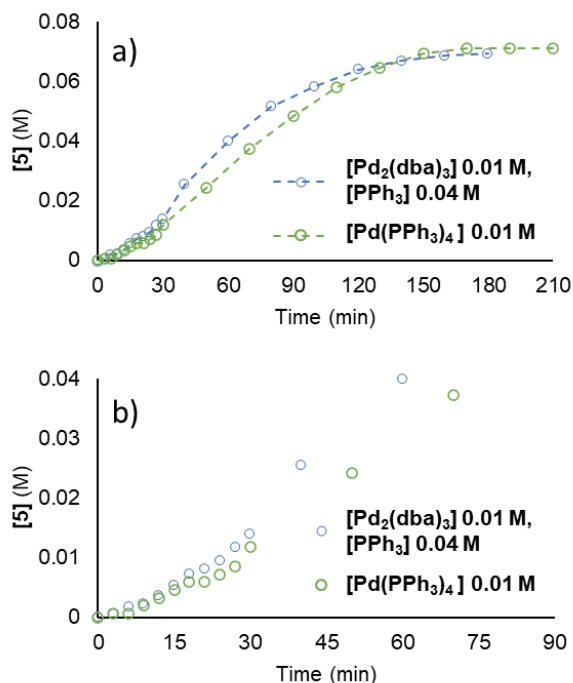

**Figure S7:** Comparison of palladium precursors  $\text{Pd}_2(\text{dba})_3$  and  $\text{Pd}(\text{PPh}_3)_4$ : a) Full time-course profile, b) induction period only.

## Following Phosphonium Salt (9) Formation By $^1\text{H}$ NMR

The phosphonium salt by-product **9** remains dissolved in dichloroethane at standard operating conditions and shows a distinct signal at 5.45 ppm (d,  $J = 14.4 \text{ Hz}$ ) allowing its concentration to be monitored *via*  $^1\text{H}$  NMR analysis (Figure S8).

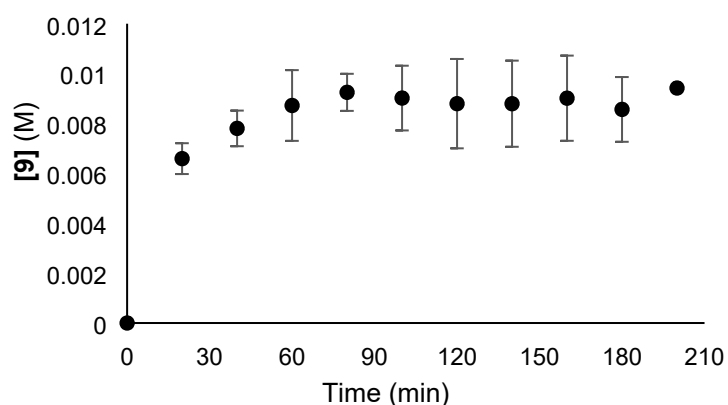

**Figure S8:** Time-course profile of **9** averaged over three independent experiments under standard reaction conditions.

Analysis of **[9]** under various loadings of Pd<sub>2</sub>(dba)<sub>3</sub> and PPh<sub>3</sub> showed faster and greater salt formation with increasing [PPh<sub>3</sub>]. In contrast, elevated [Pd] slowed the formation of salt **9** and lowered the final concentration (Figure S9).

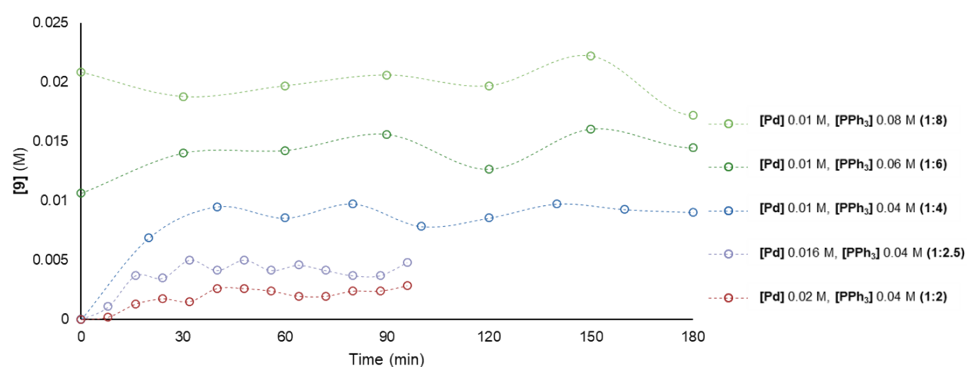

**Figure S9:** Time-course profiles of **9** formation under various Pd<sub>2</sub>(dba)<sub>3</sub> and PPh<sub>3</sub> loadings.

Increasing [PPh<sub>3</sub>] at a fixed [Pd] leads to elongated induction periods and increased **[9]**, however a final maximum **[9]** is achieved rapidly in all cases. This suggests that the origin of the induction period is owed to a different mechanism than **9** formation, as discussed in the main text.

### Same Excess Study - Order in Pd<sub>2</sub>(dba)<sub>3</sub>·CHCl<sub>3</sub>

**Pd:PPh<sub>3</sub> 1:4** When the  $t[\text{cat}]^\alpha$  parameter, developed by Burés,<sup>18</sup> was employed to determine the order in Pd under same excess conditions at different [Pd] overlay was achieved when the exponent was set equal to 1.30 (Figure S10a). An order in catalyst exceeding 1.0 may imply an on-cycle, catalytically active, Pd dimer,<sup>19,20</sup> marking a mechanistically exceptional reaction.

Auxiliary ligands in Pd pre-catalysts can possess kinetic effects which must be disentangled from that of the Pd.<sup>21</sup> Dibenzylideneacetone (dba) is known to both stabilize Pd(0) complexes and possess kinetically-relevant effects at the oxidative addition step.<sup>22-24</sup> Due to the use of Pd<sub>2</sub>(dba)<sub>3</sub>·CHCl<sub>3</sub>, when changing the absolute [Pd] the [dba] also changes. However, dba has no effect on the reaction induction period (Figure S7) and was shown to exhibit zero-order kinetics (Figure S14), allowing us to rule out any involvement.

[Pd] and [PPh<sub>3</sub>] concentrations were altered simultaneously to hold the ratio of the two constant such that the nature of the active catalyst ( $[\text{cat}]_{\text{Active}}$ ) was not disturbed,<sup>25</sup> with overlay now describing an order of 0.30 (Figure S10b). As PPh<sub>3</sub> possesses a negative kinetic effect it is likely that the positive kinetic effect of the palladium was counteracted leading to inconclusive results.

Ignoring the induction period<sup>26</sup> to achieve visual overlay resulted in the similar order of 1.15 (Figure S10c).



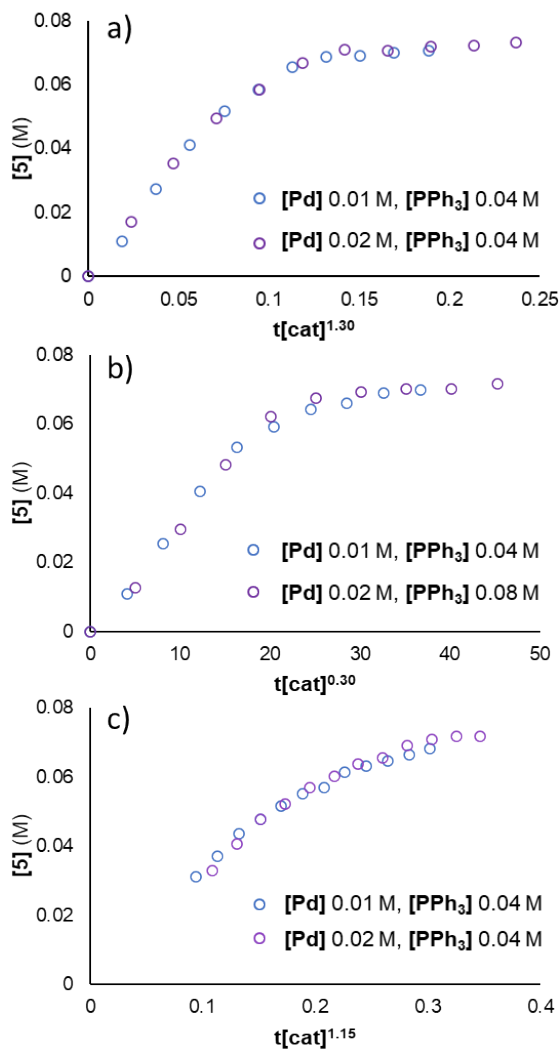

**Figure S10:** Variable timescale normalization analysis of the model reaction under *same excess* conditions at different [Pd] and: a) Normalized timescale analysis of Pd at fixed [PPh<sub>3</sub>], b) Normalized timescale analysis of Pd at [Pd] 0.01 M/0.02 M and [PPh<sub>3</sub>] 0.04 M/0.08 M, respectively, c) Post-induction normalized timescale analysis of Pd at fixed [PPh<sub>3</sub>].

**Influence of PPh<sub>3</sub>** Given that each attempt to elucidate the order in Pd resulted in potentially unrealistic orders, the influence of PPh<sub>3</sub> on the system was probed more deeply. The  $t[\text{cat}]^\alpha$  parameter<sup>18</sup> was employed to compare the overlay between different [PPh<sub>3</sub>] (Figure S11). The kinetic dependency of PPh<sub>3</sub> remains negative under all loadings studied however the exponent varies according to the initial [PPh<sub>3</sub>].

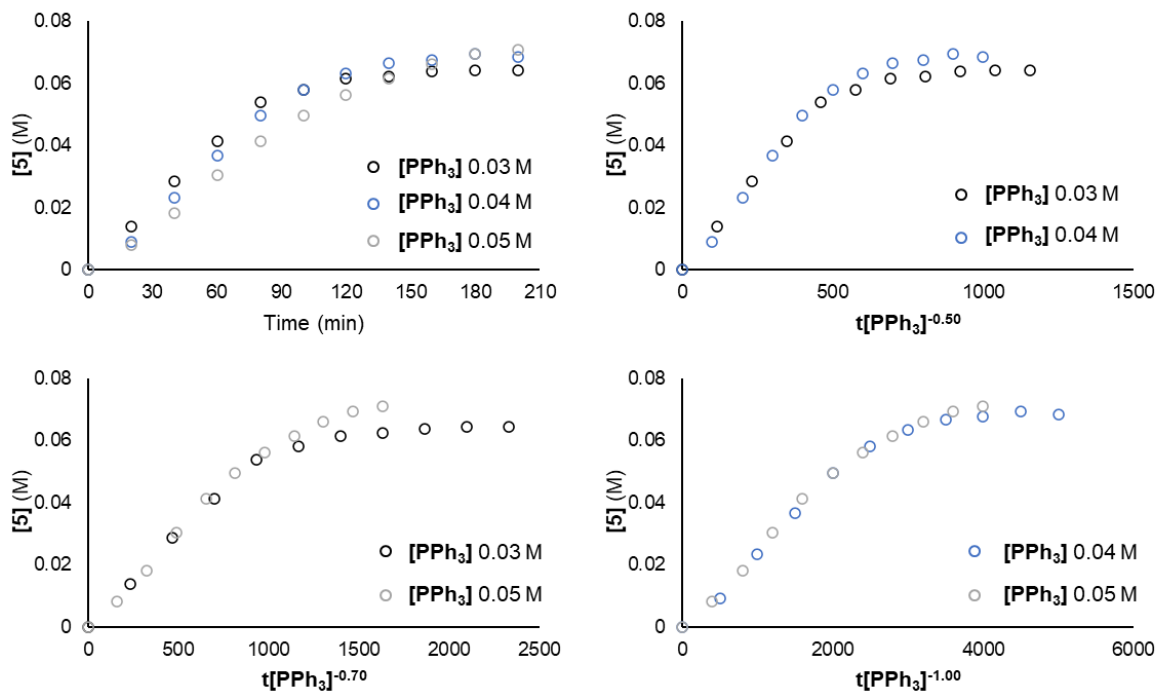

**Figure S11:** Variable timescale normalization analysis of the model reaction under *same excess* conditions with different  $[PPh_3]$  demonstrating the various exponent values leading overlay upon comparison of several  $[PPh_3]$ .

Flooding conditions are a common approach to determining the order in reaction with respect to a given reagent whilst neglecting the kinetic effects of extraneous reagents. Surprisingly, when attempting to determine the kinetic saturation point of  $PPh_3$  it was found that such a phenomenon wasn't observed even under very high loadings of the phosphine (Figure S12). An increased  $[PPh_3]$  at a fixed  $[Pd]$  also resulted in reduced reaction rates and product yields for the model reaction (Table S6).

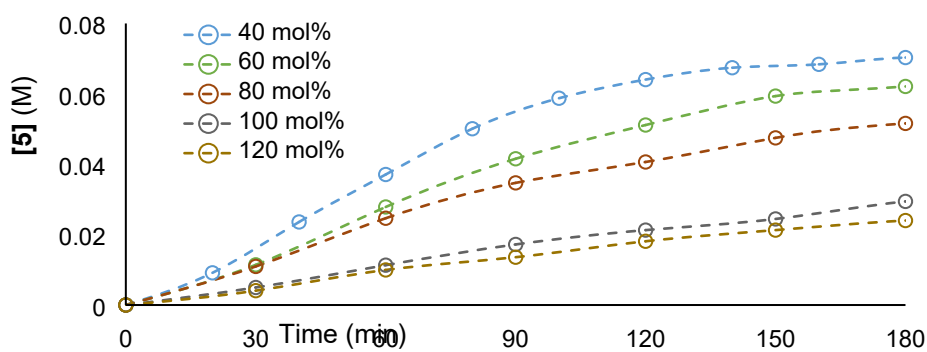

**Figure S12:** Time-course profiles for the model reaction under different  $[PPh_3]$ .

**Table S6:** Yield of **5(E)** under various Pd:PPh<sub>3</sub> ratios.

| Pd:PPh <sub>3</sub> Ratio | <b>5(E)</b> Yield (%) <sup>a</sup> | <b>5(E)</b> Yield (%) <sup>b</sup> |
|---------------------------|------------------------------------|------------------------------------|
| 1:1                       | 18                                 | -                                  |
| 1:2                       | 56                                 | -                                  |
| 1:3                       | 63                                 | -                                  |
| 1:4                       | 68                                 | -                                  |
| 1:5                       | 71                                 | -                                  |
| 1:6                       | 62                                 | 66                                 |
| 1:7                       | 59                                 | 64                                 |
| 1:8                       | 52                                 | 59                                 |
| 1:10                      | 29                                 | 48                                 |
| 1:12                      | 24                                 | 40                                 |

[**2**] 0.1 M, [**1**] 0.3 M, [DIPEA] 0.4 M, [Pd] 0.01 M, Dichloroethane (3 mL), 80 °C. Yields determined by 400 MHz <sup>1</sup>H NMR using 1,3,5-trimethoxybenzene as an internal standard.

<sup>a</sup>Yield after 3 h.

<sup>b</sup>Yield after 24 h.

**Judicious Selection of Pd:PPh<sub>3</sub>** Evidently, determining the order in Pd under saturation of PPh<sub>3</sub> was not experimentally viable. It was found that the induction period could be removed from the reaction under low a Pd:PPh<sub>3</sub> ratio (see main text). To this extent, the Pd:PPh<sub>3</sub> ratio was selected to minimize the phosphine's intrusive kinetic effects between experiments resulting in an order in Pd of 1.0 as judged by the extent of overlay (Figure S13).

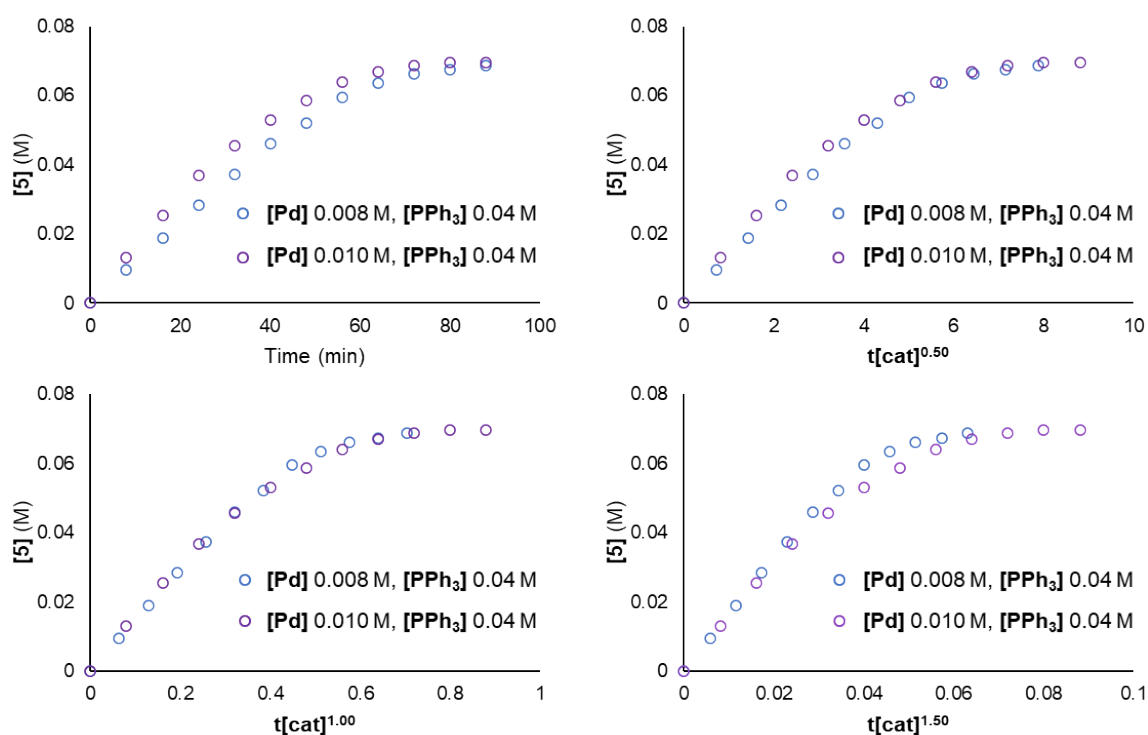**Figure S13:** Variable timescale normalization analysis of the model reaction under *same excess* conditions with varying [Pd] demonstrating the overlay, or lack thereof, at different  $\alpha$  values.

## Different Excess Studies

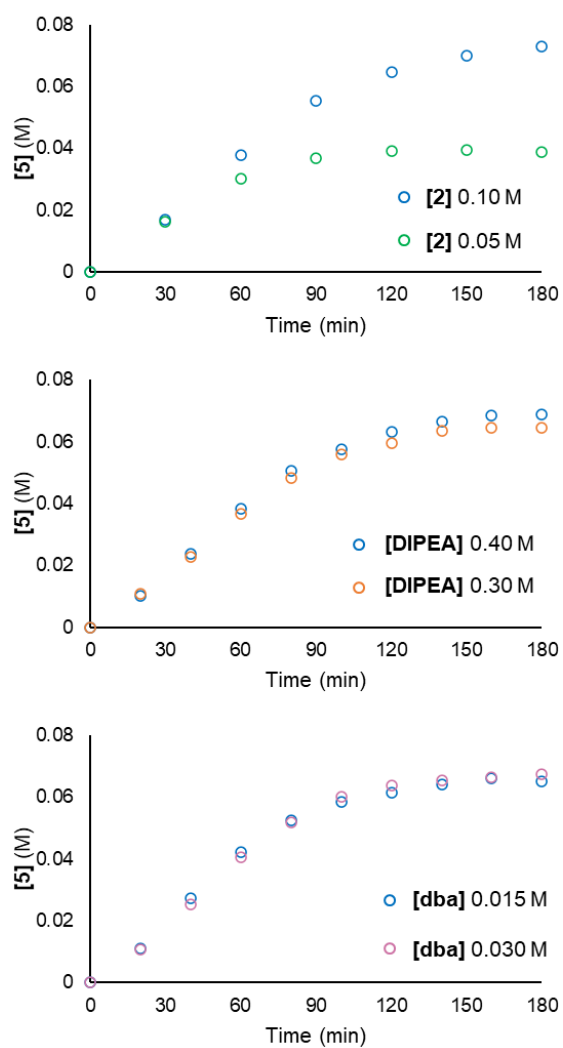

**Figure S14:** Time-course profiles of the model reaction under different excess conditions with respect to benzyl bromide (**2**), *N,N*-diisopropylethylamine (DIPEA), and dibenzylideneacetone (dba) demonstrating zero order kinetic dependence in each.

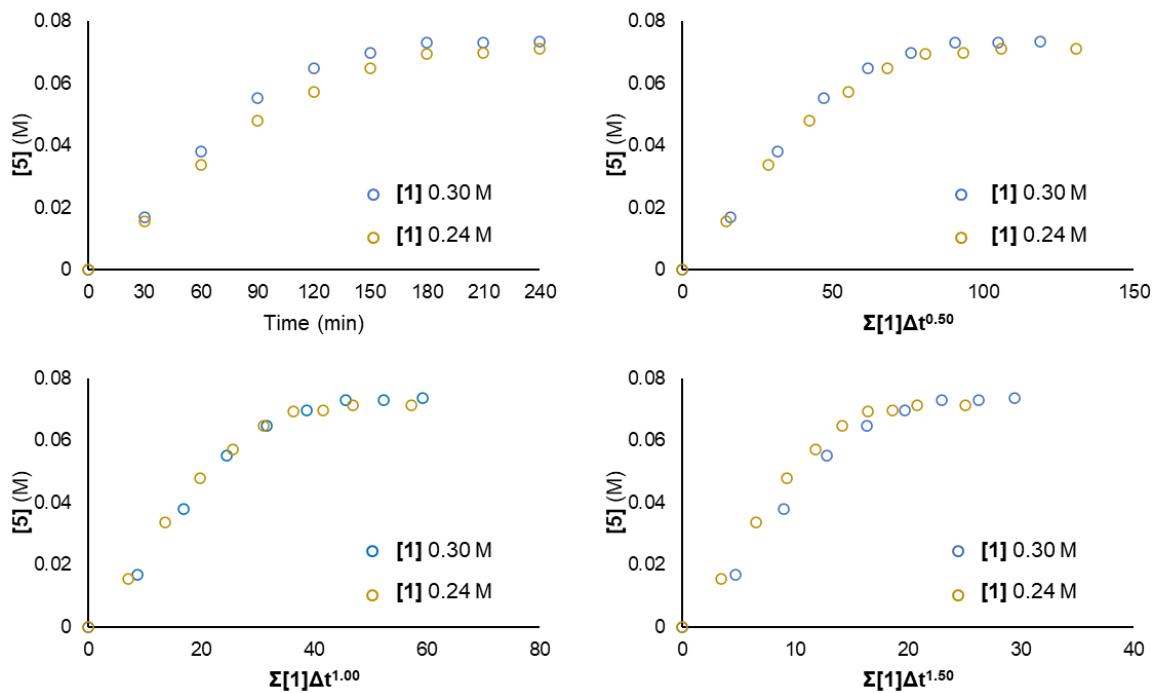

**Figure S15:** Variable timescale normalization analysis of the model reaction under different excess conditions with respect to methyl phenyldiazoacetate (**1**) demonstrating overlay, or lack thereof, at different exponent values.

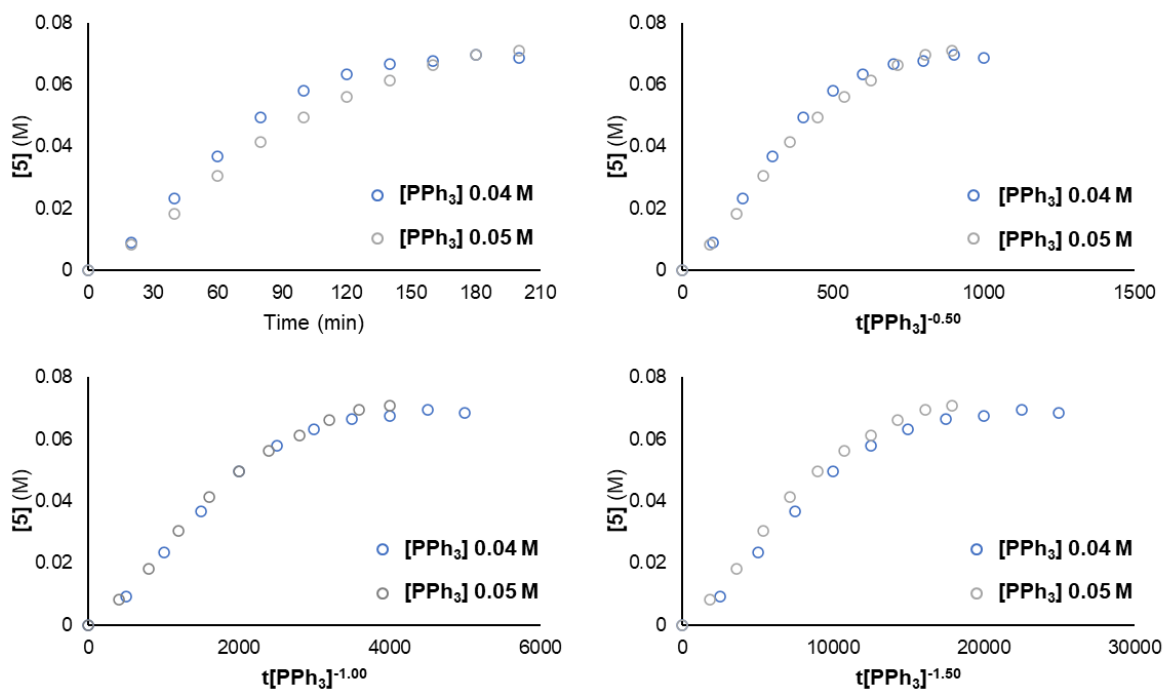

**Figure S16:** Variable timescale normalization analysis of the model reaction under different excess conditions with respect to  $\text{PPh}_3$  demonstrating overlay, or lack thereof, at different exponent values.

## Orders During Induction Period

With knowledge that the induction period depended upon the ratio of Pd:PPh<sub>3</sub>, further experiments were conducted to ascertain any kinetic differences in the catalytic cycle occurring as a result. During the induction period, **2** was found to possess a partial positive order (Figure S17) implying that the electrophile, which shows global zero order kinetics, is kinetically relevant within this timeframe.

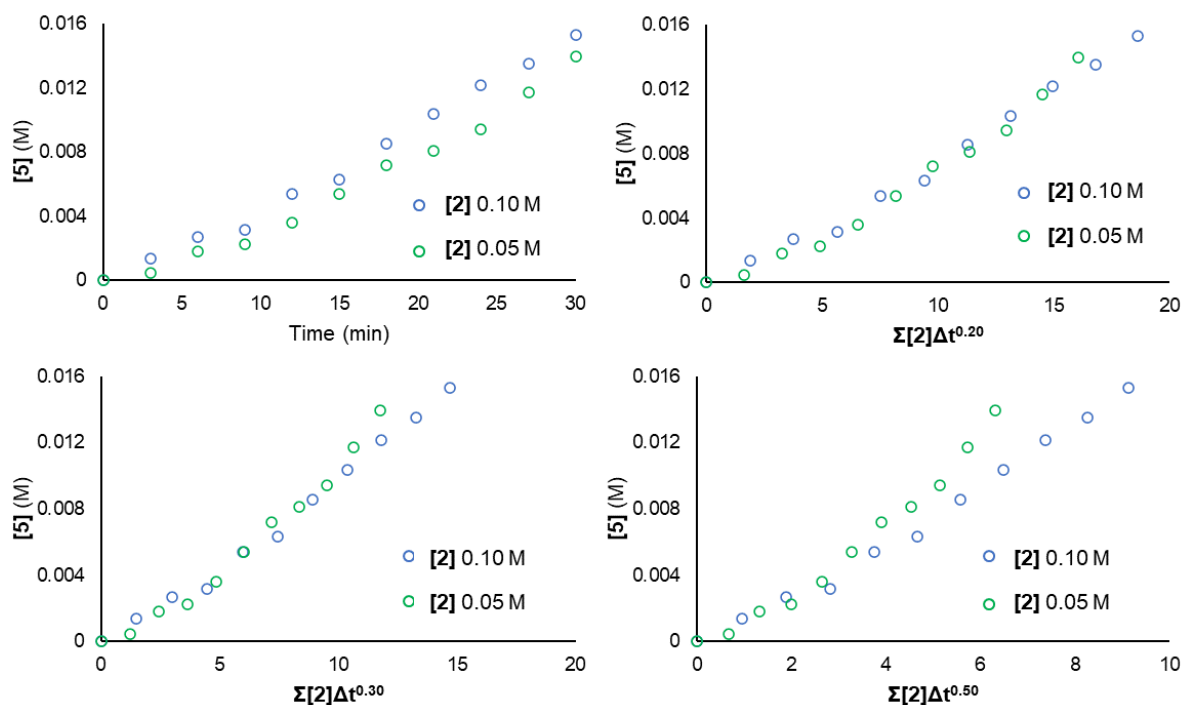

**Figure S17:** Variable timescale normalization analysis of the model reaction during the induction period under different excess conditions with respect to benzyl bromide (**2**) demonstrating overlay, or lack thereof, at different exponent values.

## Different Excess Studies at Lower Pd Loading

A Pd:PPh<sub>3</sub> ratio of 1:8 was adopted, in which the concentration of PPh<sub>3</sub> remained the same but the concentration of Pd was lowered, and further kinetic studies were conducted on this system to understand the irregular nature of the phosphine ligand when attempting to achieve saturation conditions. The catalytic cycle was again shown to be stable under these modified conditions using the same excess protocol (Figure S13a). **2** now demonstrated a half-order dependence whilst **1** maintained global first-order kinetics (Figure S18). This kinetic data is consistent with slower oxidative addition under these conditions.<sup>27</sup>

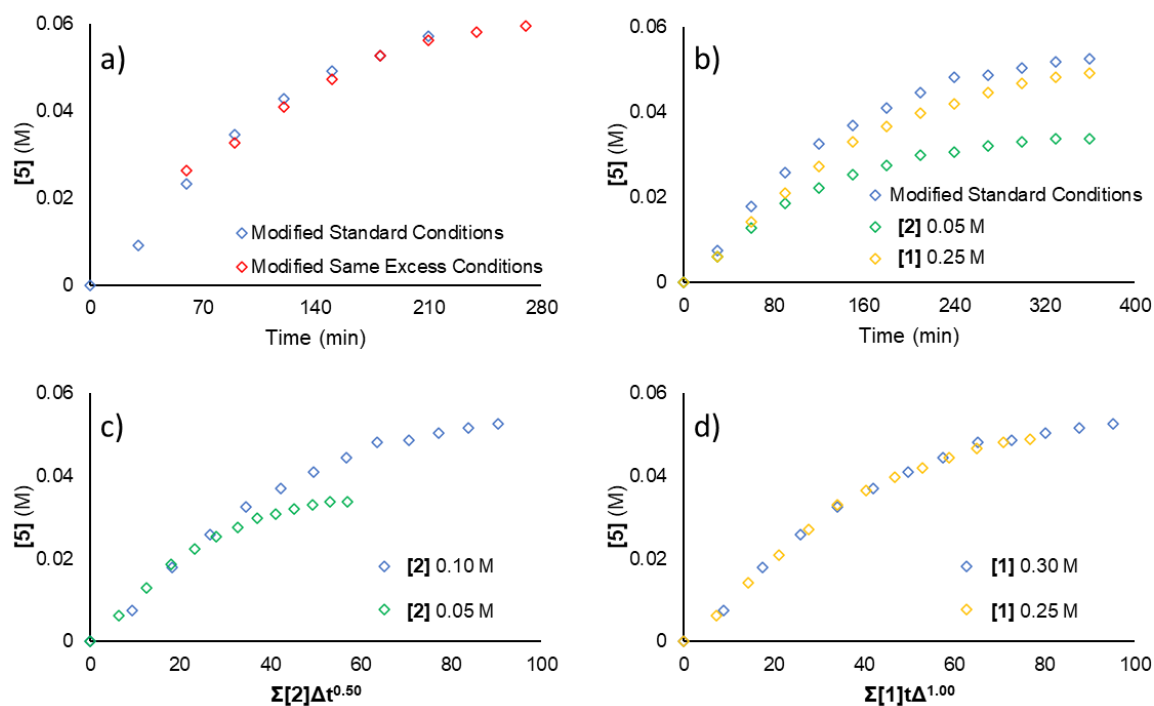

**Figure S18:** Reaction progress kinetic analysis and variable timescale normalization analysis of the model reaction at a Pd:PPh<sub>3</sub> ratio of 1:8: a) adjusted same excess profile, b) time-course profiles under the modified operating conditions and different [2] and [1], c) variable timescale normalization analysis under different excess conditions with respect to 2, d) variable timescale normalization analysis under different excess conditions with respect to 1. Reaction conditions: [2] 0.1 M, [1] 0.3 M, [DIPEA] 0.4 M, [Pd] 0.005 M, [PPh<sub>3</sub>] 0.04 M, Dichloroethane, 80 °C.

## Integral Rate Data

**Table S7:** Reproducibility of the model reaction time-course under standard conditions averaged over three separate experiments (Figure S6).

| Time (min) | [5] (M)     | Standard Deviation |
|------------|-------------|--------------------|
| 0          | 0           | 0                  |
| 20         | 0.010731415 | 0.000381891        |
| 40         | 0.025396873 | 0.001611116        |
| 60         | 0.039901302 | 0.001233207        |
| 80         | 0.051685594 | 0.001502026        |
| 100        | 0.058330856 | 0.000867231        |
| 120        | 0.064075351 | 0.00088758         |
| 140        | 0.066941653 | 0.000943761        |
| 160        | 0.068602969 | 0.000262184        |
| 180        | 0.069360545 | 0.000458561        |
| 200        | 0.069136096 | 0.000964867        |

[2] 0.1 M, [1] 0.3 M, [DIPEA] 0.4 M, [PPh<sub>3</sub>] 0.04 M, [Pd] 0.01 M, 1,2-dichloroethane (3 mL), 80 °C.

**Table S8:** Time-course data of the model reaction employing Pd<sub>2</sub>(dba)<sub>3</sub>/PPh<sub>3</sub> versus Pd(PPh<sub>3</sub>)<sub>4</sub> as the catalyst precursor(s) with emphasis on the induction period (Figure S7).

| A <sup>a</sup> |             | B <sup>b</sup> |             |
|----------------|-------------|----------------|-------------|
| Time (min)     | [5] (M)     | Time (min)     | [5] (M)     |
| 0              | 0           | 0              | 0           |
| 3              | 0.000450383 | 3              | 0.000654022 |
| 6              | 0.001801534 | 6              | 0.000654022 |
| 9              | 0.002251917 | 9              | 0.001962067 |
| 12             | 0.003603068 | 12             | 0.003270111 |
| 15             | 0.005404602 | 15             | 0.004578156 |
| 18             | 0.007206136 | 18             | 0.0058862   |
| 21             | 0.008106903 | 21             | 0.0058862   |
| 24             | 0.009458053 | 24             | 0.007194245 |
| 27             | 0.011709971 | 27             | 0.008502289 |
| 30             | 0.013961888 | 30             | 0.0117724   |
| 40             | 0.025396873 | 50             | 0.024198823 |
| 60             | 0.039901302 | 70             | 0.037279267 |
| 80             | 0.051685594 | 90             | 0.048397646 |
| 100            | 0.058330856 | 110            | 0.058207979 |
| 120            | 0.064075351 | 130            | 0.064748201 |
| 140            | 0.066941653 | 150            | 0.069326357 |
| 160            | 0.068602969 | 170            | 0.071288424 |
| 180            | 0.069360545 | 190            | 0.071288424 |

[2] 0.1 M, [1] 0.3 M, [DIPEA] 0.4 M, 1,2-dichloroethane (3 mL), 80 °C.

<sup>a</sup>[Pd] 0.01 M, [PPh<sub>3</sub>] 0.04 M.

<sup>b</sup>[Pd(PPh<sub>3</sub>)<sub>4</sub>] 0.01 M.



**Table S9:** Time-course data and adjusted time-course data under same excess conditions with respect to **2** and **1** (Figure 1).

| A <sup>a</sup> |             | B <sup>b</sup> |             | Adjusted B                       |                                         |
|----------------|-------------|----------------|-------------|----------------------------------|-----------------------------------------|
| Time (min)     | [5] (M)     | Time (Min)     | [5] (M)     | Adjusted Time (min) <sup>c</sup> | Adjusted Concentration (M) <sup>d</sup> |
| 0              | 0           | 0              | 0           | 40                               | 0.0335558                               |
| 20             | 0.010290445 | 10             | 0.003579285 | 50                               | 0.037135085                             |
| 40             | 0.023712765 | 20             | 0.007158571 | 60                               | 0.040714371                             |
| 60             | 0.038477317 | 30             | 0.011185267 | 70                               | 0.044741067                             |
| 80             | 0.050557405 | 40             | 0.015211963 | 80                               | 0.048767763                             |
| 100            | 0.057715976 | 50             | 0.020580891 | 90                               | 0.054136691                             |
| 120            | 0.063084904 | 60             | 0.025054997 | 100                              | 0.058610797                             |
| 140            | 0.066664189 | 70             | 0.029081693 | 110                              | 0.062637493                             |
| 160            | 0.068453832 | 80             | 0.032660979 | 120                              | 0.066216779                             |
| 180            | 0.068901243 | 90             | 0.034003211 | 130                              | 0.067559011                             |
| 200            | 0.068453832 | 100            | 0.034898032 | 140                              | 0.068453832                             |

[DIPEA] 0.40 M, [PPh<sub>3</sub>] 0.04 M, [Pd] 0.01 M, 1,2- dichloroethane (3 mL), 80 °C. [Excess] = 0.05 M.

<sup>a</sup>[2] 0.10 M, [1] 0.30 M.

<sup>b</sup>[2] 0.05 M, [1] 0.25 M.

<sup>c</sup>Adjustment Constant = 40

<sup>d</sup>Adjustment Constant = 0.033506748

**Table S10:** Different excess study in **2** (Figure S14).

| A <sup>a</sup> |             | B <sup>b</sup> |             |
|----------------|-------------|----------------|-------------|
| Time (min)     | [5] (M)     | Time (Min)     | [5] (M)     |
| 0              | 0           | 0              | 0           |
| 30             | 0.016884179 | 30             | 0.016199685 |
| 60             | 0.03787532  | 60             | 0.030117724 |
| 90             | 0.055215827 | 90             | 0.036962661 |
| 120            | 0.06479874  | 120            | 0.039016142 |
| 150            | 0.06981836  | 150            | 0.039472472 |
| 180            | 0.073012664 | 180            | 0.038787978 |
| 210            | 0.073012664 | 210            | 0.039700636 |
| 240            | 0.073468993 | 240            | 0.039700636 |
| 300            | 0.073012664 | 300            | 0.039244307 |

[1] 0.30 M, [DIPEA] 0.40 M, [PPh<sub>3</sub>] 0.04 M, [Pd] 0.01 M, 1,2- dichloroethane (3 mL), 80 °C. [Excess] = 0.05 M.

<sup>a</sup>[2] 0.10 M.

<sup>b</sup>[2] 0.05 M.

**Table S11:** Different excess study in DIPEA (Figure S14).

| A <sup>a</sup> |             | B <sup>b</sup> |             |
|----------------|-------------|----------------|-------------|
| Time (min)     | [5] (M)     | Time (Min)     | [5] (M)     |
| 0              | 0           | 0              | 0           |
| 20             | 0.010290445 | 20             | 0.010737856 |
| 40             | 0.023712765 | 40             | 0.022817944 |
| 60             | 0.038477317 | 60             | 0.036687675 |
| 80             | 0.050557405 | 80             | 0.048320352 |
| 100            | 0.057715976 | 100            | 0.055926333 |
| 120            | 0.063084904 | 120            | 0.059505619 |
| 140            | 0.066664189 | 140            | 0.063532315 |
| 160            | 0.068453832 | 160            | 0.064427136 |
| 180            | 0.068901243 | 180            | 0.064427136 |
| 200            | 0.068453832 | 200            | 0.065321957 |

[2] 0.10 M, [1] 0.30 M, [PPh<sub>3</sub>] 0.04 M, [Pd] 0.01 M, 1,2- dichloroethane (3 mL), 80 °C. [Excess] = 0.1 M.

<sup>a</sup>[DIPEA] 0.40 M.

<sup>b</sup>[DIPEA] 0.30 M.

**Table S12:** Different excess study in dba (Figure S14).

| A <sup>a</sup> |             | B <sup>b</sup> |             |
|----------------|-------------|----------------|-------------|
| Time (min)     | [5] (M)     | Time (Min)     | [5] (M)     |
| 0              | 0           | 0              | 0           |
| 20             | 0.011148106 | 20             | 0.010702182 |
| 40             | 0.027201379 | 40             | 0.025417682 |
| 60             | 0.042362804 | 60             | 0.040579107 |
| 80             | 0.052619062 | 80             | 0.051727213 |
| 100            | 0.058416077 | 100            | 0.060199774 |
| 120            | 0.061537547 | 120            | 0.063767168 |
| 140            | 0.064213092 | 140            | 0.065550865 |
| 160            | 0.065996789 | 160            | 0.066442714 |
| 180            | 0.065104941 | 180            | 0.067334562 |
| 200            | 0.065996789 | 200            | 0.069118259 |

[2] 0.10 M, [1] 0.30 M, [DIPEA] 0.4 M, [PPh<sub>3</sub>] 0.04 M, [Pd] 0.01 M, 1,2- dichloroethane (3 mL), 80 °C. [Excess] = 0.015 M.

<sup>a</sup>[dba] 0.015 M.

<sup>b</sup>[dba] 0.030 M.

**Table S13:** Different excess study in **1** (Figure S15).

| A <sup>a</sup> |             | B <sup>b</sup> |             |
|----------------|-------------|----------------|-------------|
| Time (min)     | [5] (M)     | Time (Min)     | [5] (M)     |
| 0              | 0           | 0              | 0           |
| 30             | 0.016884179 | 30             | 0.015515191 |
| 60             | 0.03787532  | 60             | 0.033768357 |
| 90             | 0.055215827 | 90             | 0.047914561 |
| 120            | 0.06479874  | 120            | 0.057041144 |
| 150            | 0.06981836  | 150            | 0.06479874  |
| 180            | 0.073012664 | 180            | 0.069362031 |
| 210            | 0.073012664 | 210            | 0.06981836  |
| 240            | 0.073468993 | 240            | 0.071187348 |
| 300            | 0.073012664 | 300            | 0.071187348 |

[2] 0.10 M, [DIPEA] 0.40 M, [PPh<sub>3</sub>] 0.04 M, [Pd] 0.01 M, 1,2- dichloroethane (3 mL), 80 °C. [Excess] = 0.06 M.

<sup>a</sup>[1] 0.30 M.

<sup>b</sup>[1] 0.24 M.

**Table S14:** Different excess study in PPh<sub>3</sub> (Figure S11 and S16).

| Time (min) | A <sup>a</sup> | B <sup>b</sup> | C <sup>c</sup> |
|------------|----------------|----------------|----------------|
|            | [5] (M)        | [5] (M)        | [5] (M)        |
| 0          | 0              | 0              | 0              |
| 20         | 0.013793924    | 0.009037398    | 0.008086093    |
| 40         | 0.028539152    | 0.023306974    | 0.018074796    |
| 60         | 0.041381771    | 0.036625245    | 0.030441762    |
| 80         | 0.053748737    | 0.049467864    | 0.041381771    |
| 100        | 0.058029609    | 0.058029609    | 0.049467864    |
| 120        | 0.061359177    | 0.063261787    | 0.056126999    |
| 140        | 0.062310482    | 0.066591355    | 0.061359177    |
| 160        | 0.06373744     | 0.06754266     | 0.066115702    |
| 180        | 0.064213092    | 0.06944527     | 0.06944527     |
| 200        | 0.064213092    | 0.068493965    | 0.070872228    |

[2] 0.10 M, [1] 0.30 M, [DIPEA] 0.40 M, [Pd] 0.01 M, 1,2-dichloroethane (3 mL), 80 °C. [Excess] = 0.01 M/0.02 M.

<sup>a</sup>[PPh<sub>3</sub>] 0.03 M.

<sup>b</sup>[PPh<sub>3</sub>] 0.04 M.

<sup>c</sup>[PPh<sub>3</sub>] 0.05 M.

**Table S15:** Time-course data for the formation of **9** under standard reaction conditions averaged over three independent experiments (Figure S8).

| Time (min) | [9] (M)     | Standard Deviation (M) |
|------------|-------------|------------------------|
| 0          | 0           | 0                      |
| 20         | 0.00659076  | 0.000618154            |
| 40         | 0.007802436 | 0.000714354            |
| 60         | 0.00872104  | 0.001418042            |
| 80         | 0.009248221 | 0.000743472            |
| 100        | 0.00901857  | 0.001297626            |
| 120        | 0.008794865 | 0.001791413            |
| 140        | 0.008792635 | 0.001727045            |
| 160        | 0.009013368 | 0.001708124            |
| 180        | 0.008563728 | 0.001298182            |
| 200        | 0.009420893 | 0.0000357358           |

[2] 0.10 M, [1] 0.30 M, [DIPEA] 0.40 M, [PPh<sub>3</sub>] 0.04 M, [Pd] 0.01 M, 1,2- dichloroethane (3 mL), 80 °C.

**Table S16:** Formation of **9** under various Pd and PPh<sub>3</sub> loadings (Figure S9).

| A <sup>a</sup> |             | B <sup>b</sup> |             | C <sup>c</sup> |             |
|----------------|-------------|----------------|-------------|----------------|-------------|
| Time (min)     | [9] (M)     | Time (min)     | [9] (M)     | Time (min)     | [9] (M)     |
| 0              | 0           | 0              | 0           | 0              | 0           |
| 8              | 0.001094992 | 8              | 0.000218998 | 20             | 0.008213925 |
| 16             | 0.003722972 | 16             | 0.00131399  | 40             | 0.009582912 |
| 24             | 0.003503974 | 24             | 0.001751987 | 60             | 0.011180064 |
| 32             | 0.005036962 | 32             | 0.001532988 | 80             | 0.011180064 |
| 40             | 0.004160969 | 40             | 0.00262798  | 100            | 0.009354748 |
| 48             | 0.005036962 | 48             | 0.00262798  | 120            | 0.009354748 |
| 56             | 0.004160969 | 56             | 0.002408982 | 140            | 0.010723735 |
| 64             | 0.004598965 | 64             | 0.001970985 | 160            | 0.010039241 |
| 72             | 0.004160969 | 72             | 0.001970985 | 180            | 0.009354748 |
| 80             | 0.003722972 | 80             | 0.002408982 | -              | -           |
| 88             | 0.003722972 | 88             | 0.002408982 | -              | -           |

[2] 0.10 M, [1] 0.30 M, [DIPEA] 0.40 M, 1,2- dichloroethane (3 mL), 80 °C.

<sup>a</sup>[Pd] 0.016 M, [PPh<sub>3</sub>] 0.04 M.

<sup>b</sup>[Pd] 0.02 M, [PPh<sub>3</sub>] 0.04 M.

<sup>c</sup>[Pd] 0.02 M, [PPh<sub>3</sub>] 0.08 M.

**Table S17:** Formation of **9** under various loadings of PPh<sub>3</sub> at a fixed loading of Pd (Figure S9).

| A <sup>a</sup> |             | B <sup>b</sup> |             | C <sup>c</sup> |             |
|----------------|-------------|----------------|-------------|----------------|-------------|
| Time(min)      | [9] (M)     | Time (min)     | [9] (M)     | Time (min)     | [9] (M)     |
| 0              | 0           | 0              | 0           | 0              | 0           |
| 20             | 0.002779595 | 20             | 0.006896962 | 20             | 0.012842618 |
| 40             | 0.003284975 | 40             | 0.009513051 | 40             | 0.013080445 |
| 60             | 0.004295737 | 60             | 0.008561746 | 60             | 0.012604792 |
| 80             | 0.002526904 | 80             | 0.009750877 | 80             | 0.016172186 |
| 100            | 0.004295737 | 100            | 0.007848267 | 100            | 0.016172186 |
| 120            | 0.005053808 | 120            | 0.008561746 | 120            | 0.015696534 |
| 140            | 0.00631726  | 140            | 0.009750877 | 140            | 0.014983055 |
| 160            | 0.00606457  | 160            | 0.009275224 | 160            | 0.014269576 |
| 180            | 0.005559189 | 180            | 0.009037398 | 180            | 0.01593436  |
| 200            | 0.005306499 | 200            | 0.008799572 | 200            | 0.016647839 |

[2] 0.10 M, [1] 0.30 M, [DIPEA] 0.40 M, [Pd] 0.01 M, 1,2- dichloroethane (3 mL), 80 °C.

<sup>a</sup>[PPh<sub>3</sub>] 0.03 M.

<sup>b</sup>[PPh<sub>3</sub>] 0.04 M.

<sup>c</sup>[PPh<sub>3</sub>] 0.05 M.

**Table S18:** Same excess study under different loadings of Pd (Figure S10).

| A <sup>a</sup> |             | B <sup>b</sup> |             |
|----------------|-------------|----------------|-------------|
| Time (min)     | [5] (M)     | Time (Min)     | [5] (M)     |
| 0              | 0           | 0              | 0           |
| 20             | 0.011058921 | 10             | 0.017049171 |
| 40             | 0.027186515 | 20             | 0.035480706 |
| 60             | 0.041010167 | 30             | 0.049304358 |
| 80             | 0.0516083   | 40             | 0.058520126 |
| 100            | 0.058520126 | 50             | 0.066814317 |
| 120            | 0.065431952 | 60             | 0.070961413 |
| 140            | 0.068657471 | 70             | 0.070500624 |
| 160            | 0.069118259 | 80             | 0.071882989 |
| 180            | 0.070039836 | 90             | 0.072343778 |
| 200            | 0.070500624 | 100            | 0.073265355 |

[2] 0.10 M, [1] 0.30 M, [DIPEA] 0.40 M, [PPh<sub>3</sub>] 0.04 M, 1,2- dichloroethane (3 mL), 80 °C.

<sup>a</sup>[Pd] 0.01 M.

<sup>b</sup>[Pd] 0.02 M.

**Table S19:** Same excess study under different [Pd] and [PPh<sub>3</sub>] where Pd:PPh<sub>3</sub> = 1:4 (Figure S10).

| A <sup>a</sup> |             | B <sup>b</sup> |             |
|----------------|-------------|----------------|-------------|
| Time (min)     | [5] (M)     | Time (Min)     | [5] (M)     |
| 0              | 0           | 0              | 0           |
| 20             | 0.0109519   | 20             | 0.012777216 |
| 40             | 0.025554432 | 40             | 0.029661395 |
| 60             | 0.040613294 | 60             | 0.04837089  |
| 80             | 0.053390511 | 80             | 0.062060765 |
| 100            | 0.05932279  | 100            | 0.067536714 |
| 120            | 0.06434241  | 120            | 0.069362031 |
| 140            | 0.066167727 | 140            | 0.070274689 |
| 160            | 0.068905702 | 160            | 0.070274689 |
| 180            | 0.06981836  | 180            | 0.071643677 |

[2] 0.10 M, [1] 0.30 M, [DIPEA] 0.40 M, 1,2- dichloroethane (3 mL), 80 °C.

<sup>a</sup>[Pd] 0.01 M, [PPh<sub>3</sub>] 0.04 M.

<sup>b</sup>[Pd] 0.02 M, [PPh<sub>3</sub>] 0.08 M.

**Table S20:** Attempted determination of saturation conditions with respect to PPh<sub>3</sub> (Figure S12).

| Time (min) | [5] (M) <sup>a</sup> | [5] (M) <sup>b</sup> | [5] (M) <sup>c</sup> | [5] (M) <sup>d</sup> | [5] (M) <sup>e</sup> | [5] (M) <sup>f</sup> |
|------------|----------------------|----------------------|----------------------|----------------------|----------------------|----------------------|
| 0          | 0                    | 0                    | 0                    | 0                    | 0                    | 0                    |
| 13         | 0.018241275          | -                    | -                    | -                    | -                    | -                    |
| 20         | -                    | 0.009150366          | -                    | -                    | -                    | -                    |
| 28         | 0.032974612          | -                    | -                    | -                    | -                    | -                    |
| 30         | -                    | -                    | 0.011415661          | 0.010959034          | 0.004981469          | 0.004075748          |
| 40         | -                    | 0.023598311          | -                    | -                    | -                    | -                    |
| 42         | 0.044200012          | -                    | -                    | -                    | -                    | -                    |
| 56         | 0.052619062          | -                    | -                    | -                    | -                    | -                    |
| 60         | -                    | -                    | 0.027854212          | 0.024657827          | 0.011321521          | 0.009962939          |
| 70         | 0.054022237          | -                    | -                    | -                    | -                    | -                    |
| 60         | -                    | 0.037083061          | -                    | -                    | -                    | -                    |
| 80         | -                    | 0.050086212          | -                    | -                    | -                    | -                    |
| 84         | 0.055425412          | -                    | -                    | -                    | -                    | -                    |
| 90         | -                    | -                    | 0.041553006          | 0.034703609          | 0.017208712          | 0.013585826          |
| 98         | 0.056126999          | -                    | -                    | -                    | -                    | -                    |
| 100        | -                    | 0.058754979          | -                    | -                    | -                    | -                    |
| 112        | 0.056126999          | -                    | -                    | -                    | -                    | -                    |
| 120        | -                    | 0.06405256           | 0.051142161          | 0.040639753          | 0.02128446           | 0.018114434          |
| 126        | 0.056828587          | -                    | -                    | -                    | -                    | -                    |
| 140        | 0.056126999          | 0.067423747          | -                    | -                    | -                    | -                    |
| 150        | -                    | -                    | 0.059361436          | 0.047489149          | 0.024454486          | 0.02128446           |
| 154        | 0.055425412          | -                    | -                    | -                    | -                    | -                    |
| 160        | -                    | 0.068386943          | -                    | -                    | -                    | -                    |
| 168        | 0.056126999          | -                    | -                    | -                    | -                    | -                    |
| 180        | -                    | 0.070313336          | 0.062101195          | 0.051598787          | 0.029435955          | 0.024001625          |
| 200        | -                    | 0.06935014           | -                    | -                    | -                    | -                    |
| 210        | -                    | -                    | -                    | -                    | 0.03170026           | 0.025360208          |
| 240        | -                    | -                    | 0.068037339          | 0.056165051          | 0.033511703          | 0.027624512          |

[2] 0.10 M, [1] 0.30 M, [DIPEA] 0.40 M, [Pd] 0.01 M, 1,2- dichloroethane (3 mL), 80 °C.

<sup>a</sup>[PPh<sub>3</sub>] 0.02 M. <sup>b</sup>[PPh<sub>3</sub>] 0.04 M. <sup>c</sup>[PPh<sub>3</sub>] 0.06 M. <sup>d</sup>[PPh<sub>3</sub>] 0.08 M. <sup>e</sup>[PPh<sub>3</sub>] 0.10 M. <sup>f</sup>[PPh<sub>3</sub>] 0.12 M.

**Table S21:** Time-course data and adjusted time-course data under same excess conditions with respect to **2** and **1** at a Pd:PPh<sub>3</sub> = 1:8 (Figure S18).

| A <sup>a</sup> |             | B <sup>b</sup> |             | Adjusted B                       |                                         |
|----------------|-------------|----------------|-------------|----------------------------------|-----------------------------------------|
| Time (min)     | [5] (M)     | Time (Min)     | [5] (M)     | Adjusted Time (min) <sup>c</sup> | Adjusted Concentration (M) <sup>d</sup> |
| 0              | 0           | 0              | 0           | 60                               | 0.026380879                             |
| 30             | 0.009096855 | 30             | 0.006367798 | 90                               | 0.032748677                             |
| 60             | 0.02319698  | 60             | 0.014554968 | 120                              | 0.040935846                             |
| 90             | 0.034568048 | 90             | 0.020922766 | 150                              | 0.047303645                             |
| 120            | 0.042755217 | 120            | 0.026380879 | 180                              | 0.052761758                             |
| 150            | 0.049123016 | 150            | 0.030019621 | 210                              | 0.056400499                             |
| 180            | 0.052761758 | 180            | 0.031838992 | 240                              | 0.05821987                              |
| 210            | 0.057310185 | 210            | 0.03320352  | 270                              | 0.059584399                             |
| 240            | 0.060039241 | 240            | 0.033658363 | 300                              | 0.060039241                             |

[DIPEA] 0.40 M, [PPh<sub>3</sub>] 0.04 M, [Pd] 0.005 M, 1,2- dichloroethane (4 mL), 80 °C. [Excess] = 0.05 M.

<sup>a</sup>[2] 0.10 M, [1] 0.30 M.

<sup>b</sup>[2] 0.05 M, [1] 0.25 M.

<sup>c</sup>Adjustment Constant = 60

<sup>d</sup>Adjustment Constant = 0.026380879

**Table S22:** Different excess study in **2** at Pd:PPh<sub>3</sub> = 1:8 (Figure S18).

| A <sup>a</sup> |             | B <sup>b</sup> |             |
|----------------|-------------|----------------|-------------|
| Time (min)     | [5] (M)     | Time (Min)     | [5] (M)     |
| 0              | 0           | 0              | 0           |
| 30             | 0.007605981 | 30             | 0.006263749 |
| 60             | 0.017896427 | 60             | 0.012974909 |
| 90             | 0.025949819 | 90             | 0.018791248 |
| 120            | 0.032660979 | 120            | 0.022370533 |
| 150            | 0.037135085 | 150            | 0.025502408 |
| 180            | 0.041161781 | 180            | 0.027739461 |
| 210            | 0.044741067 | 210            | 0.029976515 |
| 240            | 0.048320352 | 240            | 0.030871336 |
| 270            | 0.048767763 | 270            | 0.032213568 |
| 300            | 0.050557405 | 300            | 0.033108389 |
| 330            | 0.051899637 | 330            | 0.034003211 |
| 360            | 0.052794459 | 360            | 0.034003211 |

[1] 0.30 M, [DIPEA] 0.40 M, [PPh<sub>3</sub>] 0.04 M, [Pd] 0.005 M, 1,2-dichloroethane (3 mL), 80 °C. [Excess] = 0.05 M. Experimental outcome confirmed over three independent experiments.

<sup>a</sup>[2] 0.10 M.

<sup>b</sup>[2] 0.05 M.

**Table S23:** Different excess study in **1** at Pd:PPh<sub>3</sub> = 1:8 (Figure S18).

| A <sup>a</sup> |             | B <sup>b</sup> |             |
|----------------|-------------|----------------|-------------|
| Time (min)     | [5] (M)     | Time (Min)     | [5] (M)     |
| 0              | 0           | 0              | 0           |
| 30             | 0.007605981 | 30             | 0.006263749 |
| 60             | 0.017896427 | 60             | 0.014317141 |
| 90             | 0.025949819 | 90             | 0.021028301 |
| 120            | 0.032660979 | 120            | 0.027292051 |
| 150            | 0.037135085 | 150            | 0.033108389 |
| 180            | 0.041161781 | 180            | 0.036687675 |
| 210            | 0.044741067 | 210            | 0.039819549 |
| 240            | 0.048320352 | 240            | 0.042056603 |
| 270            | 0.048767763 | 270            | 0.044741067 |
| 300            | 0.050557405 | 300            | 0.04697812  |
| 330            | 0.051899637 | 330            | 0.048320352 |
| 360            | 0.052794459 | 360            | 0.049215173 |

[2] 0.10 M, [DIPEA] 0.40 M, [PPh<sub>3</sub>] 0.04 M, [Pd] 0.005 M, 1,2-dichloroethane (3 mL), 80 °C. [Excess] = 0.05 M. Experimental outcome confirmed over three independent experiments.

<sup>a</sup>[1] 0.30 M.

<sup>b</sup>[1] 0.25 M.

**Table S24:** Same excess study under different loadings of Pd in the presence of extraneous **9**.

| A <sup>a</sup> |             | B <sup>b</sup> |             |
|----------------|-------------|----------------|-------------|
| Time (min)     | [5] (M)     | Time (Min)     | [5] (M)     |
| 0              | 0           | 0              | 0           |
| 20             | 0.011787264 | 10             | 0.015867471 |
| 40             | 0.02584131  | 20             | 0.033095012 |
| 60             | 0.038081931 | 30             | 0.044882276 |
| 80             | 0.049869196 | 40             | 0.053949402 |
| 100            | 0.057122897 | 50             | 0.062563173 |
| 120            | 0.062563173 | 60             | 0.067550092 |
| 140            | 0.06664338  | 70             | 0.069363517 |
| 160            | 0.069816874 | 80             | 0.071176943 |
| 180            | 0.071630299 | 90             | 0.072990368 |
| 200            | 0.072990368 | 100            | 0.073443724 |

[2] 0.10 M, [1] 0.30 M, [DIPEA] 0.40 M, [PPh<sub>3</sub>] 0.04 M, [9] 0.01 M, 1,2-dichloroethane (3 mL), 80 °C.

<sup>a</sup>[Pd] 0.01 M.

<sup>b</sup>[Pd] 0.02 M.

**Table S25:** Post-induction kinetic analysis under different loadings of Pd.

| A <sup>a</sup> |             | B <sup>b</sup> |             |
|----------------|-------------|----------------|-------------|
| Time (min)     | [5] (M)     | Time (Min)     | [5] (M)     |
| 0              | 0           | 0              | 0           |
| 40             | 0.022742137 | 20             | 0.027647304 |
| 50             | 0.031214698 | 25             | 0.032998395 |
| 60             | 0.037011713 | 30             | 0.040579107 |
| 70             | 0.043700577 | 35             | 0.047713895 |
| 80             | 0.047713895 | 40             | 0.052173138 |
| 90             | 0.051727213 | 45             | 0.057078304 |
| 100            | 0.055294607 | 50             | 0.060199774 |
| 110            | 0.057078304 | 55             | 0.063767168 |
| 120            | 0.061537547 | 60             | 0.065550865 |
| 130            | 0.063321244 | 65             | 0.069118259 |
| 140            | 0.064659017 | 70             | 0.070901956 |
| 150            | 0.066442714 | 75             | 0.071793805 |
| 160            | 0.068226411 | 80             | 0.071793805 |

[2] 0.10 M, [1] 0.30 M, [DIPEA] 0.40 M, [PPh<sub>3</sub>] 0.04 M, 1,2- dichloroethane (4 mL), 80 °C.

<sup>a</sup>[Pd] 0.01 M.

<sup>b</sup>[Pd] 0.02 M.

**Table S26:** Same excess study under judicious loadings of Pd (Figure 3).

| A <sup>a</sup> |             | B <sup>b</sup> |             |
|----------------|-------------|----------------|-------------|
| Time (min)     | [5] (M)     | Time (Min)     | [5] (M)     |
| 0              | 0           | 0              | 0           |
| 8              | 0.009635928 | 8              | 0.013139901 |
| 16             | 0.018833859 | 16             | 0.025403809 |
| 24             | 0.028469786 | 24             | 0.036791724 |
| 32             | 0.03722972  | 32             | 0.045551658 |
| 40             | 0.045989655 | 40             | 0.052997602 |
| 48             | 0.052121608 | 48             | 0.058691559 |
| 56             | 0.059567553 | 56             | 0.06394752  |
| 64             | 0.063509523 | 64             | 0.067013497 |
| 72             | 0.066137503 | 72             | 0.068765483 |
| 80             | 0.067451493 | 80             | 0.069641477 |
| 88             | 0.068765483 | 88             | 0.069641477 |

[2] 0.10 M, [1] 0.30 M, [DIPEA] 0.40 M, [PPh<sub>3</sub>] 0.04 M, 1,2- dichloroethane (4 mL), 80 °C.

<sup>a</sup>[Pd] 0.016 M.

<sup>b</sup>[Pd] 0.020 M.

## Spectroscopic Analysis

### General Experimental Procedure for NMR Experiments

To an oven-dried, medium-pressure rated, J-Young NMR tube,  $\text{Pd}_2(\text{dba})_3 \cdot \text{CHCl}_3$  (0.003 mmol),  $\text{PPh}_3$  (0.024 mmol), 1,3,5-trimethoxybenzene (0.06 mmol) and/or a sealed capillary containing tributylphosphine oxide (0.049 M in  $d_8$ -toluene) were added. The vessel was inserted into a sealed Schenk-to-NMR tube adapter then evacuated and flushed with  $\text{N}_2$  gas in triplicate.  $d_8$ -Toluene (0.6 mL) and DIPEA (0.24 mmol) were added and the solution was gently heated until a homogeneous, gold solution was achieved. The mixture was allowed to cool to room temperature before the benzyl bromide (0.06 mmol) and diazo compound (0.18 mmol) derivatives were added. Under a positive pressure of  $\text{N}_2$  gas, the reaction vessel was removed from the Schlenk-to-NMR tube adapter and sealed to maintain an inert reaction atmosphere.

The reaction was then immediately loaded onto a Bruker Avance Series 600 MHz NMR spectrometer with the sample probe pre-heated at 80 °C wherein spectroscopic analysis was conducted at the same temperature.

### Example Online NMR Analysis

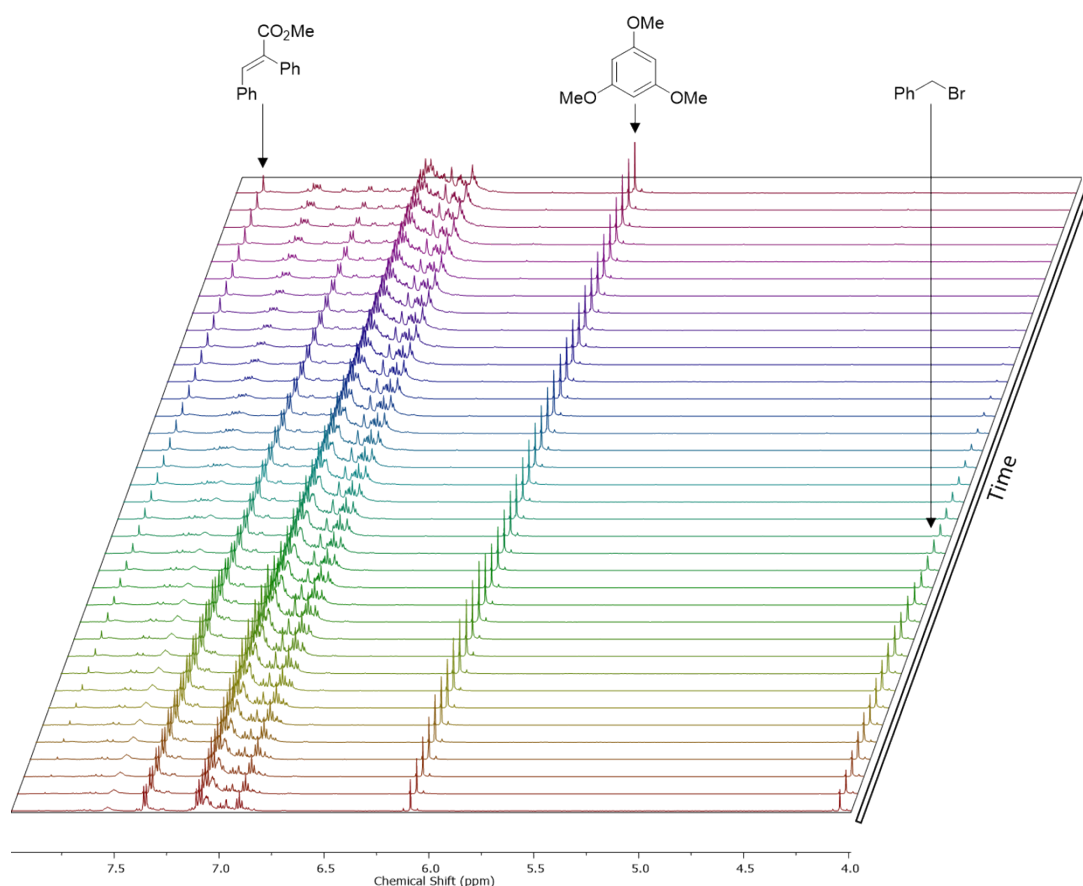

**Figure S19:** Stacked  $^1\text{H}$  NMR spectra of the model reaction over the intended reaction time under standard online NMR reaction conditions in  $d_8$ -toluene.



**Figure S20:** Time-course profile of the model reaction in d8-toluene monitored *via* online NMR spectroscopy.

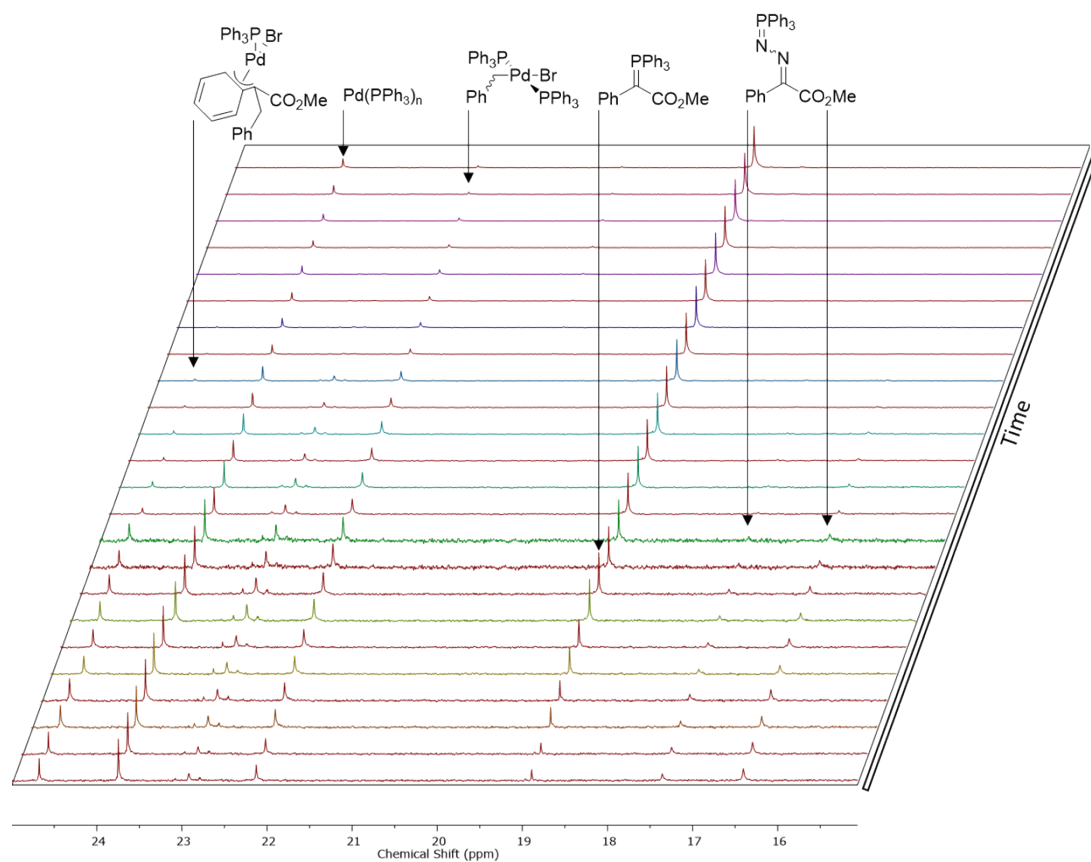

**Figure S21:** Stacked  $^{31}\text{P}\{^1\text{H}\}$  NMR spectra of the model reaction over the intended reaction time under standard online NMR reaction conditions in toluene-d8.

All phosphorous-containing species are observed to decrease over time by  $^{31}\text{P}\{^1\text{H}\}$  NMR with the exception of phosphorane **8** due to its formation being irreversible. No free  $\text{PPh}_3$  is observed throughout the reaction time-course.

## Additional Spectra of the Model Reaction

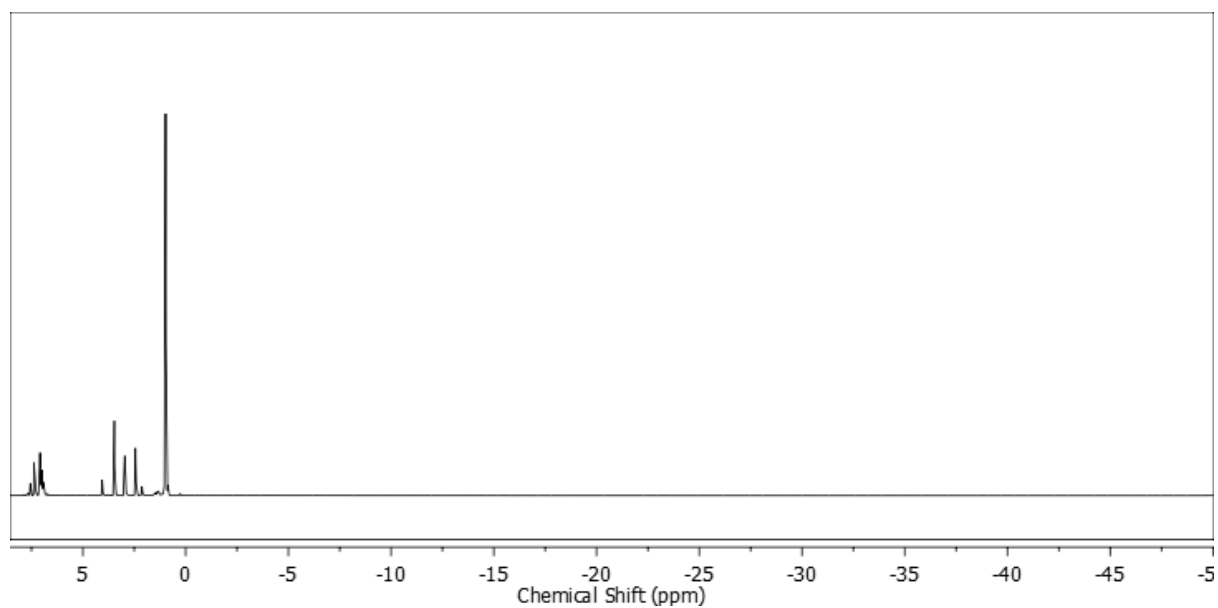

**Figure S22:** Extended upfield  $^1\text{H}$  NMR spectrum of the model reaction with the  $\delta 8.00$  to  $-50.00$  ppm region enhanced to demonstrate the lack of a palladium-hydride signal under standard online NMR reaction conditions.

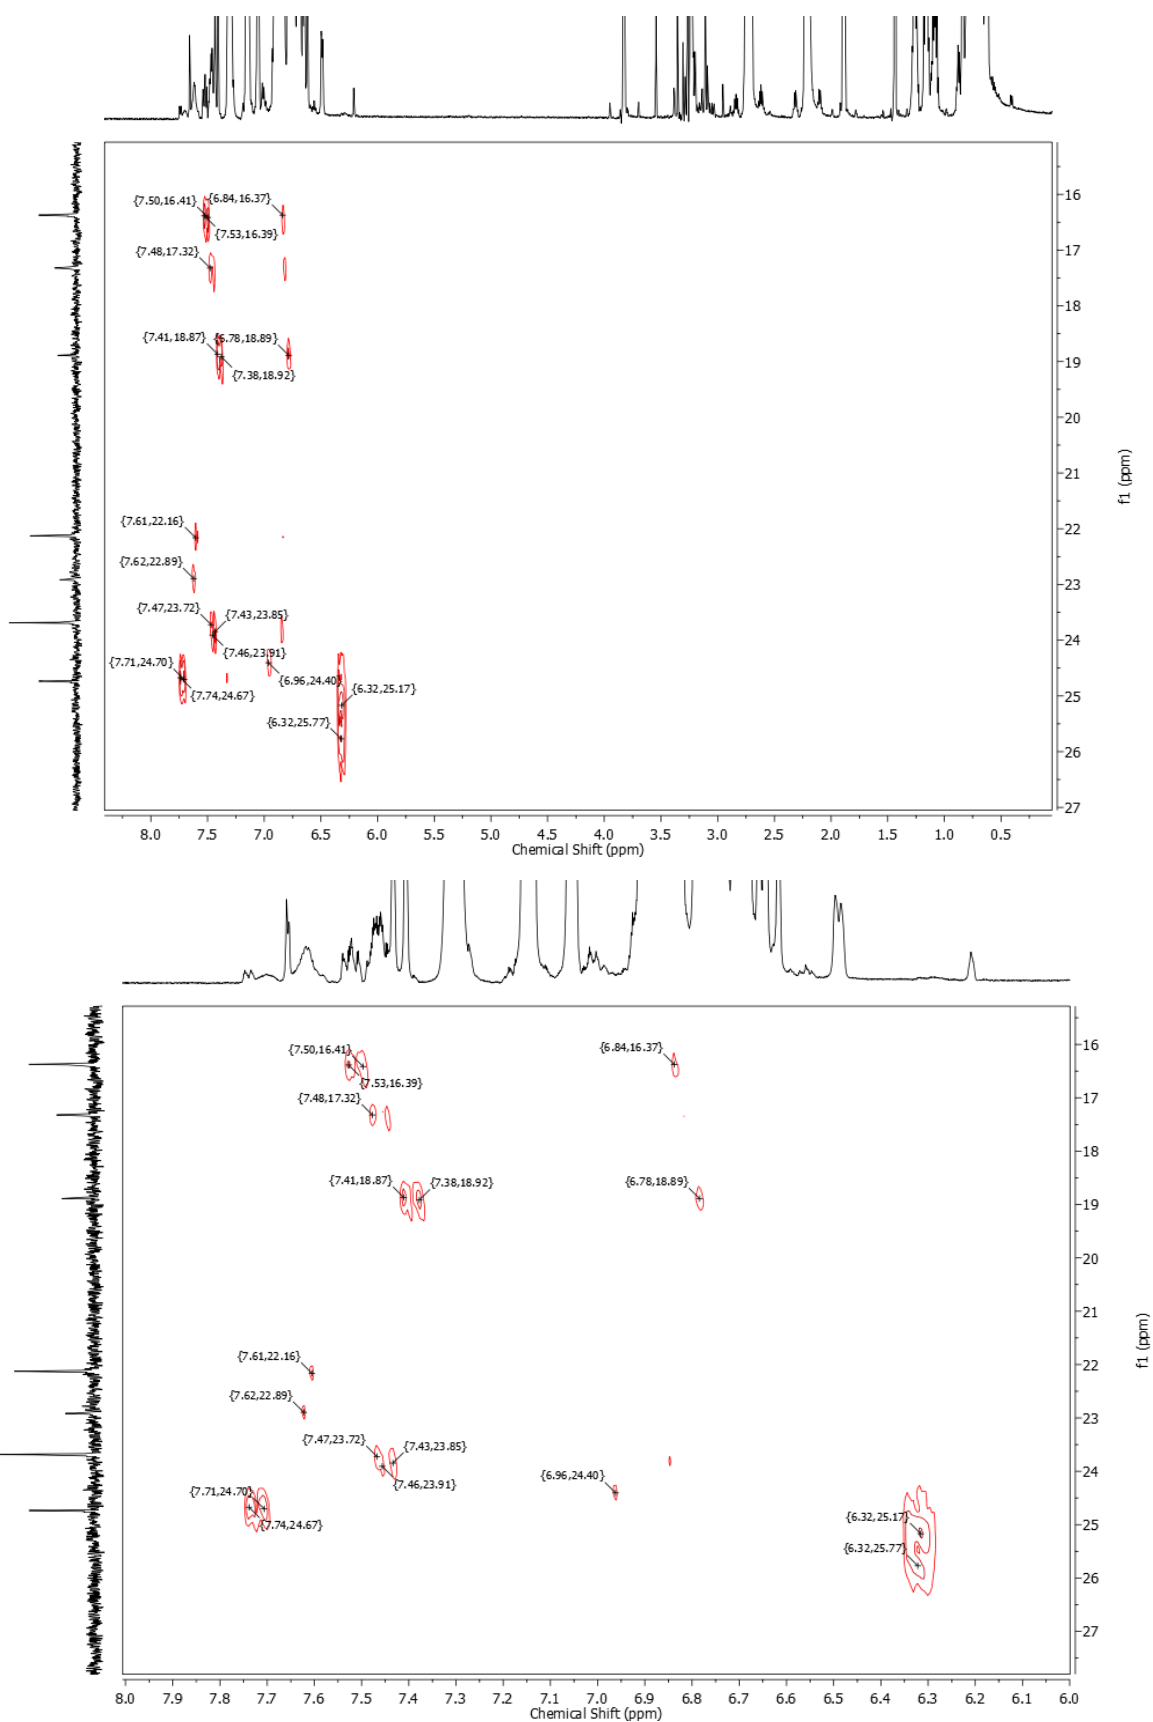

**Figure S23:**  $^{31}\text{P}$ - $^1\text{H}$  HMBC Spectrum of the model reaction under standard online NMR reaction conditions (top) with the  $\delta$ 8.00 – 6.00 region enhanced (bottom).

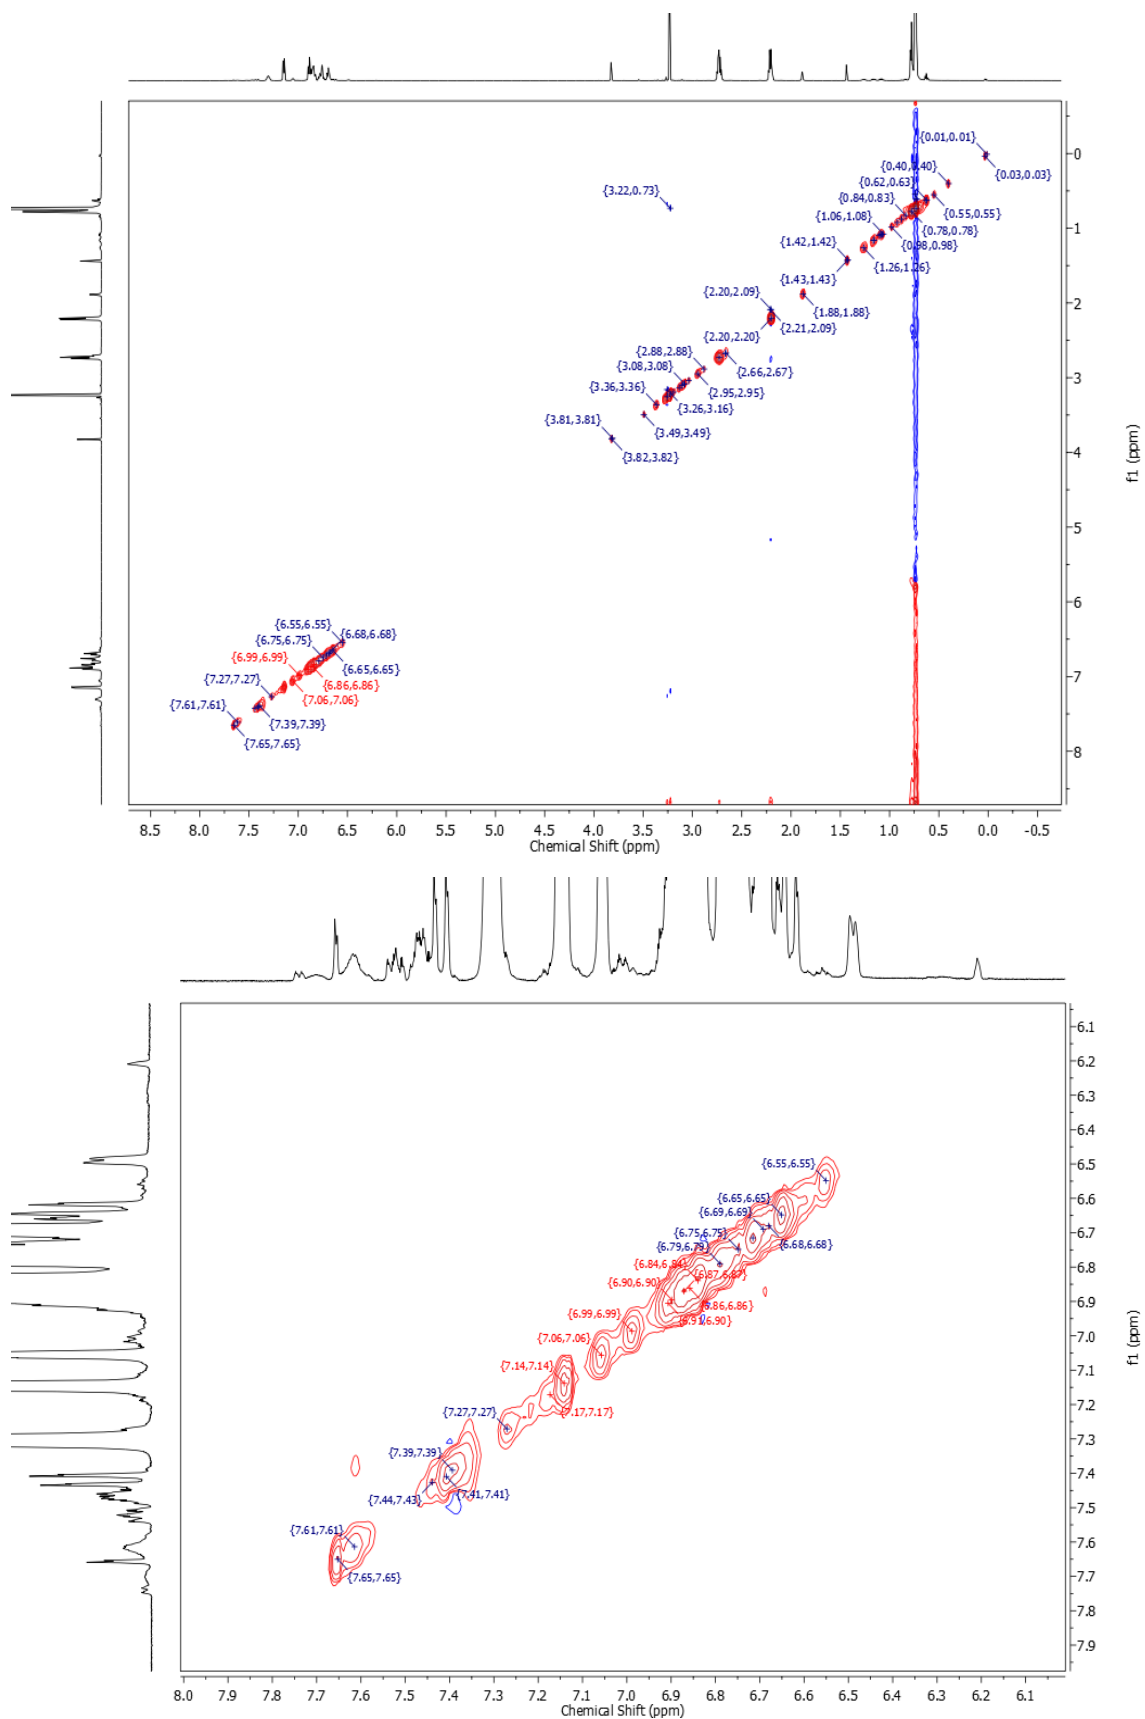

**Figure S24:** NOESY Spectrum of the model reaction under standard online NMR reaction conditions (top) with the  $\delta$ 8.00 – 6.00 ppm region enhanced (bottom).



## NMR Spectra of Novel/Uncolourised Compounds

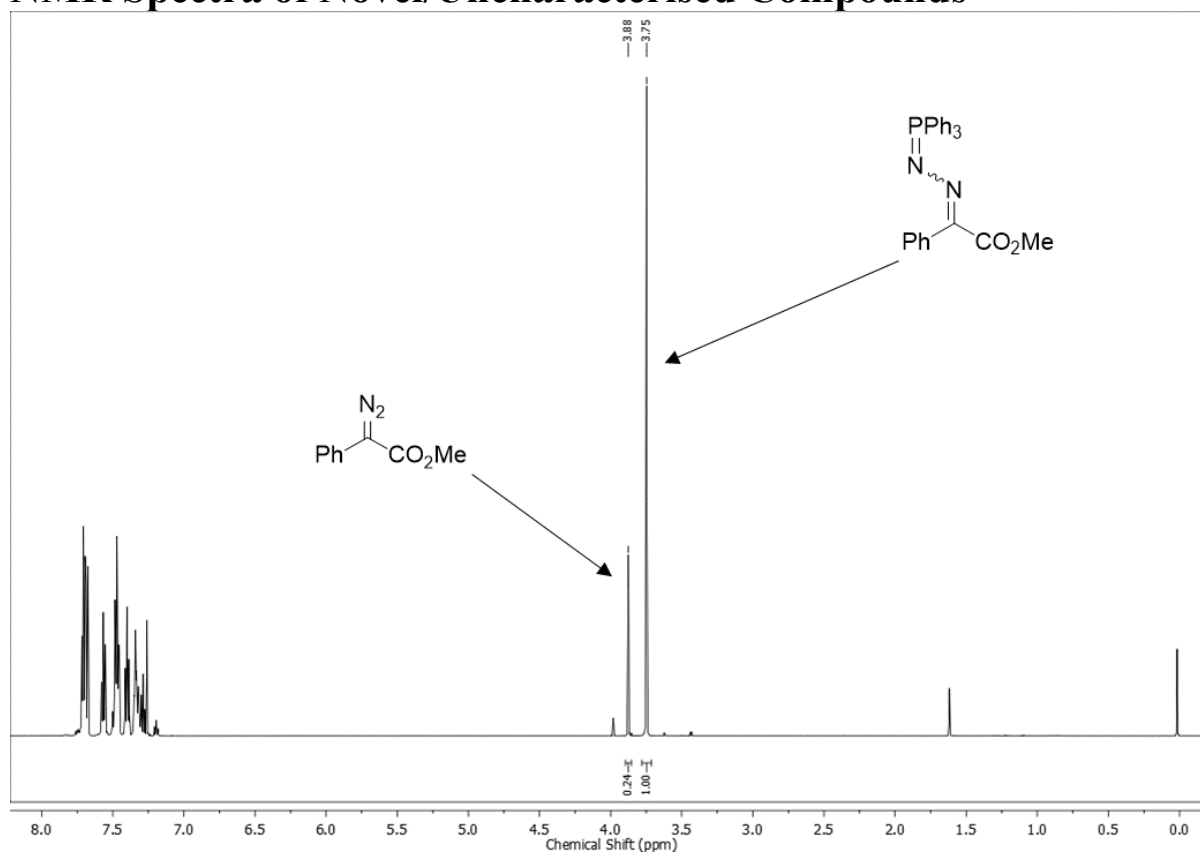

**Figure S26:** 600 MHz  $^1\text{H}$  NMR showing decomposition of **7** to liberate **1** upon dissolution in  $\text{CDCl}_3$ .

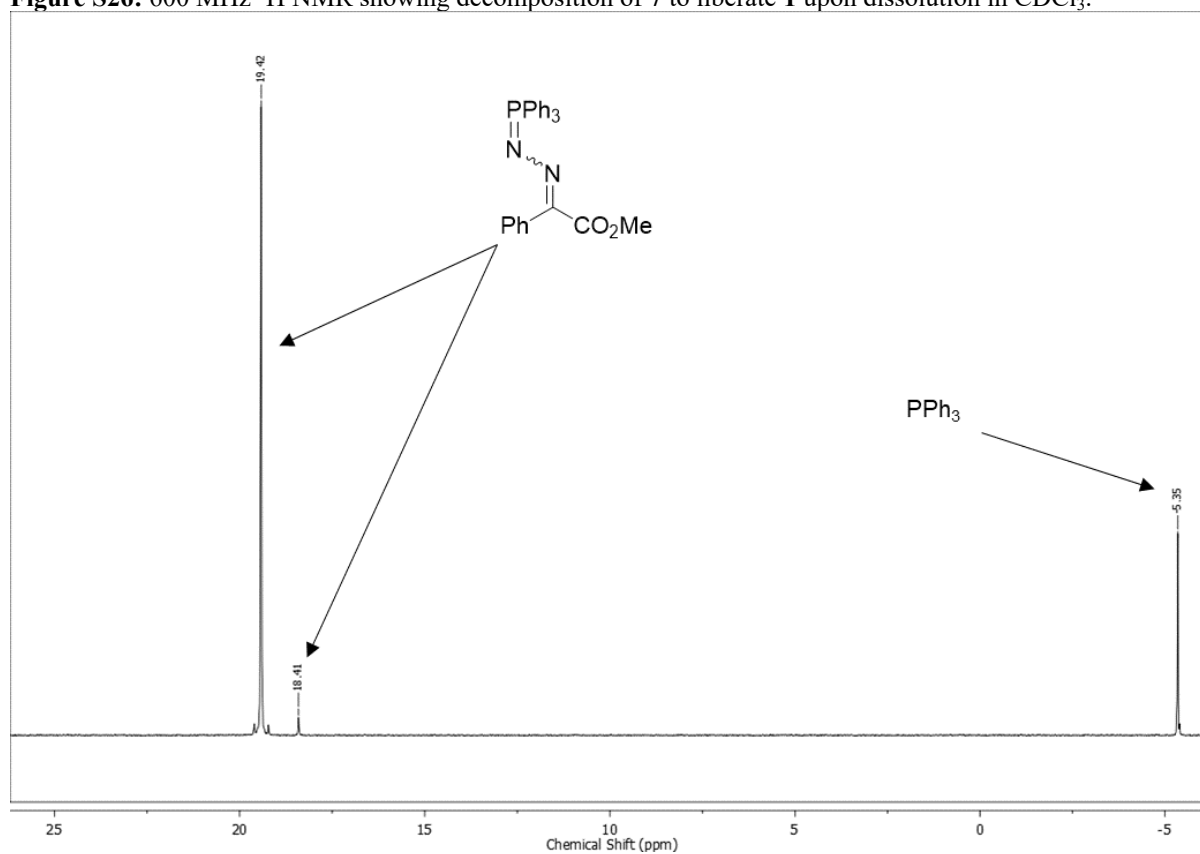

**Figure S27:** 243 MHz  $^{31}\text{P}\{^1\text{H}\}$  NMR showing decomposition of **7** to liberate  $\text{PPh}_3$  upon dissolution in  $\text{CDCl}_3$ .

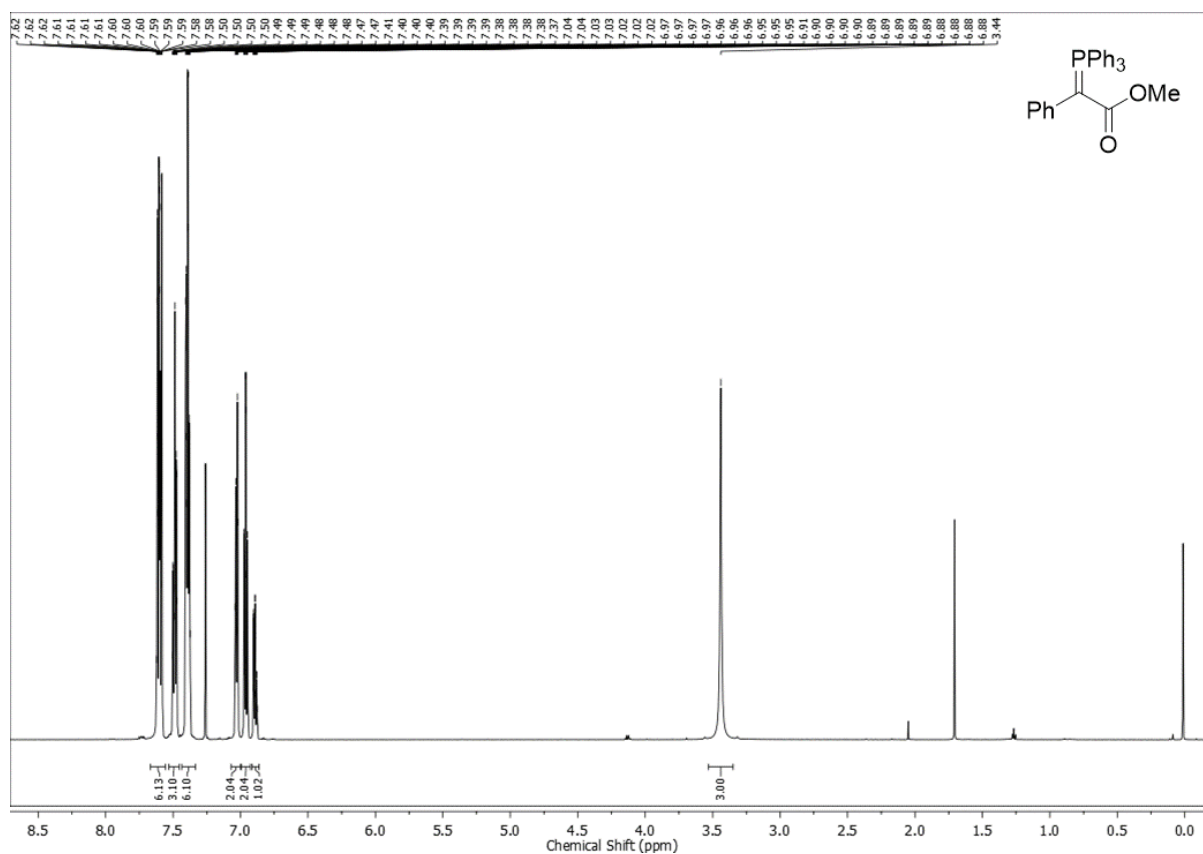

Figure S28: 600 MHz  $^1\text{H}$  NMR of **8** in  $\text{CDCl}_3$ .

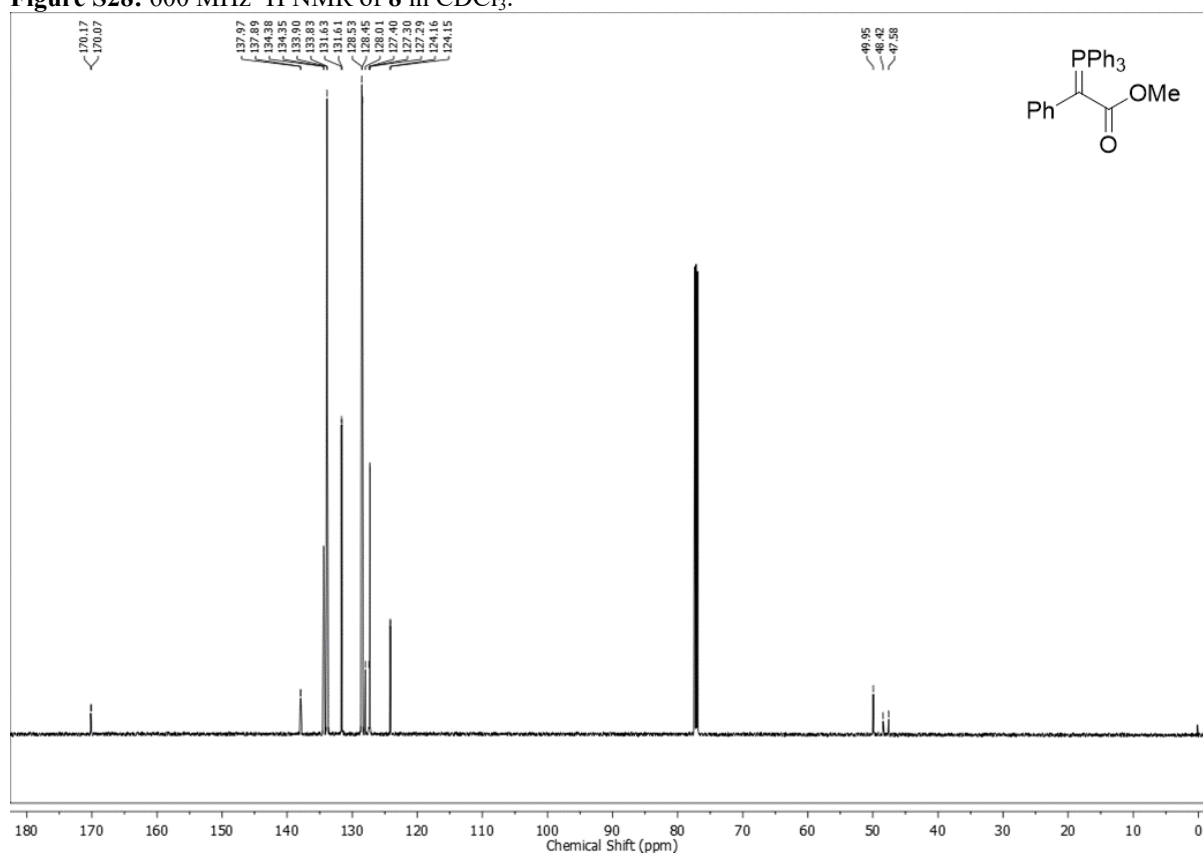

Figure S29: 151 MHz  $^{13}\text{C}$  NMR of **8** in  $\text{CDCl}_3$ .

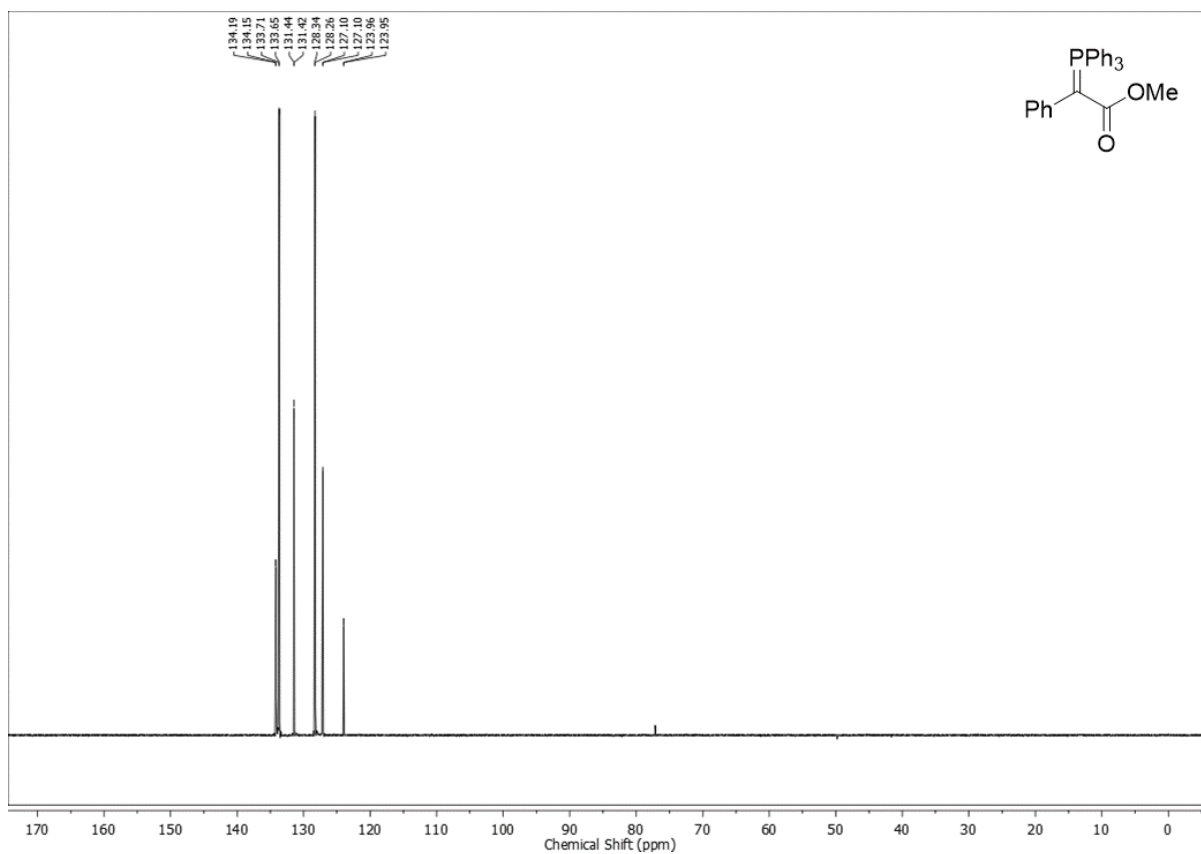

Figure S30: 151 MHz DEPT-90 NMR of **8** in  $\text{CDCl}_3$ .

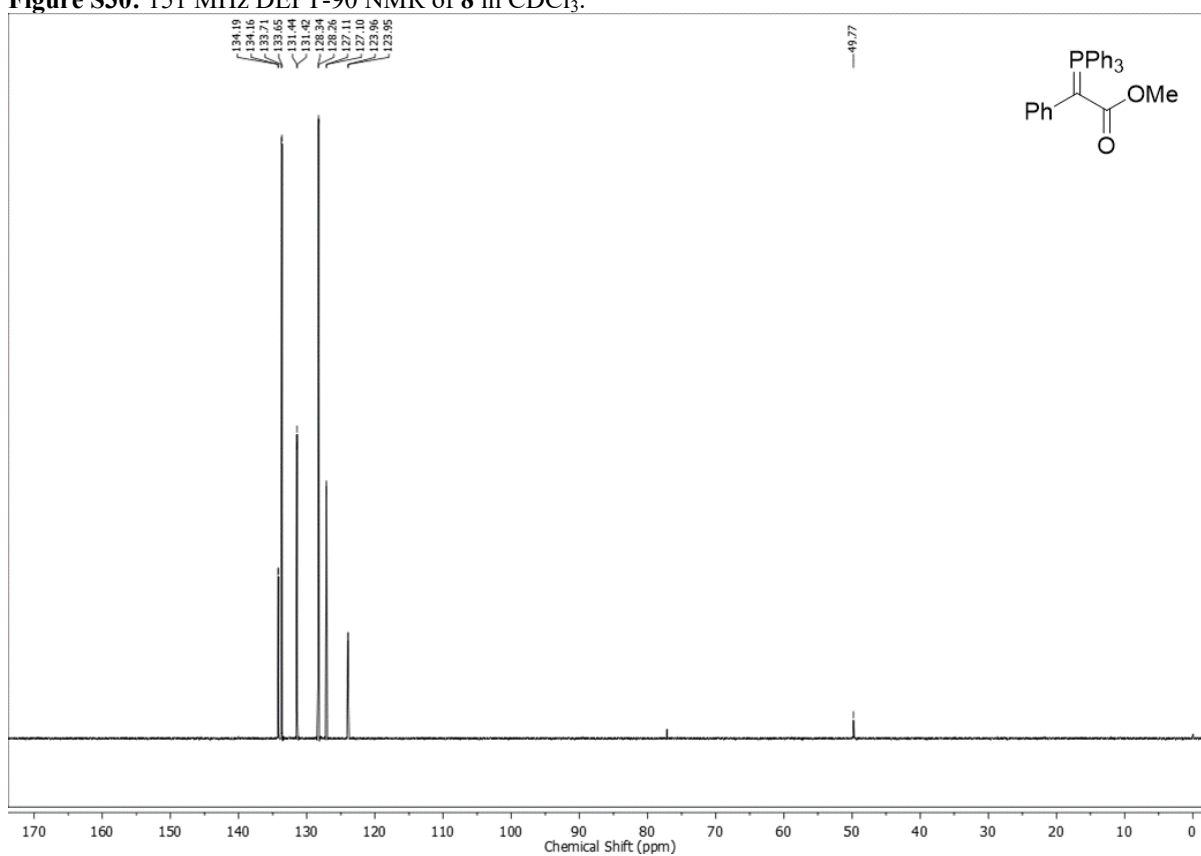

Figure S31: 151 MHz DEPT-135 NMR of **8** in  $\text{CDCl}_3$ .



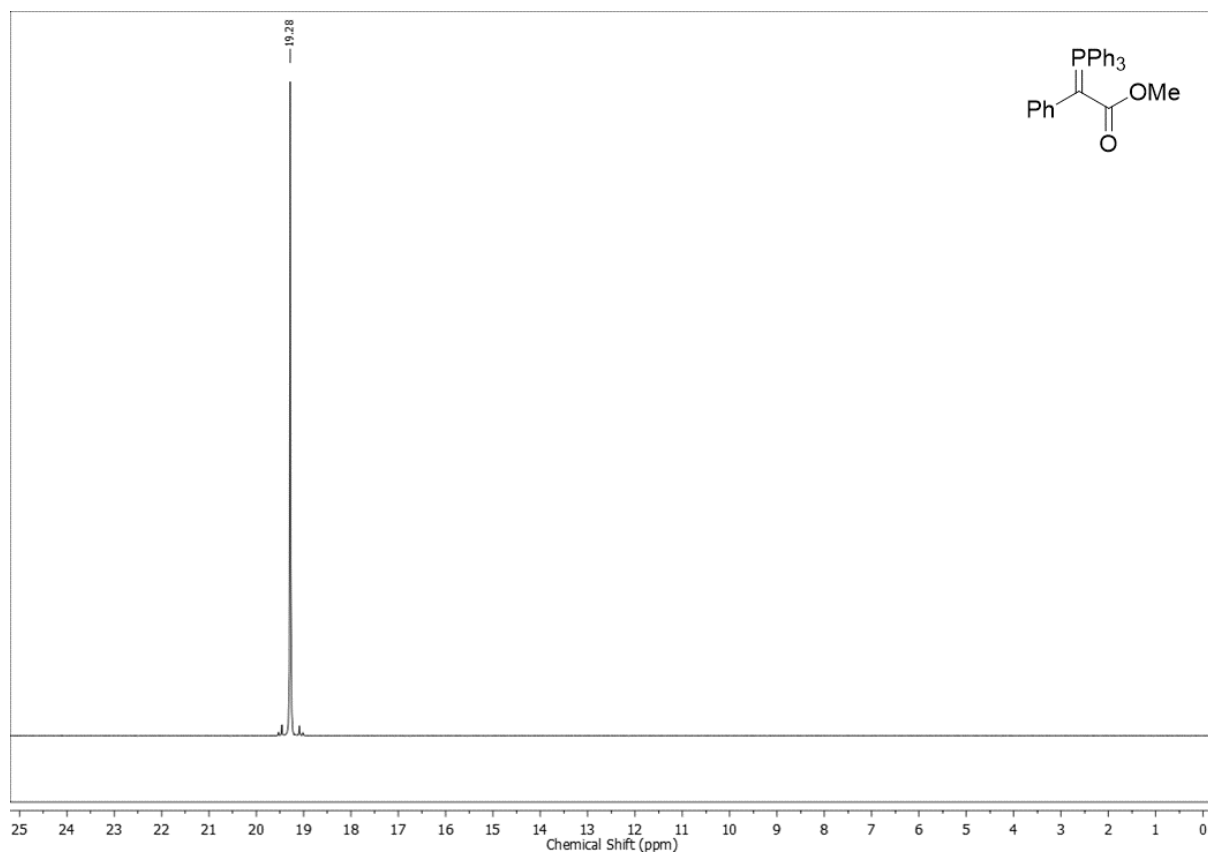

**Figure S32:** 243 MHz  $^{31}\text{P}\{^1\text{H}\}$  NMR of **8** in  $\text{CDCl}_3$ .

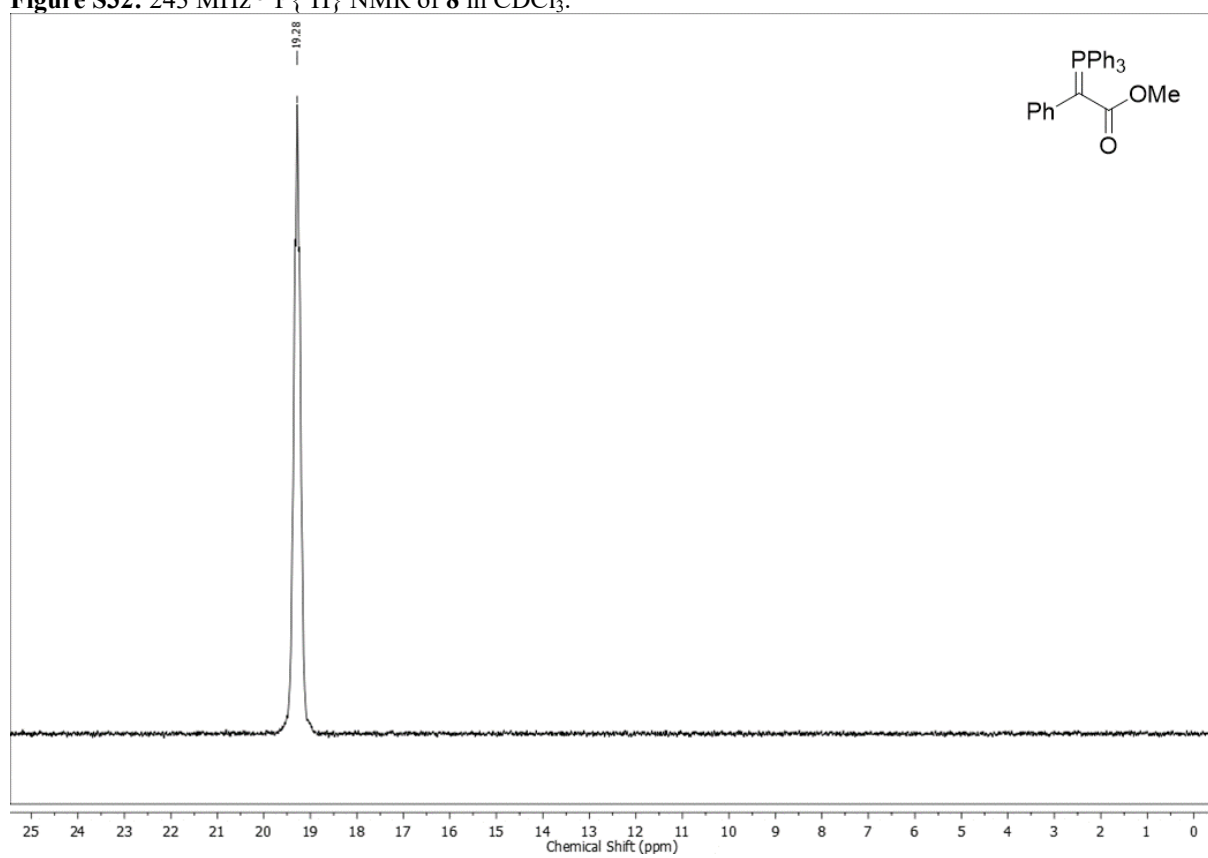

**Figure S33:** 243 MHz  $^{31}\text{P}$  NMR of **8** in  $\text{CDCl}_3$ .

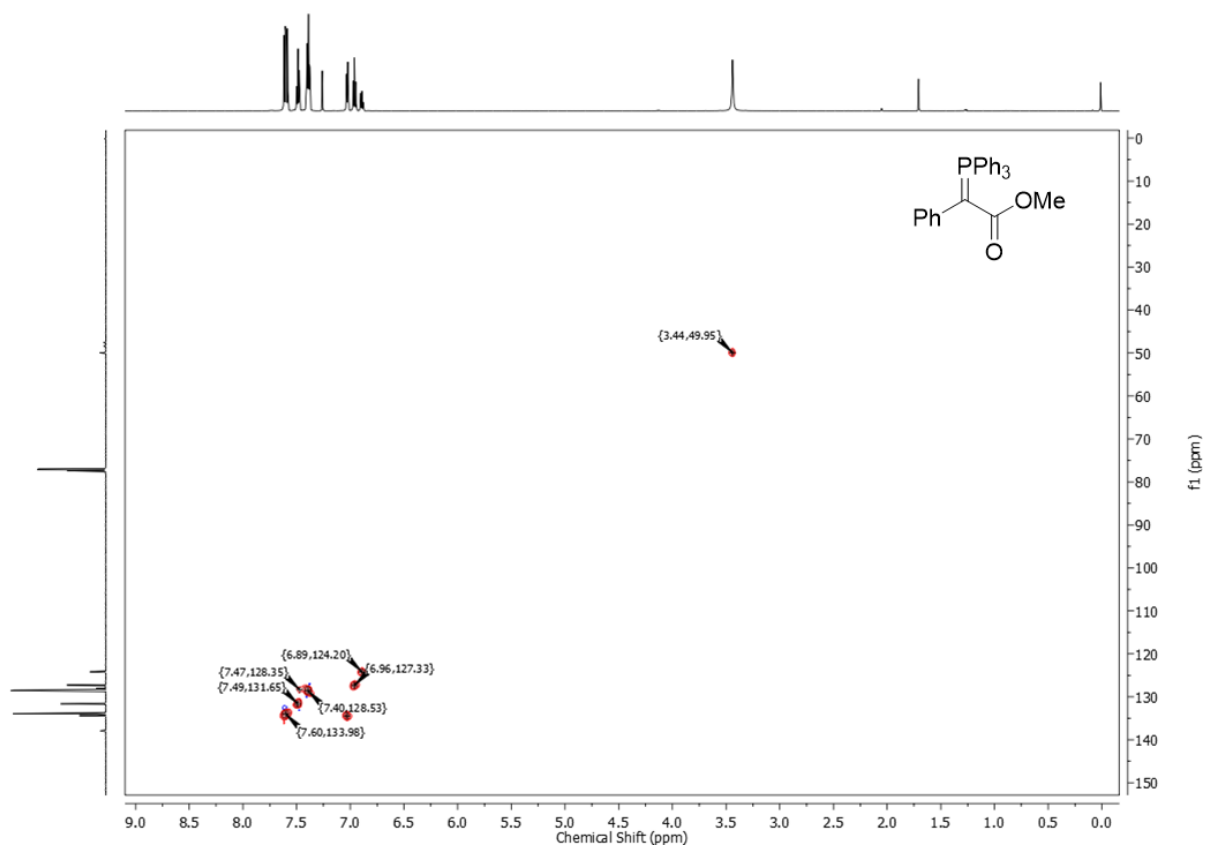

Figure S34: HSQC of **8** in CDCl<sub>3</sub>.

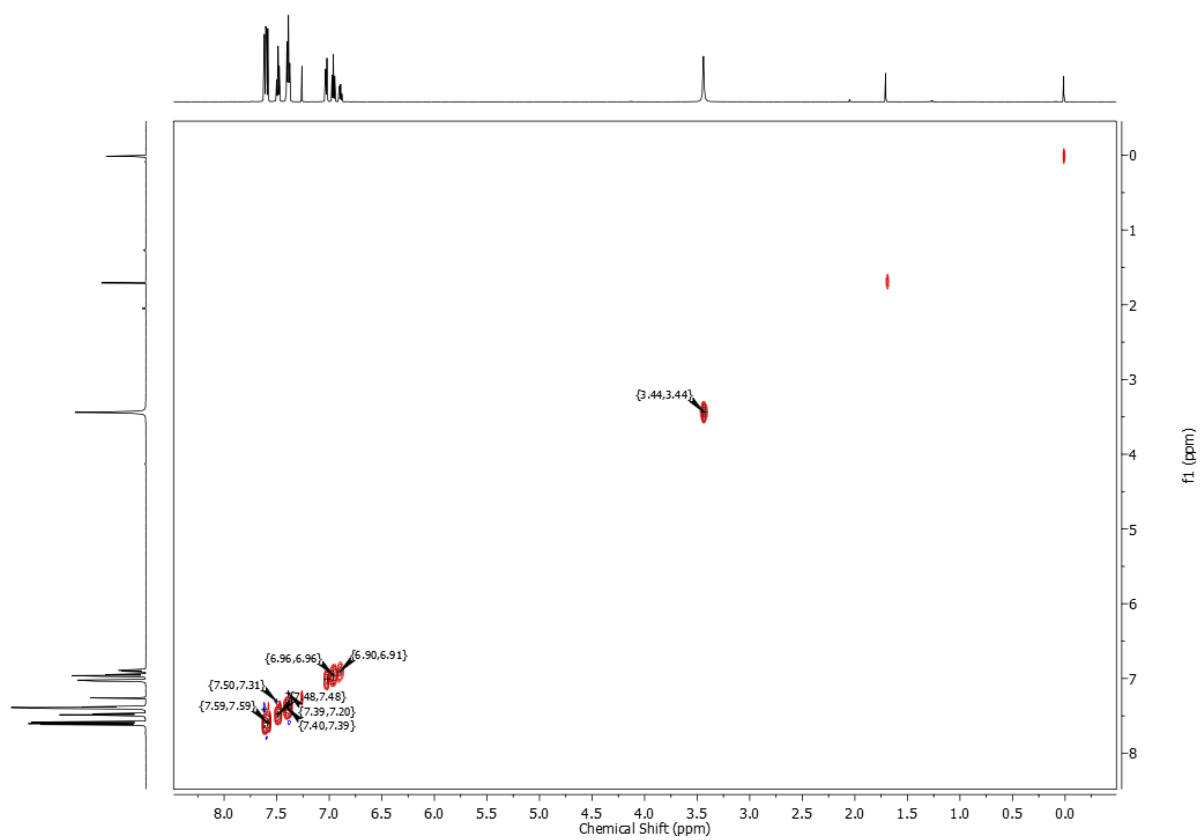

Figure S35: NOESY of **8** in CDCl<sub>3</sub>.

## Mass Spectrometry Analysis of Reaction Mixture

### General Procedure for Mass Spectrometry Analysis of Reaction Mixture

To an oven-dried microwave vial, 4-(trifluoromethyl)benzyl bromide **11** (0.1 mmol), PPh<sub>3</sub> (0.04 mmol), and Pd<sub>2</sub>(dba)<sub>3</sub>·CHCl<sub>3</sub> (0.005 mmol) was added. The microwave vial was sealed with a crimped cap then evacuated and flushed with dry N<sub>2</sub> gas three times followed by the addition of toluene (1 mL), and DIPEA (0.4 mmol). The mixture was allowed to stir at 80 °C for 5 min after which stirring was ceased and the reaction mixture was allowed to cool to room temperature. Methyl phenyldiazoacetate **1** (0.9 mmol) was then added to the reaction vessel and the reaction mixture was allowed to stir at 80 °C.

After *c.a* 15 min, an aliquot (1-3 droplets of undefined volume) was withdrawn from the reaction mixture using a disposable 1 mL syringe sparged with dry N<sub>2</sub> gas immediately prior to use and transferred to an oven-dried 1.8 mL glass screw-cap sample vial under inert atmosphere. The reaction sample was diluted in dry acetonitrile (1.0 – 1.2 mL) and the sample vial was capped under positive pressure of dry N<sub>2</sub> gas. The sample vial was wrapped in parafilm and immediately analysed *via* high resolution mass spectrometry using the ESI technique in positive-ion and negative-ion modes. Theoretical *m/z* values and isotopic distributions were calculated using MassLynx 4.1 software and signals were assigned in accordance with literature protocols out.<sup>31</sup>

For LC/HRMS, the sample was analysed using a Waters Xevo G2-XS QTOF mass spectrometer. Here, the sample was placed onto the autosampler of the instrument and autonomously injected with the analytes being ionized according to the conditions in Table S28.

**Table S28:** Waters Xevo G2-XS QTOF instrument settings used here in positive-ion and negative-ion modes.

| Source                  | Positive Ion Mode Setting | Negative Ion Mode Setting |
|-------------------------|---------------------------|---------------------------|
| Capillary (kV)          | 3.0000                    | 3.0000                    |
| Sampling Cone           | 50.0000                   | 50.0000                   |
| Source Temperature (°C) | 150                       | 150                       |
| Source Offset           | 80                        | 80                        |
| Desolvation Temp. (°C)  | 350                       | 450                       |

For direct sample infusion analysis, the sample was analysed using an Advion Nanomate mass spectrometer with the sample being manually dispensed directly into the ionization segment of the instrument. Here, an aliquot of the original sample (100 µL) was diluted in acetonitrile (1 mL) then an aliquot of this solution (10 µL) was further diluted in acetonitrile (1 mL) with the twice-diluted solution being used for analysis. Analytes were ionized according to the conditions in Table S29.

**Table S29:** Advion Nanomate instrument settings used here in positive-ion and negative-ion modes.

| Source                  | Positive Ion Mode Setting | Negative Ion Mode Setting |
|-------------------------|---------------------------|---------------------------|
| Capillary (V)           | 3400.0                    | 3500.0                    |
| Sample Cone (V)         | 120.0                     | 120.0                     |
| Source Temperature (°C) | 130.0                     | 130.0                     |
| Desolvation Temp. (°C)  | 20.0                      | 400.0                     |
| MCP Detector (V)        | 2050.0                    | 2000.0                    |

## High Resolution Mass Spectra

Due to the operational nature of the HRMS equipment, an absolute inert atmosphere of the sample was not guaranteed during this analysis. Organometallic decomposition is evident from the small signals scattered throughout the spectra making total spectral assignment difficult.<sup>32</sup> HRMS results were duplicated over two independent experiments using separate reaction samples under identical operating conditions.

The de-brominated, bis-phosphine ligated oxidative addition complex **14** was observed in positive-ion mode using both LC/HRMS and direct sample infusion HRMS methods (Figure S36 and Figure S38, respectively) with good agreement between the theoretical and experimental isotopic distribution pattern for the same complex (Figure S37 and Figure S39).

The de-brominated, bis-phosphine ligated  $\beta$ -hydride elimination precursor complex **15** was only detected *via* LC/HRMS in positive-ion mode (Figure S40), again with good agreement between the theoretical and experimental isotopic distribution pattern (Figure S41). Due to the more dilute nature of the direct infusion MS sample and the low relative abundance of complex **15** (see Figure S36 and Figure S40) it is expected that this complex may not be detected *via* direct infusion HRMS analysis, however decomposition of the complex may have also contributed to this species' absence.

In both cases, free bromide was observed in negative-ion mode analysis of the samples validating the de-brominated nature of the observed structures for **14** and **15**.

ASEP\_24JAN\_2022\_206 22 (0.448) Cm (22:42)

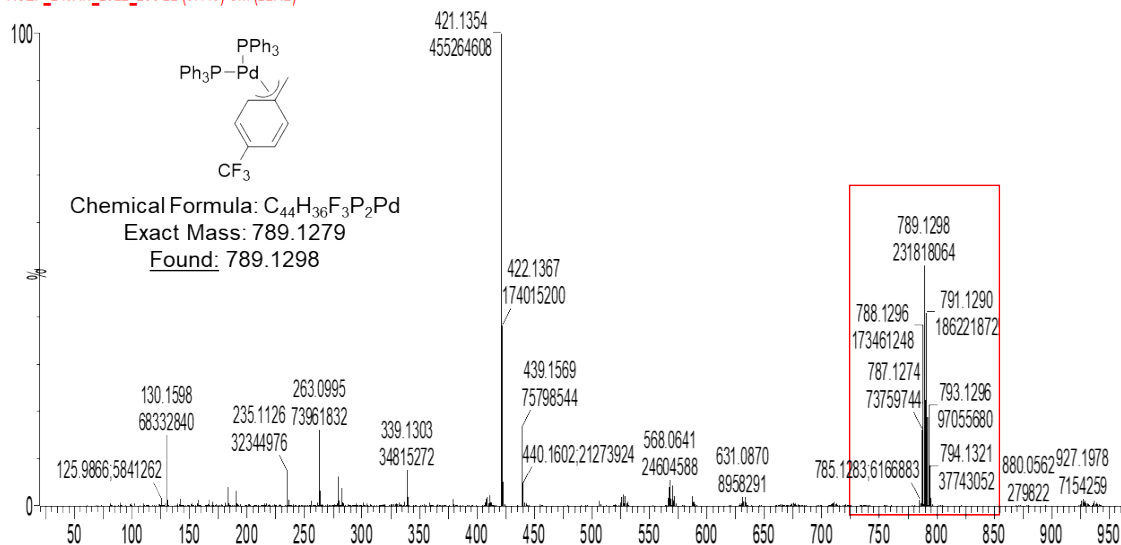

**Figure S36:** High resolution mass spectrum of crude reaction mixture obtained *via* LC/HRMS in positive-ion mode with the characteristic signal of the oxidative addition complex **14** highlighted in red.

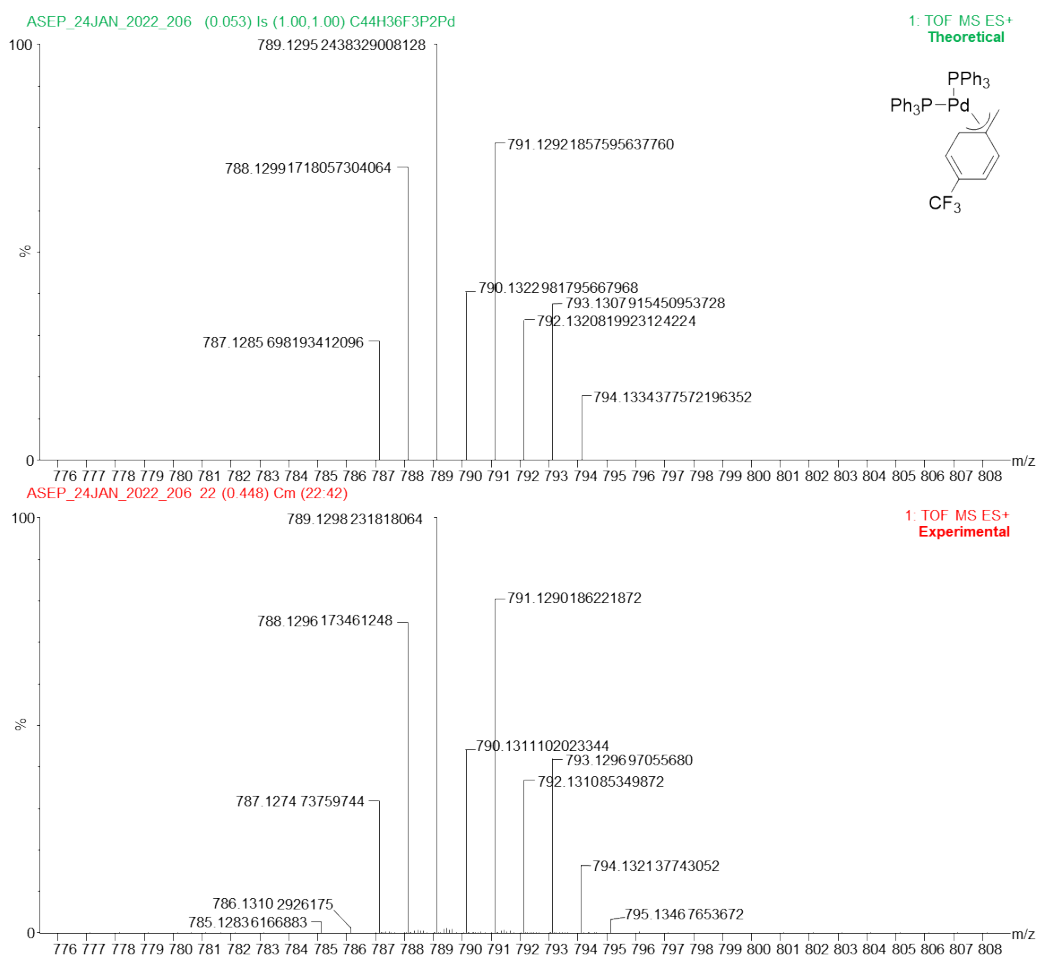

**Figure S37:** Enhanced LC/HRMS spectrum of the crude reaction mixture with the theoretical isotopic distribution of the oxidative addition complex **14** (top) and experimentally observed signal (bottom).

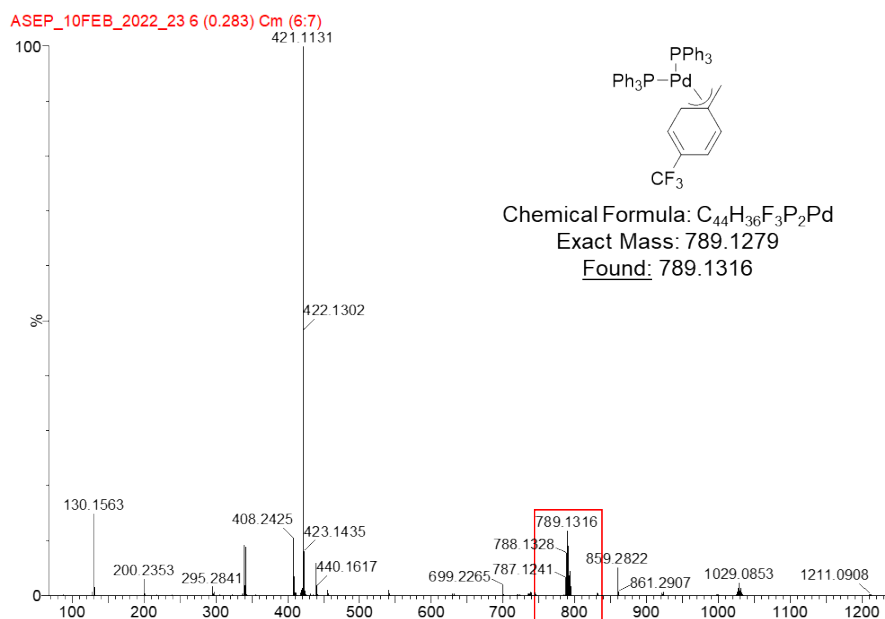

**Figure S38:** High resolution mass spectrum of crude reaction mixture obtained *via* direct infusion HRMS in positive-ion mode with the characteristic signal of the oxidative addition complex **14** highlighted in red.

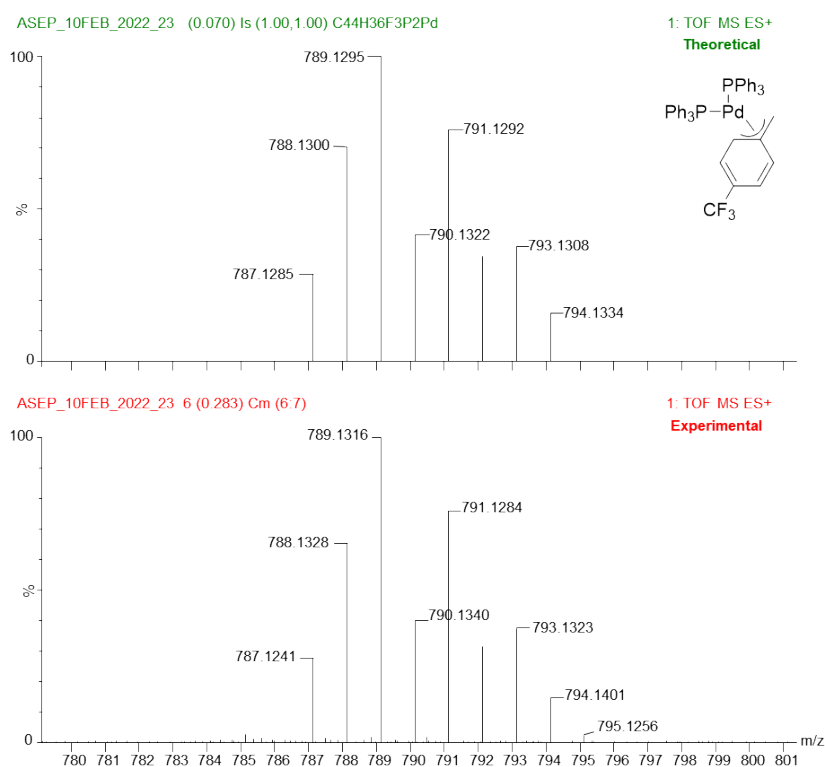

**Figure S39:** Enhanced HRMS spectrum obtained *via* direct infusion HRMS of the crude reaction mixture with the theoretical isotopic distribution of the oxidative addition complex **14** (top) and experimentally observed signal (bottom).

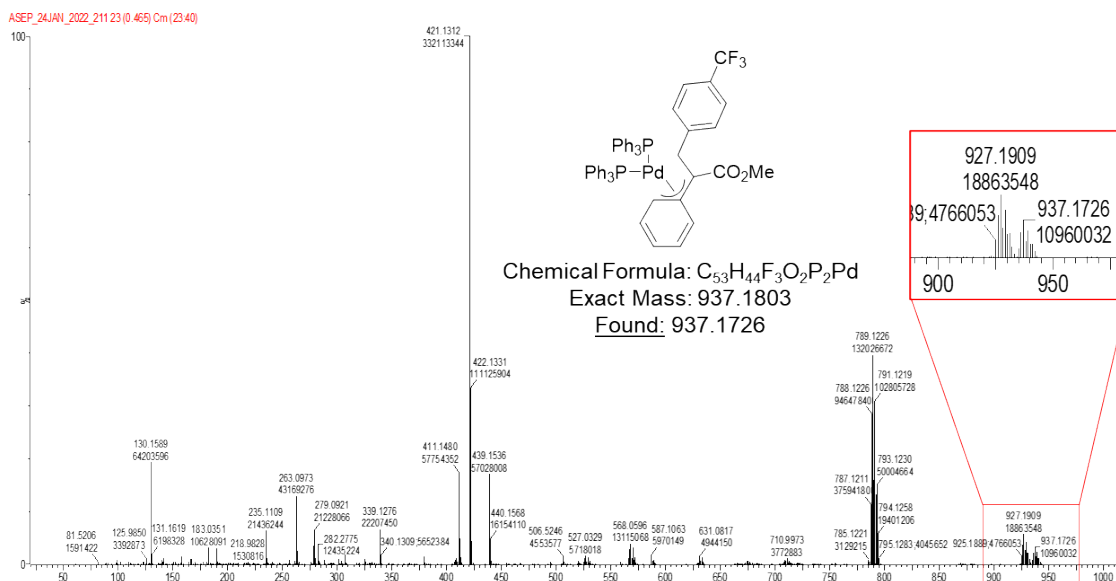

**Figure S40:** High resolution mass spectrum of crude reaction mixture obtained *via* LC/HRMS in positive-ion mode with the characteristic signal of the  $\beta$ -hydride elimination precursor complex **15** highlighted in red.

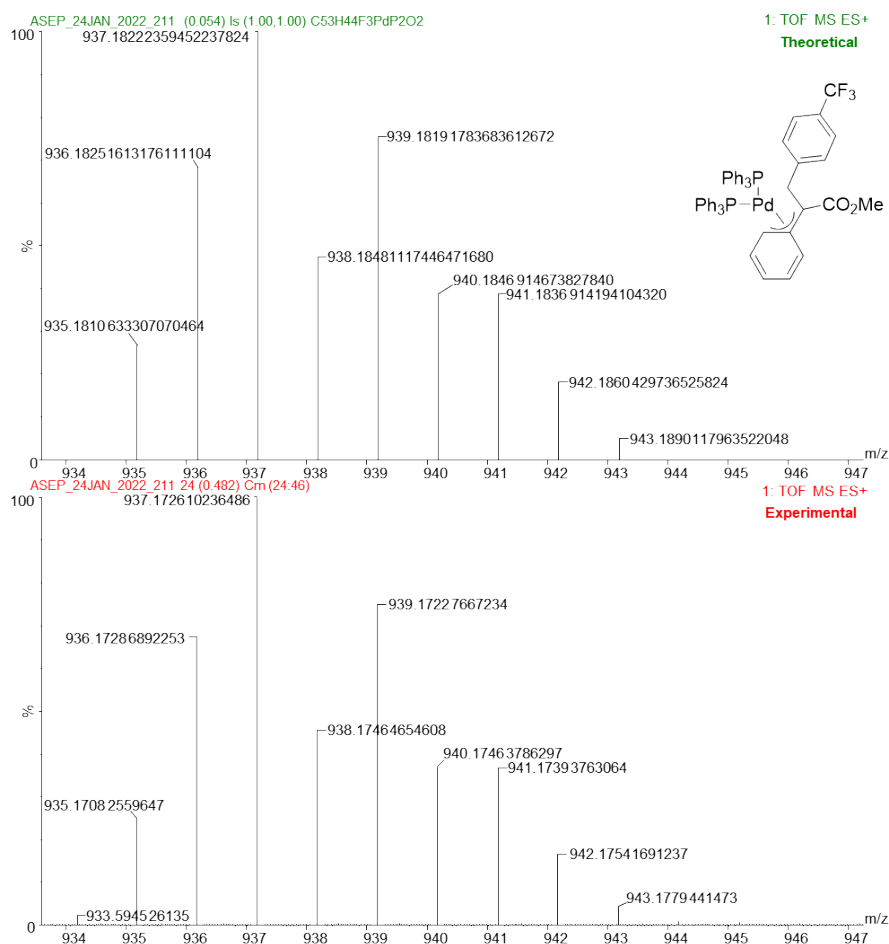

**Figure S41:** Enhanced LC/HRMS spectrum of the crude reaction mixture with the theoretical isotopic distribution of the  $\beta$ -hydride elimination precursor **15** complex (top) and experimentally observed signal (bottom).

## Computational Details

### Computational Methods

All optimisation, frequency, and single point calculations were performed with *Gaussian 16*, rev C.01. The hybrid B3PW91<sup>33-35</sup> functional was used for all geometry optimisation with the 6-31G(d,p) basis set on all non-metal atoms and the SDD<sup>36</sup> valence basis set and pseudopotential to describe Pd. Grimme's DFT-D3<sup>37</sup> correction was included in the optimisation procedure. Transition states on the potential energy surface were located using scans and a coordinate driving methodology. All optimised structures were confirmed as either minima or saddle points by the presence of zero or one imaginary harmonic frequency respectively. All transition states were further analysed via intrinsic reaction coordinate (IRC) calculations to ensure intermediates connected to their corresponding transition state structures. On the basis of the optimised structures, single point refinements with the 6-311+G(d,p) basis set for non-metal atoms and the SDD<sup>36</sup> valence basis set and effective core potential pairing for Pd. Grimme's DFT-D3<sup>37</sup> correction was again included as were further corrections for bulk solvation through a polarisable continuum model (PCM)<sup>38</sup> approach (toluene). Free energies were determined from thermochemical corrections of the geometries applied to electronic energies. Considerable care was taken to identify low energy conformers of intermediates and transition states through extensive conformational sampling. All structures reported are the most energetically stable of those sampled. Non-covalent interaction (NCI) surfaces were calculated using promolecular densities in nciplot.<sup>39</sup> Structures are displayed with PyMOL, shamelessly rendered with the excellent Paton group display settings.<sup>40</sup>



## Carbene Trans to Br

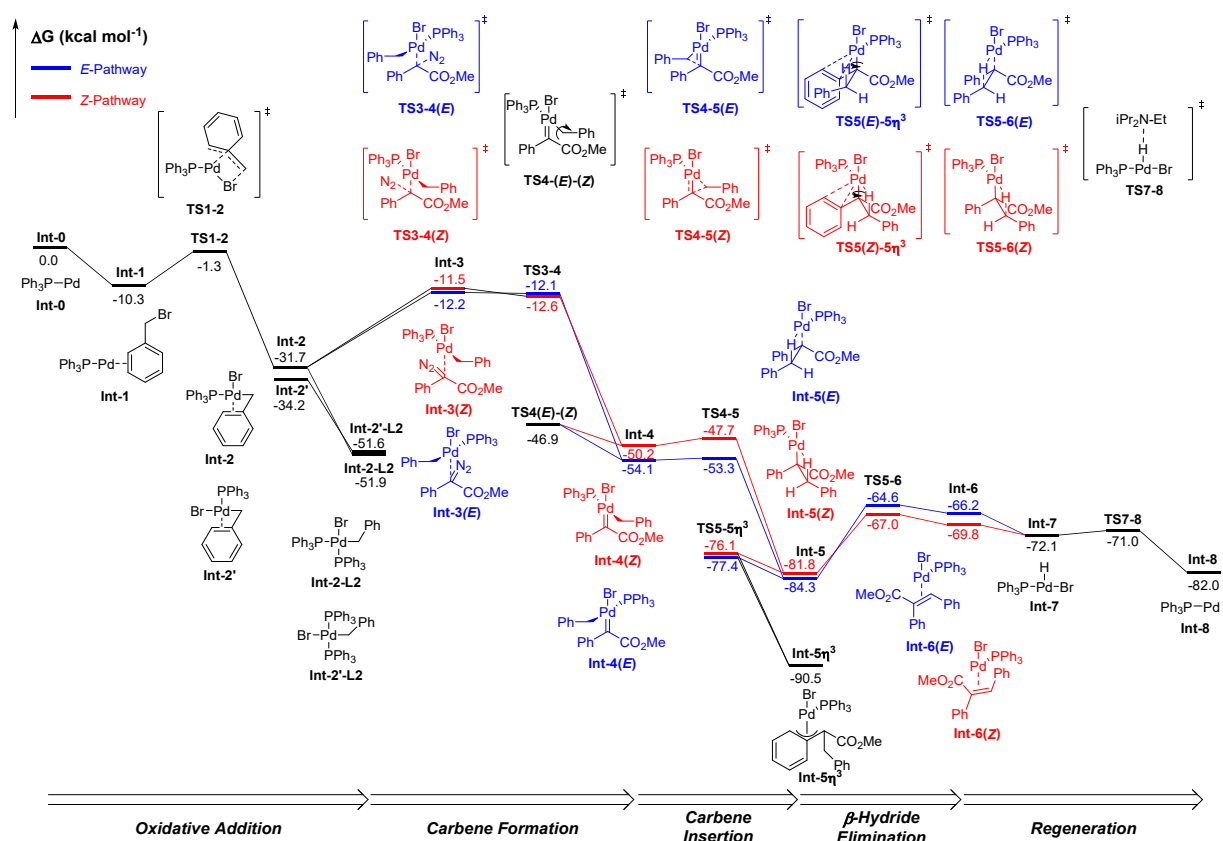

**Figure S42:**Free energy profiles for the alternative, higher energy, catalytic cycle in which the carbene forms trans to bromine, showing the major (*E*)-selective (blue) and minor (*Z*)-selective (red) reaction pathways. Theoretical reaction analysis performed at B3PW91-D3-PCM<sub>Toluene</sub>/6-311+G(d,p)/SDD//B3PW91-D3/6-31G(d,p)/SDD energies are Gibbs free energies in kcal mol<sup>-1</sup>.

Two isomers of the oxidative addition product exist, **Int-2** and **Int-2'**, meaning there are two potential vacant sites on palladium at which to form the carbene during **TS3-4**. The pathway in which the carbene forms trans to the bromine ligand of **Int-2** was found to be unproductive, Figure S42. Here, **TS3-4** 1.4 kcal mol<sup>-1</sup> higher than productive pathway details in main body of paper in which the carbene forms trans to the PPh<sub>3</sub> ligand of **Int-2'**. Nevertheless, we fully investigated this pathway as well to contrast and compare the behaviour of the two possible mechanisms. Carbene insertion **TS4-5** is highly *E*-selective, favoured by 5.6 kcal mol<sup>-1</sup>, much like the productive pathway. The same favourable HOMO-LUMO overlap is observed in the pro-(*E*) transition state, Figure S43.

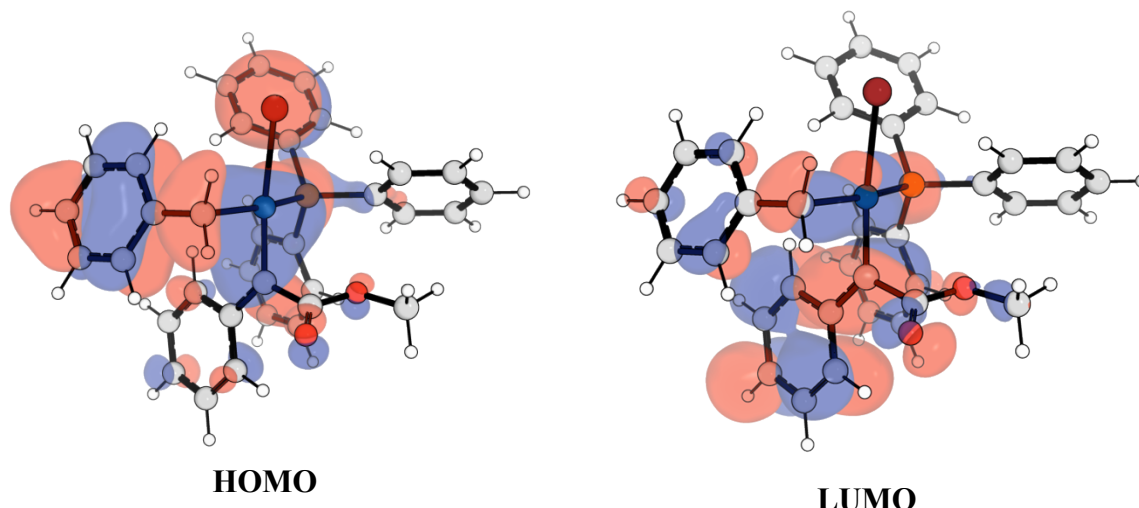

**Figure S43:** Molecular orbitals of Pd-carbene **TS4-5(E)** in the trans Br pathway where the HOMO resides predominantly on the migrating benzyl group and the LUMO predominantly on the carbene phenyl ring.

However, the barrier for rotation between **Int-4(E)** and **Int-4(Z)** is higher than the barrier to carbene insertion **TS4-5** making equilibration at this step much less likely than in the productive pathway. It is unlikely that carbene insertion could set selectivity in this pathway.  $\beta$ -hydride elimination, **TS5-6**, is much higher in energy than in the productive pathway, by 4.5-8.8 kcal mol<sup>-1</sup>, which has significant consequences. Firstly, the barrier to rotation via **TS5-5 $\eta^3$** , of a similar magnitude to the productive pathway, is 9.1 kcal mol<sup>-1</sup> lower than  $\beta$ -hydride insertion **TS5-6**. This equilibration can now be thought of as rapid, meaning a Curtin-Hammett like situation is operating. Any selectivity set earlier in the catalytic cycle will be nullified by the rapid equilibration, meaning it is likely  $\beta$ -hydride elimination is the selectivity determining step. However, **TS5-6(Z)** is 2.4 kcal mol<sup>-1</sup> lower in energy than **TS5-6(E)**, resulting in 58:1 Z-product selectivity. The prediction of high (Z)-selectivity for this catalytic cycle goes against the high (E)-selectivity overwhelmingly observed in experiment. Neither can this possibly pathway account for the differences in experimentally observed selectivity for changes in starting material (Scheme 2). Together, the evidence suggest that this pathway is not operating and that carbene formation must occur trans to PPh<sub>3</sub> from intermediate **Int-2'**.

### Carbene Intermediate Int-4 Dispersion Effects

The thermodynamic preference for carbene intermediate **Int-4(E)** over **Int-4(Z)** is not due to similar HOMO-LUMO overlap, as is suggested for the preceding migratory insertion transition state but is more likely the result of favourable non-covalent interactions (Figure S44). **Int-4(E)** is favoured due to what appears to be two strong CH- $\pi$  interactions between the benzyl ring and the triphenylphosphine ligand as well as the benzyl and carbene phenyl rings. Removal of dispersion corrections at SP level in fact results in the pro-(Z) carbene **Int-4(Z)** being favoured by 0.8 kcal mol<sup>-1</sup>.

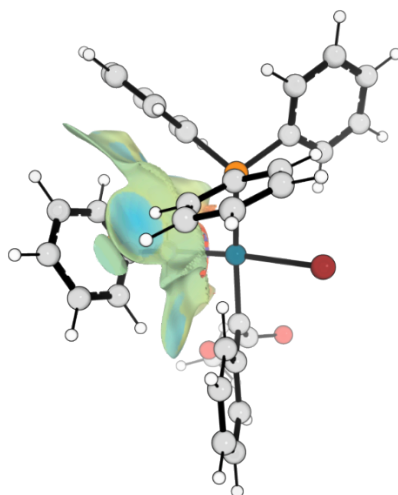

**Figure S44:** Noncovalent interactions favouring **Int-4(E)**. NCI cutoffs 0.01 and 1. The colour spectrum ranges from blue (strongly attractive) to green (weakly attractive) to yellow (mildly repulsive) to red (strongly repulsive).

## Computational vs Experimental Selectivities

Both carbene insertion (TS4-5) and  $\beta$ -hydride elimination (TS5-6) are (*E*)-selective. However, the degrees of selectivity are different. Carbene insertion, with 3.5 kcal mol<sup>-1</sup> favouring pro-(*E*) selectivity at TS4-5(*E*) over TS4-5(*Z*) would result in near perfect selectivity of 372:1 in favour of Int-5(*E*). From Int-5(*E*),  $\beta$ -hydride elimination at TS5-6(*E*) favours the (*E*)-product over the (*Z*)-product forming TS5-6(*Z*) by 1.9 kcal mol<sup>-1</sup>, leading to a predicted (*E*)-selectivity of 25:1. The absolute values of these predicted selectivities suffer from inaccuracies related both to DFT and the application of simple transition state theory. These values do allow boundaries for each scenario to be set, depending on the degree of interconversion prior to  $\beta$ -hydride elimination, selectivity with a pendant migrating group will be in the range 372-25:1, whereas if selectivity is set solely during  $\beta$ -hydride insertion it can be no higher than 25:1. Although these are not quantitative, the calculated selectivities for each of these steps qualitatively match experimental results (Scheme 2) where a reaction at which selectivity can be determined during migratory insertion has much higher (*E*)-selectivity (>20:1) than a reaction at which selectivity can only occur during  $\beta$ -hydride elimination (5:1).

### $c\beta$ -H Elimination TS5-6(*E*) Dispersion Effects

(*E*)-selectivity during  $\beta$ -hydride elimination is not immediately expected, at first glance it would seem that the steric clash between phenyl groups would disfavour this transition state. Stabilising non-covalent interactions, particularly between the triphenylphosphine ligand and phenyl ring of the product coming from the benzyl group appear to be the cause of the added stability of the pro-(*E*) pathway in comparison to the pro-(*Z*) (Figure S45). Removal of dispersion corrections during SP results in a drop from 1.9 to 0.2 kcal mol<sup>-1</sup> preference for pro-(*E*).

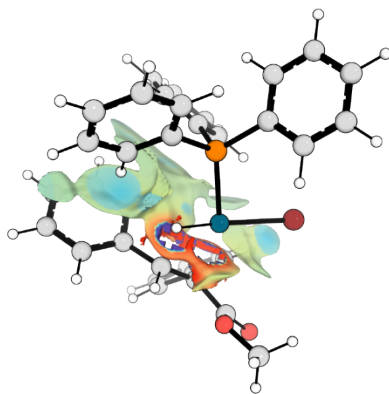

**Figure S45:** Strong non-covalent interaction between triphenylphosphine ligand and phenyl group of product during  $\beta$ -hydride elimination appears to preferentially stabilize the pro-(*E*) pathway **TS5-6(E)**. NCI cutoffs 0.01 and 1. The colour spectrum ranges from blue (strongly attractive) to green (weakly attractive) to yellow (mildly repulsive) to red (strongly repulsive).

## Cartesian Coordinates

### Starting Materials and Products

**2** (benzyl bromide)

Energy: -1783742.0168202

|    |          |          |          |
|----|----------|----------|----------|
| C  | 3.21567  | -0.19994 | -0.44471 |
| C  | 2.45092  | -1.29833 | -0.04873 |
| C  | 1.16141  | -1.11055 | 0.43618  |
| C  | 0.62139  | 0.17681  | 0.53553  |
| C  | 1.39010  | 1.27099  | 0.12995  |
| C  | 2.68267  | 1.08433  | -0.35552 |
| H  | 4.22334  | -0.34637 | -0.82291 |
| H  | 2.86152  | -2.30148 | -0.11940 |
| H  | 0.55719  | -1.96473 | 0.73113  |
| H  | 0.97262  | 2.27274  | 0.19396  |
| H  | 3.27265  | 1.94232  | -0.66477 |
| C  | -0.75855 | 0.37250  | 1.06624  |
| H  | -0.98530 | -0.28826 | 1.90320  |
| H  | -0.95988 | 1.40644  | 1.34566  |
| Br | -2.12925 | -0.07130 | -0.29944 |

**1** (diazot)

Energy: -381197.4901761

|   |          |          |          |
|---|----------|----------|----------|
| C | -3.69184 | -0.51217 | -0.00002 |
| C | -2.74728 | -1.53556 | 0.00035  |
| C | -1.38399 | -1.25434 | 0.00036  |

|   |          |          |          |
|---|----------|----------|----------|
| C | -0.93971 | 0.07769  | 0.00000  |
| C | -1.89807 | 1.10595  | -0.00040 |
| C | -3.25622 | 0.81177  | -0.00039 |
| H | -4.75328 | -0.74133 | -0.00002 |
| H | -3.06947 | -2.57316 | 0.00064  |
| H | -0.65946 | -2.05797 | 0.00062  |
| H | -1.58946 | 2.14777  | -0.00072 |
| H | -3.97631 | 1.62512  | -0.00071 |
| C | 0.49891  | 0.39847  | 0.00005  |
| C | 1.61900  | -0.54964 | -0.00008 |
| O | 1.51822  | -1.75975 | -0.00026 |
| O | 2.80650  | 0.09814  | 0.00005  |
| C | 3.95559  | -0.75415 | -0.00019 |
| H | 3.96438  | -1.39164 | -0.88840 |
| H | 4.81555  | -0.08474 | -0.00147 |
| H | 3.96587  | -1.39006 | 0.88914  |
| N | 1.12029  | 2.76766  | 0.00040  |
| N | 0.84631  | 1.66531  | 0.00024  |

### DIPEA

Energy: -232781.4037305

|   |          |          |          |
|---|----------|----------|----------|
| N | 0.01171  | -0.01763 | -0.48071 |
| C | -0.51865 | 1.19313  | -1.07248 |
| H | -0.04176 | 1.33953  | -2.05390 |
| H | -1.57998 | 1.02569  | -1.28842 |
| C | -0.37261 | 2.49664  | -0.27305 |
| H | 0.68097  | 2.74535  | -0.10940 |

|   |          |          |          |
|---|----------|----------|----------|
| H | -0.82346 | 3.33128  | -0.82231 |
| H | -0.85742 | 2.43097  | 0.70444  |
| C | 1.43742  | -0.03608 | -0.17870 |
| H | 1.87866  | 0.75260  | -0.80334 |
| C | -0.87748 | -0.86459 | 0.30525  |
| H | -0.23398 | -1.60620 | 0.79378  |
| C | -1.83442 | -1.64539 | -0.60357 |
| H | -1.26956 | -2.19810 | -1.35896 |
| H | -2.43983 | -2.35226 | -0.02534 |
| H | -2.52599 | -0.97332 | -1.12405 |
| C | 1.79733  | 0.28164  | 1.28232  |
| H | 2.88398  | 0.32662  | 1.41507  |
| H | 1.37362  | 1.23853  | 1.59800  |
| H | 1.41834  | -0.49379 | 1.95741  |
| C | -1.65441 | -0.14333 | 1.41794  |
| H | -2.23424 | -0.85925 | 2.01099  |
| H | -0.9789  | 0.39067  | 2.09161  |
| H | -2.36158 | 0.58095  | 0.99883  |
| C | 2.07600  | -1.35929 | -0.61734 |
| H | 1.69536  | -2.20049 | -0.02708 |
| H | 1.85136  | -1.55728 | -1.66891 |
| H | 3.16329  | -1.33455 | -0.48562 |

### HBr

Energy: -1614136.8656230

|    |         |         |          |
|----|---------|---------|----------|
| Br | 0.00000 | 0.00000 | 0.03927  |
| H  | 0.00000 | 0.00000 | -1.37459 |

### N<sub>2</sub>

Energy: -68697.9195631

|   |         |         |          |
|---|---------|---------|----------|
| N | 0.00000 | 0.00000 | 0.55225  |
| N | 0.00000 | 0.00000 | -0.55225 |

### Int-0 (PdPPh<sub>3</sub>)

Energy: -730438.0818779

|    |          |          |          |
|----|----------|----------|----------|
| Pd | 0.00067  | 0.00408  | 2.59536  |
| P  | 0.00052  | 0.00105  | 0.40415  |
| C  | -1.27208 | 1.05970  | -0.40338 |
| C  | -1.94702 | 0.68257  | -1.57072 |
| C  | -1.53970 | 2.31182  | 0.16642  |
| C  | -2.87100 | 1.54689  | -2.15767 |
| H  | -1.75107 | -0.28574 | -2.02175 |

|   |          |          |          |
|---|----------|----------|----------|
| C | -2.45379 | 3.17710  | -0.42792 |
| H | -1.02908 | 2.59608  | 1.08385  |
| C | -3.12375 | 2.79486  | -1.59089 |
| H | -3.39333 | 1.24249  | -3.06070 |
| H | -2.65146 | 4.14610  | 0.02220  |
| H | -3.84489 | 3.46567  | -2.04979 |
| C | -0.28210 | -1.63190 | -0.39921 |
| C | 0.38440  | -2.03403 | -1.56297 |
| C | -1.2376  | -2.48451 | 0.17036  |
| C | 0.09542  | -3.26737 | -2.14672 |
| H | 1.12862  | -1.38426 | -2.01393 |
| C | -1.53237 | -3.70962 | -0.42092 |
| H | -1.74119 | -2.17964 | 1.0851   |
| C | -0.86393 | -4.1049  | -1.58044 |
| H | 0.62215  | -3.57236 | -3.04699 |
| H | -2.27661 | -4.36114 | 0.02883  |
| H | -1.08619 | -5.06554 | -2.03694 |
| C | 1.55471  | 0.57106  | -0.40301 |
| C | 1.5677   | 1.34116  | -1.57233 |
| C | 2.77187  | 0.17687  | 0.16914  |
| C | 2.77929  | 1.70656  | -2.15866 |
| H | 0.63205  | 1.65526  | -2.02547 |
| C | 3.97932  | 0.53325  | -0.42456 |
| H | 2.7611   | -0.40552 | 1.0878   |
| C | 3.98538  | 1.30176  | -1.58938 |
| H | 2.77851  | 2.30884  | -3.06321 |
| H | 4.91649  | 0.21996  | 0.02734  |
| H | 4.92771  | 1.5888   | -2.04793 |

### PPh<sub>3</sub>

Energy: -650126.6936949

|   |          |          |          |
|---|----------|----------|----------|
| P | -0.00047 | -0.00060 | -1.27816 |
| C | 0.22158  | 1.63165  | -0.45007 |
| C | 1.17108  | 2.50357  | -1.00200 |
| C | -0.48782 | 2.03795  | 0.68712  |
| C | 1.41847  | 3.74479  | -0.42196 |
| H | 1.72018  | 2.20505  | -1.89208 |
| C | -0.24855 | 3.28649  | 1.25936  |
| H | -1.22739 | 1.37500  | 1.12622  |
| C | 0.70613  | 4.14046  | 0.70989  |
| H | 2.16101  | 4.40706  | -0.85845 |
| H | -0.80792 | 3.59032  | 2.14010  |
| H | 0.89160  | 5.11234  | 1.15862  |
| C | -1.52527 | -0.62518 | -0.45052 |
| C | -1.52225 | -1.43874 | 0.68964  |
| C | -2.75527 | -0.24248 | -1.00461 |

|   |          |          |          |
|---|----------|----------|----------|
| C | -2.72288 | -1.85555 | 1.26244  |
| H | -0.57817 | -1.74499 | 1.13017  |
| C | -3.95379 | -0.64838 | -0.42381 |
| H | -2.7715  | 0.37948  | -1.89664 |
| C | -3.93996 | -1.4591  | 0.71086  |
| H | -2.70609 | -2.48872 | 2.14547  |
| H | -4.89879 | -0.33917 | -0.86185 |
| H | -4.87423 | -1.784   | 1.1602   |
| C | 1.30311  | -1.00813 | -0.45019 |
| C | 1.59073  | -2.26315 | -1.00556 |
| C | 2.00312  | -0.59878 | 0.6919   |
| C | 2.5425   | -3.09665 | -0.42413 |
| H | 1.06284  | -2.58823 | -1.89913 |
| C | 2.96523  | -1.42867 | 1.26548  |
| H | 1.79332  | 0.37084  | 1.13354  |
| C | 3.23467  | -2.67931 | 0.71241  |
| H | 2.75054  | -4.06843 | -0.86329 |
| H | 3.50276  | -1.09752 | 2.14997  |
| H | 3.98393  | -3.32481 | 1.16214  |

**(E)-5 (Prod-(E))**

Energy: -482137.1846484

|   |          |          |          |
|---|----------|----------|----------|
| C | 0.47347  | 3.79456  | 0.27443  |
| C | -0.11900 | 2.96295  | 1.22427  |
| C | 0.03732  | 1.58354  | 1.13684  |
| C | 0.78433  | 1.01372  | 0.09728  |
| C | 1.39183  | 1.85719  | -0.84089 |
| C | 1.23035  | 3.23764  | -0.75536 |
| H | 0.35159  | 4.87209  | 0.34062  |
| H | -0.70196 | 3.38910  | 2.03589  |
| H | -0.42924 | 0.93156  | 1.86930  |
| H | 1.99309  | 1.42478  | -1.63299 |
| H | 1.70165  | 3.88038  | -1.49360 |
| C | 0.91224  | -0.46165 | 0.01087  |
| C | 2.30780  | -0.98883 | -0.02295 |
| O | 3.29873  | -0.29544 | -0.13168 |
| O | 2.37283  | -2.33587 | 0.07090  |
| C | 3.69526  | -2.8748  | 0.02638  |
| H | 4.30078  | -2.48611 | 0.84997  |
| H | 3.57714  | -3.95496 | 0.11542  |
| H | 4.18716  | -2.61958 | -0.91654 |
| C | -0.12998 | -1.32554 | -0.0115  |
| H | 0.12133  | -2.38249 | 0.03574  |
| C | -1.56575 | -1.04625 | -0.098   |
| C | -2.4572  | -1.99987 | 0.42224  |
| C | -2.10095 | 0.09436  | -0.72274 |

|   |          |          |          |
|---|----------|----------|----------|
| C | -3.83327 | -1.80495 | 0.36218  |
| H | -2.05919 | -2.89831 | 0.8879   |
| C | -3.47596 | 0.27957  | -0.79622 |
| H | -1.4339  | 0.82868  | -1.15947 |
| C | -4.34792 | -0.66163 | -0.24641 |
| H | -4.50348 | -2.5492  | 0.78276  |
| H | -3.8708  | 1.16356  | -1.28884 |
| H | -5.42197 | -0.5089  | -0.30231 |

**(Z)-5 (Prod-(Z))**

Energy: -482134.4469470

|   |          |          |          |
|---|----------|----------|----------|
| C | -4.80480 | -0.81458 | 0.06663  |
| C | -4.29599 | 0.41075  | 0.49484  |
| C | -2.92797 | 0.65583  | 0.44816  |
| C | -2.03722 | -0.32202 | -0.02155 |
| C | -2.56534 | -1.54290 | -0.46941 |
| C | -3.93327 | -1.78875 | -0.41889 |
| H | -5.87381 | -1.00420 | 0.09859  |
| H | -4.96709 | 1.17957  | 0.86699  |
| H | -2.54434 | 1.61442  | 0.78530  |
| H | -1.89975 | -2.29177 | -0.88857 |
| H | -4.32187 | -2.73823 | -0.77628 |
| C | -0.58453 | -0.06771 | -0.02404 |
| C | -0.16694 | 1.35862  | -0.22076 |
| O | -0.49803 | 2.05204  | -1.15816 |
| O | 0.61288  | 1.78604  | 0.78827  |
| C | 1.1653   | 3.09326  | 0.61313  |
| H | 0.37938  | 3.82919  | 0.42458  |
| H | 1.69345  | 3.31788  | 1.53942  |
| H | 1.86279  | 3.09642  | -0.2303  |
| C | 0.3353   | -1.04666 | 0.12635  |
| H | -0.03558 | -2.04492 | 0.35517  |
| C | 1.79167  | -0.93289 | 0.01939  |
| C | 2.60207  | -1.778   | 0.79387  |
| C | 2.41698  | -0.03354 | -0.86117 |
| C | 3.98912  | -1.69558 | 0.72859  |
| H | 2.13329  | -2.49315 | 1.46538  |
| C | 3.80321  | 0.04541  | -0.92896 |
| H | 1.81089  | 0.58414  | -1.51763 |
| C | 4.59557  | -0.77923 | -0.12974 |
| H | 4.59819  | -2.35014 | 1.34563  |
| H | 4.26796  | 0.74256  | -1.62059 |
| H | 5.67857  | -0.71845 | -0.18715 |

## Shared Pathway

### Int-1

Energy: -2514015.9480380

|    |          |          |          |
|----|----------|----------|----------|
| P  | 1.34726  | -0.09580 | 0.04067  |
| C  | 1.79607  | 0.82128  | 1.57052  |
| C  | 2.04223  | 2.19902  | 1.59727  |
| C  | 1.91229  | 0.08279  | 2.75596  |
| C  | 2.40502  | 2.82406  | 2.79011  |
| H  | 1.94637  | 2.78359  | 0.68685  |
| C  | 2.28493  | 0.70698  | 3.94320  |
| H  | 1.70046  | -0.98430 | 2.74010  |
| C  | 2.53055  | 2.08048  | 3.96249  |
| H  | 2.58855  | 3.89510  | 2.80198  |
| H  | 2.37304  | 0.12402  | 4.85594  |
| H  | 2.81176  | 2.57047  | 4.89066  |
| C  | 0.84828  | 1.24628  | -1.11258 |
| C  | 1.75272  | 1.93284  | -1.93185 |
| C  | -0.50717 | 1.59985  | -1.13917 |
| C  | 1.30407  | 2.96082  | -2.76102 |
| H  | 2.80491  | 1.66247  | -1.92537 |
| C  | -0.95008 | 2.63366  | -1.9591  |
| H  | -1.21788 | 1.05886  | -0.51941 |
| C  | -0.04492 | 3.31463  | -2.77394 |
| H  | 2.01131  | 3.48532  | -3.39814 |
| H  | -2.00498 | 2.89352  | -1.95973 |
| H  | -0.39031 | 4.11594  | -3.42179 |
| C  | 2.98929  | -0.60614 | -0.6128  |
| C  | 4.19275  | -0.01394 | -0.21095 |
| C  | 3.01611  | -1.61851 | -1.58152 |
| C  | 5.40043  | -0.42495 | -0.77439 |
| H  | 4.18603  | 0.76682  | 0.54428  |
| C  | 4.22203  | -2.02049 | -2.14959 |
| H  | 2.08209  | -2.09085 | -1.8781  |
| C  | 5.41745  | -1.42498 | -1.74552 |
| H  | 6.32952  | 0.03789  | -0.45258 |
| H  | 4.23051  | -2.8057  | -2.90071 |
| H  | 6.35995  | -1.74419 | -2.18199 |
| Pd | -0.21638 | -1.7127  | 0.2566   |
| C  | -3.65518 | -1.17451 | -0.19592 |
| C  | -2.83579 | -1.68141 | -1.20131 |
| C  | -3.51064 | -1.65489 | 1.12119  |
| C  | -1.90918 | -2.71069 | -0.93163 |
| H  | -2.91783 | -1.29526 | -2.21373 |
| C  | -2.59356 | -2.65267 | 1.41245  |
| H  | -4.11943 | -1.22743 | 1.91327  |
| C  | -1.79998 | -3.22723 | 0.38561  |

|    |          |          |          |
|----|----------|----------|----------|
| H  | -1.40684 | -3.20459 | -1.75864 |
| H  | -2.50596 | -3.03281 | 2.42576  |
| H  | -1.24699 | -4.14506 | 0.57573  |
| C  | -4.65775 | -0.11934 | -0.5005  |
| H  | -5.59423 | -0.25622 | 0.04072  |
| H  | -4.85662 | -0.01985 | -1.56726 |
| Br | -4.03768 | 1.69131  | 0.07277  |

### TS1-2

Energy: -2514008.0634443

|    |          |          |          |
|----|----------|----------|----------|
| P  | 0.98627  | 0.14024  | -0.00693 |
| C  | 1.53364  | -0.59118 | 1.58704  |
| C  | 2.66101  | -0.15652 | 2.29228  |
| C  | 0.77397  | -1.65709 | 2.09251  |
| C  | 3.02576  | -0.78279 | 3.48458  |
| H  | 3.25178  | 0.67268  | 1.91412  |
| C  | 1.14802  | -2.28529 | 3.27643  |
| H  | -0.11340 | -1.98417 | 1.55419  |
| C  | 2.27410  | -1.84833 | 3.97627  |
| H  | 3.89908  | -0.43455 | 4.02951  |
| H  | 0.55333  | -3.11023 | 3.65937  |
| H  | 2.56024  | -2.33319 | 4.90565  |
| C  | 1.96288  | 1.68696  | -0.14627 |
| C  | 3.29257  | 1.71862  | -0.58621 |
| C  | 1.33042  | 2.88088  | 0.22380  |
| C  | 3.9827   | 2.92807  | -0.64102 |
| H  | 3.7837   | 0.79797  | -0.88995 |
| C  | 2.02589  | 4.08716  | 0.17435  |
| H  | 0.28798  | 2.85699  | 0.5353   |
| C  | 3.35189  | 4.11195  | -0.25743 |
| H  | 5.01297  | 2.94667  | -0.98621 |
| H  | 1.52801  | 5.00899  | 0.46194  |
| H  | 3.89138  | 5.05407  | -0.30372 |
| C  | 1.77865  | -0.96536 | -1.24499 |
| C  | 2.80093  | -1.86585 | -0.92505 |
| C  | 1.31184  | -0.90352 | -2.56541 |
| C  | 3.34628  | -2.68915 | -1.91072 |
| H  | 3.16581  | -1.92878 | 0.09621  |
| C  | 1.86329  | -1.71893 | -3.54926 |
| H  | 0.50531  | -0.2159  | -2.81025 |
| C  | 2.88083  | -2.61725 | -3.22233 |
| H  | 4.13613  | -3.3888  | -1.65065 |
| H  | 1.49451  | -1.66057 | -4.56982 |
| H  | 3.3053   | -3.26148 | -3.98741 |
| Pd | -1.24853 | 0.23001  | -0.17966 |
| C  | -3.18298 | -0.90215 | -0.4192  |

|    |          |          |          |
|----|----------|----------|----------|
| C  | -2.17797 | -1.48948 | -1.26689 |
| C  | -3.52689 | -1.58684 | 0.78469  |
| C  | -1.6633  | -2.77249 | -0.9521  |
| H  | -2.03126 | -1.10134 | -2.27389 |
| C  | -2.98561 | -2.82051 | 1.07534  |
| H  | -4.24022 | -1.12211 | 1.4601   |
| C  | -2.05778 | -3.42538 | 0.19753  |
| H  | -0.93698 | -3.21822 | -1.62478 |
| H  | -3.28189 | -3.33637 | 1.98421  |
| H  | -1.64912 | -4.40328 | 0.43516  |
| C  | -3.83557 | 0.34228  | -0.78327 |
| H  | -4.80943 | 0.51878  | -0.33948 |
| H  | -3.76593 | 0.64293  | -1.82465 |
| Br | -3.01133 | 2.29283  | 0.12644  |

### Int-2'

Energy: -2514041.9836632

|   |          |          |          |
|---|----------|----------|----------|
| P | 0.97196  | 0.10438  | 0.01823  |
| C | 1.89399  | -1.19601 | -0.88092 |
| C | 3.22928  | -1.47490 | -0.56038 |
| C | 1.27482  | -1.88440 | -1.92907 |
| C | 3.93716  | -2.42725 | -1.28731 |
| H | 3.71243  | -0.95452 | 0.26145  |
| C | 1.98926  | -2.83533 | -2.65625 |
| H | 0.22919  | -1.69447 | -2.15148 |
| C | 3.31812  | -3.10681 | -2.33778 |
| H | 4.97054  | -2.64318 | -1.03079 |
| H | 1.49921  | -3.37296 | -3.46277 |
| H | 3.87099  | -3.85351 | -2.90116 |
| C | 1.45282  | -0.10746 | 1.77478  |
| C | 2.61538  | 0.47553  | 2.30000  |
| C | 0.65608  | -0.91906 | 2.59364  |
| C | 2.97401  | 0.24951  | 3.62702  |
| H | 3.23662  | 1.11331  | 1.6779   |
| C | 1.02403  | -1.14222 | 3.91877  |
| H | -0.23844 | -1.38398 | 2.18645  |
| C | 2.17868  | -0.55879 | 4.43855  |
| H | 3.87506  | 0.7073   | 4.02595  |
| H | 0.40105  | -1.77395 | 4.54552  |
| H | 2.45858  | -0.73198 | 5.4741   |
| C | 1.8126   | 1.65325  | -0.48812 |
| C | 2.55358  | 1.72815  | -1.67211 |
| C | 1.63123  | 2.81351  | 0.27997  |
| C | 3.10611  | 2.94285  | -2.07871 |
| H | 2.70492  | 0.83699  | -2.27385 |
| C | 2.19175  | 4.02103  | -0.12397 |

|    |          |          |          |
|----|----------|----------|----------|
| H  | 1.05972  | 2.76342  | 1.2035   |
| C  | 2.9293   | 4.08923  | -1.30737 |
| H  | 3.68104  | 2.98852  | -2.99944 |
| H  | 2.05205  | 4.91029  | 0.48441  |
| H  | 3.3641   | 5.03288  | -1.62446 |
| Pd | -1.25406 | 0.08298  | -0.34968 |
| C  | -2.83134 | 1.6891   | -0.57502 |
| C  | -3.42079 | 0.62741  | -1.32305 |
| C  | -3.47946 | 2.09556  | 0.62627  |
| C  | -4.61188 | 0.01883  | -0.88504 |
| H  | -3.01282 | 0.3644   | -2.29702 |
| C  | -4.65301 | 1.49537  | 1.02814  |
| H  | -3.02831 | 2.88687  | 1.21834  |
| C  | -5.22185 | 0.44698  | 0.27731  |
| H  | -5.03505 | -0.79433 | -1.46529 |
| H  | -5.13893 | 1.82387  | 1.94278  |
| H  | -6.13758 | -0.02553 | 0.61951  |
| C  | -1.47586 | 2.07545  | -0.90653 |
| H  | -1.00464 | 2.83794  | -0.28995 |
| H  | -1.19655 | 2.14184  | -1.95888 |
| Br | -1.70456 | -2.31941 | 0.10029  |

### Int-2

Energy: -2514040.4888290

|   |          |          |          |
|---|----------|----------|----------|
| P | -0.73879 | 0.27028  | -0.00966 |
| C | -1.21295 | 0.14075  | 1.75628  |
| C | -2.31416 | 0.84205  | 2.26702  |
| C | -0.44905 | -0.66047 | 2.61170  |
| C | -2.64032 | 0.74830  | 3.61602  |
| H | -2.91685 | 1.46165  | 1.60974  |
| C | -0.78060 | -0.75293 | 3.96356  |
| H | 0.38674  | -1.22725 | 2.21219  |
| C | -1.87217 | -0.04946 | 4.46672  |
| H | -3.49552 | 1.29451  | 4.00429  |
| H | -0.18676 | -1.38350 | 4.61908  |
| H | -2.13031 | -0.12461 | 5.51956  |
| C | -2.28544 | -0.09044 | -0.93055 |
| C | -3.29211 | 0.87176  | -1.10316 |
| C | -2.47627 | -1.38191 | -1.43783 |
| C | -4.47007 | 0.54481  | -1.76936 |
| H | -3.14984 | 1.88391  | -0.73534 |
| C | -3.6596  | -1.70342 | -2.10114 |
| H | -1.70598 | -2.13533 | -1.29708 |
| C | -4.65638 | -0.74433 | -2.26911 |
| H | -5.24163 | 1.29867  | -1.90023 |
| H | -3.79744 | -2.70899 | -2.4884  |



|    |          |          |          |   |          |          |          |
|----|----------|----------|----------|---|----------|----------|----------|
| H  | -5.5757  | -0.9977  | -2.79009 | C | -4.74924 | -3.63326 | -0.63562 |
| C  | -0.51005 | 2.07094  | -0.26269 | H | -4.92053 | -1.55666 | -0.09959 |
| C  | -0.07737 | 2.89776  | 0.77961  | C | -2.5135  | -4.42482 | -1.09199 |
| C  | -0.61637 | 2.60456  | -1.5562  | H | -0.93397 | -2.97541 | -0.85275 |
| C  | 0.23278  | 4.23557  | 0.53532  | C | -3.88286 | -4.66519 | -1.00015 |
| H  | 0.01842  | 2.49569  | 1.78359  | H | -5.81818 | -3.81516 | -0.56719 |
| C  | -0.31332 | 3.94168  | -1.79565 | H | -1.83631 | -5.2261  | -1.37393 |
| H  | -0.94422 | 1.97094  | -2.37605 | H | -4.27738 | -5.65487 | -1.21393 |
| C  | 0.11606  | 4.76166  | -0.74948 | C | -3.3189  | 0.5162   | -1.26862 |
| H  | 0.56586  | 4.86688  | 1.35454  | C | -4.30241 | 1.41021  | -0.83618 |
| H  | -0.41052 | 4.34459  | -2.80003 | C | -3.12884 | 0.32049  | -2.64412 |
| H  | 0.35501  | 5.80468  | -0.93693 | C | -5.06792 | 2.11378  | -1.76578 |
| Pd | 1.17796  | -0.9606  | -0.55058 | H | -4.46286 | 1.57062  | 0.22461  |
| C  | 3.31721  | -0.39323 | -0.67579 | C | -3.89122 | 1.02577  | -3.56971 |
| C  | 2.63768  | 0.64681  | -1.3962  | H | -2.37809 | -0.38809 | -2.98657 |
| C  | 3.94393  | -0.0506  | 0.56378  | C | -4.85897 | 1.9318   | -3.13107 |
| C  | 2.67147  | 1.97852  | -0.91395 | H | -5.82518 | 2.81107  | -1.41818 |
| H  | 2.31334  | 0.46381  | -2.41948 | H | -3.72877 | 0.87174  | -4.63274 |
| C  | 3.94605  | 1.24876  | 1.00945  | H | -5.4499  | 2.48882  | -3.85276 |
| H  | 4.42307  | -0.83974 | 1.13571  | C | -0.49334 | 2.61698  | -0.81073 |
| C  | 3.30614  | 2.27216  | 0.27068  | C | -1.66514 | 3.30362  | -1.17115 |
| H  | 2.17923  | 2.76213  | -1.47957 | C | 0.21193  | 3.0892   | 0.3134   |
| H  | 4.4412   | 1.49484  | 1.94495  | C | -2.12776 | 4.38833  | -0.42758 |
| H  | 3.31477  | 3.29247  | 0.64106  | H | -2.22654 | 2.97185  | -2.03943 |
| C  | 3.06737  | -1.74282 | -1.08071 | C | -0.24192 | 4.17708  | 1.05174  |
| H  | 3.43573  | -2.55835 | -0.46504 | H | 1.10339  | 2.56532  | 0.64322  |
| H  | 2.95916  | -1.97671 | -2.1388  | C | -1.42311 | 4.82975  | 0.69161  |
| Br | 0.35381  | -3.22194 | -0.00903 | H | -3.04839 | 4.88394  | -0.7246  |

## Int-2'-L2

Energy: -3164199.0934825

|   |          |          |          |    |          |          |          |
|---|----------|----------|----------|----|----------|----------|----------|
| P | -2.22902 | -0.43250 | -0.13931 | H  | 0.32083  | 4.50403  | 1.92232  |
| C | -2.75115 | 0.04584  | 1.54229  | H  | -1.78696 | 5.67097  | 1.27514  |
| C | -3.22663 | -0.88415 | 2.47087  | C  | -0.04285 | 1.41711  | -1.57176 |
| C | -2.54168 | 1.37629  | 1.93464  | H  | 0.94326  | 1.56387  | -2.01465 |
| C | -3.51395 | -0.47975 | 3.77332  | H  | -0.73984 | 1.18177  | -2.37916 |
| H | -3.35058 | -1.92325 | 2.18507  | Br | 0.18705  | -1.9626  | 1.59356  |
| C | -2.83607 | 1.77367  | 3.23526  | Pd | 0.07905  | -0.18774 | -0.2426  |
| H | -2.14466 | 2.09945  | 1.22942  | P  | 2.41341  | -0.10293 | -0.19745 |
| C | -3.32359 | 0.84673  | 4.15717  | C  | 3.15659  | -1.77435 | -0.21354 |
| H | -3.87746 | -1.20858 | 4.49232  | C  | 3.07576  | 0.7468   | 1.28661  |
| H | -2.67294 | 2.80801  | 3.52447  | C  | 3.29422  | 0.74289  | -1.57088 |
| H | -3.54643 | 1.15570  | 5.17489  | C  | 4.34815  | -2.07387 | 0.4513   |
| C | -2.86531 | -2.12254 | -0.44245 | C  | 2.51702  | -2.76638 | -0.96788 |
| C | -4.24444 | -2.36481 | -0.36642 | C  | 4.37209  | 1.28343  | 1.30195  |
| C | -2.00231 | -3.15859 | -0.81129 | C  | 2.26637  | 0.87345  | 2.42402  |
|   |          |          |          | C  | 3.90655  | 0.02046  | -2.60169 |
|   |          |          |          | C  | 3.28416  | 2.1454   | -1.63725 |
|   |          |          |          | C  | 4.89618  | -3.35226 | 0.35793  |
|   |          |          |          | H  | 4.84115  | -1.31777 | 1.05443  |
|   |          |          |          | C  | 3.0748   | -4.03679 | -1.07128 |

|   |         |          |          |   |         |          |          |
|---|---------|----------|----------|---|---------|----------|----------|
| H | 1.5725  | -2.53927 | -1.45534 | H | 0.28547 | 6.33744  | -1.18015 |
| C | 4.85123 | 1.93156  | 2.43777  | C | 3.32743 | 0.90028  | -0.71094 |
| H | 5.00229 | 1.2051   | 0.42069  | C | 4.37097 | 0.68096  | 0.19315  |
| C | 2.75064 | 1.52669  | 3.55549  | C | 3.62536 | 1.19114  | -2.04941 |
| H | 1.26633 | 0.45023  | 2.42391  | C | 5.69586 | 0.74444  | -0.23941 |
| C | 4.50077 | 0.68693  | -3.67271 | H | 4.15011 | 0.44425  | 1.22899  |
| H | 3.92954 | -1.06422 | -2.56503 | C | 4.94729 | 1.25026  | -2.47806 |
| C | 3.88123 | 2.80681  | -2.70638 | H | 2.81586 | 1.3675   | -2.75405 |
| H | 2.81241 | 2.7244   | -0.8486  | C | 5.9861  | 1.02385  | -1.57305 |
| C | 4.26485 | -4.33231 | -0.40578 | H | 6.50075 | 0.56814  | 0.46874  |
| H | 5.8168  | -3.58228 | 0.88702  | H | 5.16767 | 1.46909  | -3.51895 |
| H | 2.57104 | -4.80144 | -1.65581 | H | 7.01839 | 1.06512  | -1.90887 |
| C | 4.04007 | 2.05613  | 3.56566  | C | 2.11302 | -2.62832 | -1.07498 |
| H | 5.85657 | 2.34358  | 2.43874  | C | 3.34462 | -2.4664  | -0.41495 |
| H | 2.1132  | 1.62047  | 4.43004  | C | 1.29483 | -3.70172 | -0.66629 |
| C | 4.49076 | 2.07906  | -3.72844 | C | 3.70625 | -3.28064 | 0.6553   |
| H | 4.97759 | 0.11272  | -4.46232 | H | 4.02278 | -1.68945 | -0.74956 |
| H | 3.86564 | 3.89246  | -2.74105 | C | 1.6589  | -4.51775 | 0.39973  |
| H | 4.69393 | -5.3281  | -0.47507 | H | 0.35675 | -3.86588 | -1.18943 |
| H | 4.41275 | 2.56738  | 4.44914  | C | 2.85723 | -4.30017 | 1.08434  |
| H | 4.95545 | 2.59567  | -4.56358 | H | 4.65883 | -3.11843 | 1.15359  |

## Int-2-L2

Energy: -3164200.1133611

|   |          |          |          |    |          |          |          |
|---|----------|----------|----------|----|----------|----------|----------|
| P | 1.56118  | 0.83943  | -0.22347 | H  | 1.0041   | -5.33393 | 0.69569  |
| C | 1.63698  | 0.51072  | 1.57957  | H  | 3.13466  | -4.93192 | 1.92376  |
| C | 1.89849  | 1.49156  | 2.54362  | C  | 1.67201  | -1.67531 | -2.12279 |
| C | 1.39552  | -0.80821 | 1.99043  | H  | 1.19386  | -2.15346 | -2.97668 |
| C | 1.90256  | 1.16024  | 3.89651  | H  | 2.47592  | -1.01725 | -2.45261 |
| H | 2.05172  | 2.52316  | 2.24800  | Br | -1.46267 | -2.13323 | -2.44139 |
| C | 1.38616  | -1.13296 | 3.34463  | Pd | 0.09252  | -0.61745 | -1.19325 |
| H | 1.19792  | -1.58117 | 1.25433  | P  | -1.84707 | 0.0168   | 0.14769  |
| C | 1.63588  | -0.14893 | 4.30021  | C  | -1.91681 | 1.55502  | 1.16083  |
| H | 2.09316  | 1.93165  | 4.63758  | C  | -2.12611 | -1.28807 | 1.41004  |
| H | 1.16863  | -2.15394 | 3.64201  | C  | -3.4008  | 0.17508  | -0.81156 |
| H | 1.61949  | -0.39889 | 5.35748  | C  | -2.56365 | 2.70181  | 0.68044  |
| C | 1.14078  | 2.60999  | -0.47620 | C  | -1.25255 | 1.62416  | 2.3929   |
| C | 2.01325  | 3.63063  | -0.06640 | C  | -2.90208 | -1.06069 | 2.55683  |
| C | -0.01657 | 2.95223  | -1.18002 | C  | -1.50684 | -2.5327  | 1.24688  |
| C | 1.69919  | 4.96434  | -0.30675 | C  | -3.31878 | 0.68977  | -2.11139 |
| H | 2.9571   | 3.3792   | 0.4095   | C  | -4.65435 | -0.11004 | -0.26374 |
| C | -0.32361 | 4.28765  | -1.4332  | C  | -2.52693 | 3.89166  | 1.40231  |
| H | -0.67354 | 2.16572  | -1.53763 | H  | -3.09891 | 2.6671   | -0.26331 |
| C | 0.52584  | 5.29574  | -0.98655 | C  | -1.21966 | 2.81505  | 3.11346  |
| H | 2.37935  | 5.7455   | 0.02105  | H  | -0.76886 | 0.74319  | 2.80096  |
| H | -1.23081 | 4.5349   | -1.97675 | C  | -3.04866 | -2.05741 | 3.51849  |
|   |          |          |          | H  | -3.37261 | -0.0943  | 2.71245  |
|   |          |          |          | C  | -1.6469  | -3.5242  | 2.21457  |
|   |          |          |          | H  | -0.90976 | -2.72355 | 0.36249  |
|   |          |          |          | C  | -4.477   | 0.94182  | -2.84157 |
|   |          |          |          | H  | -2.34443 | 0.85392  | -2.56257 |

|   |          |          |          |   |          |          |          |
|---|----------|----------|----------|---|----------|----------|----------|
| C | -5.81169 | 0.12725  | -1.00303 | H | -8.11454 | 1.60174  | -0.76776 |
| H | -4.73061 | -0.52969 | 0.73429  | P | 2.06577  | 0.02388  | -0.15441 |
| C | -1.84976 | 3.95518  | 2.61862  | C | 2.8049   | 0.55168  | 1.43216  |
| H | -3.02897 | 4.77149  | 1.00976  | C | 3.19292  | -1.29127 | -0.72656 |
| H | -0.6928  | 2.84452  | 4.06286  | C | 2.36454  | 1.41936  | -1.30248 |
| C | -2.41663 | -3.28988 | 3.35243  | C | 4.19221  | 0.54048  | 1.63281  |
| H | -3.65078 | -1.86668 | 4.40262  | C | 1.96082  | 0.99915  | 2.45446  |
| H | -1.14432 | -4.47685 | 2.07534  | C | 4.09724  | -1.10763 | -1.77842 |
| C | -5.72584 | 0.66091  | -2.28805 | C | 3.1524   | -2.51883 | -0.05049 |
| H | -4.40196 | 1.33485  | -3.8515  | C | 1.73442  | 1.36297  | -2.55514 |
| H | -6.78178 | -0.10727 | -0.57352 | C | 3.09515  | 2.55818  | -0.95239 |
| H | -1.81941 | 4.88496  | 3.17994  | C | 4.72539  | 0.98823  | 2.83883  |
| H | -2.52329 | -4.06245 | 4.10919  | H | 4.84856  | 0.17501  | 0.8475   |
| H | -6.62972 | 0.84555  | -2.86208 | C | 2.49908  | 1.44718  | 3.65903  |

### Int-5η3

Energy: -2826595.2712710

|    |          |          |          |
|----|----------|----------|----------|
| Pd | -0.22811 | -0.34007 | -0.00081 |
| C  | -2.34091 | -0.14809 | 0.20760  |
| C  | -2.75793 | -1.09868 | 1.28176  |
| O  | -2.44081 | -1.03259 | 2.45680  |
| O  | -3.49903 | -2.10403 | 0.78906  |
| C  | -1.77686 | 1.13910  | 0.60982  |
| C  | -1.80217 | 1.68608  | 1.92872  |
| C  | -0.96698 | 1.81370  | -0.36622 |
| C  | -1.10444 | 2.83554  | 2.22364  |
| H  | -2.38784 | 1.18188  | 2.68507  |
| C  | -0.24709 | 2.98433  | -0.02549 |
| H  | -1.06166 | 1.57758  | -1.42256 |
| C  | -0.30850 | 3.48477  | 1.25425  |
| H  | -1.16459 | 3.24804  | 3.22718  |
| H  | 0.34239  | 3.47644  | -0.79237 |
| H  | 0.24218  | 4.38249  | 1.51921  |
| H  | -2.5201  | 0.27065  | -1.90532 |
| H  | -3.03508 | -1.33387 | -1.42919 |
| C  | -4.47875 | 0.23325  | -1.04673 |
| C  | -3.05697 | -0.2846  | -1.13084 |
| C  | -4.72128 | 1.61063  | -0.98669 |
| C  | -5.56717 | -0.64222 | -1.00191 |
| C  | -6.02018 | 2.10285  | -0.88688 |
| H  | -3.88125 | 2.30124  | -1.01687 |
| C  | -6.869   | -0.15301 | -0.90397 |
| H  | -5.38392 | -1.71189 | -1.03216 |
| C  | -7.10001 | 1.22043  | -0.84527 |
| H  | -6.19045 | 3.17542  | -0.84391 |
| H  | -7.70469 | -0.84721 | -0.87215 |

|    |          |          |          |
|----|----------|----------|----------|
| H  | -8.11454 | 1.60174  | -0.76776 |
| P  | 2.06577  | 0.02388  | -0.15441 |
| C  | 2.8049   | 0.55168  | 1.43216  |
| C  | 3.19292  | -1.29127 | -0.72656 |
| C  | 2.36454  | 1.41936  | -1.30248 |
| C  | 4.19221  | 0.54048  | 1.63281  |
| C  | 1.96082  | 0.99915  | 2.45446  |
| C  | 4.09724  | -1.10763 | -1.77842 |
| C  | 3.1524   | -2.51883 | -0.05049 |
| C  | 1.73442  | 1.36297  | -2.55514 |
| C  | 3.09515  | 2.55818  | -0.95239 |
| C  | 4.72539  | 0.98823  | 2.83883  |
| H  | 4.84856  | 0.17501  | 0.8475   |
| C  | 2.49908  | 1.44718  | 3.65903  |
| H  | 0.88409  | 0.98727  | 2.30955  |
| C  | 4.95367  | -2.14337 | -2.15027 |
| H  | 4.13652  | -0.15858 | -2.30467 |
| C  | 4.01451  | -3.54527 | -0.4226  |
| H  | 2.43714  | -2.67081 | 0.75144  |
| C  | 1.83255  | 2.4319   | -3.44033 |
| H  | 1.15521  | 0.48214  | -2.82444 |
| C  | 3.18486  | 3.63181  | -1.83932 |
| H  | 3.57789  | 2.61613  | 0.01813  |
| C  | 3.8797   | 1.44417  | 3.85156  |
| H  | 5.801    | 0.97503  | 2.99135  |
| H  | 1.83613  | 1.78804  | 4.44916  |
| C  | 4.91397  | -3.36083 | -1.47331 |
| H  | 5.6531   | -1.9954  | -2.96844 |
| H  | 3.97407  | -4.4957  | 0.1015   |
| C  | 2.55283  | 3.57334  | -3.08    |
| H  | 1.34024  | 2.37955  | -4.40737 |
| H  | 3.74716  | 4.51725  | -1.55588 |
| H  | 4.29832  | 1.78753  | 4.79362  |
| H  | 5.58081  | -4.16725 | -1.76589 |
| H  | 2.61941  | 4.41327  | -3.76574 |
| Br | -0.29614 | -2.76434 | -0.34363 |
| C  | -3.73892 | -3.17786 | 1.69994  |
| H  | -4.26615 | -2.82403 | 2.58998  |
| H  | -4.3486  | -3.89646 | 1.15198  |
| H  | -2.78921 | -3.63065 | 1.99668  |

### Int-7

Energy: -2344423.6743579

|    |          |         |          |
|----|----------|---------|----------|
| Pd | -1.75359 | 0.00784 | -0.11296 |
| Br | -4.14431 | 0.01197 | -0.11743 |
| P  | 0.49613  | 0.00477 | -0.05989 |

|   |          |          |          |   |          |          |          |
|---|----------|----------|----------|---|----------|----------|----------|
| C | 1.31767  | 1.48371  | -0.74848 | H | -2.57556 | -3.95273 | 0.9473   |
| C | 0.59986  | 2.68575  | -0.79027 | H | -4.19787 | -3.25518 | 0.84315  |
| C | 2.64948  | 1.45541  | -1.18141 | C | -3.45995 | -0.69921 | -1.39502 |
| C | 1.21278  | 3.84926  | -1.25040 | H | -2.67994 | -1.35893 | -1.79928 |
| H | -0.43921 | 2.70260  | -0.47023 | C | -4.17471 | 0.05895  | 0.89101  |
| C | 3.25552  | 2.62045  | -1.64537 | H | -4.67201 | 0.77207  | 0.22377  |
| H | 3.20824  | 0.52422  | -1.16407 | C | -3.48665 | 0.88629  | 1.981    |
| C | 2.53958  | 3.81747  | -1.67786 | H | -2.77528 | 1.59119  | 1.54497  |
| H | 0.64972  | 4.77743  | -1.28295 | H | -4.22882 | 1.45203  | 2.55504  |
| H | 4.28676  | 2.59240  | -1.98568 | H | -2.95253 | 0.24516  | 2.693    |
| H | 3.01434  | 4.72372  | -2.04328 | C | -4.82342 | -1.2891  | -1.80178 |
| C | 1.06455  | -0.08486 | 1.67622  | H | -4.87921 | -1.38012 | -2.89241 |
| C | 1.88766  | 0.8863   | 2.25571  | H | -4.9982  | -2.27892 | -1.37369 |
| C | 0.61006  | -1.16308 | 2.45181  | H | -5.64471 | -0.63349 | -1.4921  |
| C | 2.25682  | 0.77446  | 3.59584  | C | -5.27007 | -0.82126 | 1.51914  |
| H | 2.24032  | 1.72466  | 1.66266  | H | -6.00314 | -0.18935 | 2.03271  |
| C | 0.98503  | -1.27069 | 3.78715  | H | -5.80486 | -1.41708 | 0.77548  |
| H | -0.03054 | -1.92042 | 2.00497  | H | -4.85208 | -1.50261 | 2.26871  |
| C | 1.80836  | -0.30052 | 4.36113  | C | -3.28016 | 0.6687   | -2.05981 |
| H | 2.89671  | 1.53092  | 4.04122  | H | -4.03764 | 1.38654  | -1.72751 |
| H | 0.63092  | -2.10829 | 4.38097  | H | -2.30272 | 1.09758  | -1.8282  |
| H | 2.09665  | -0.38206 | 5.40523  | H | -3.37992 | 0.57533  | -3.14716 |
| C | 1.30998  | -1.41841 | -0.86685 | P | 1.45302  | -0.23429 | 0.01681  |
| C | 2.49928  | -1.96378 | -0.36429 | C | 3.14015  | 0.34568  | -0.4214  |
| C | 0.74054  | -1.95323 | -2.02932 | C | 3.9108   | -0.23384 | -1.43564 |
| C | 3.11545  | -3.02331 | -1.02657 | C | 3.6471   | 1.451    | 0.28068  |
| H | 2.93622  | -1.56562 | 0.54734  | C | 5.17152  | 0.28112  | -1.73738 |
| C | 1.36303  | -3.00988 | -2.68941 | H | 3.5276   | -1.08442 | -1.99109 |
| H | -0.19574 | -1.55022 | -2.40566 | C | 4.90654  | 1.95944  | -0.02298 |
| C | 2.55005  | -3.5451  | -2.18982 | H | 3.05458  | 1.91336  | 1.06747  |
| H | 4.03553  | -3.44393 | -0.63077 | C | 5.67053  | 1.37552  | -1.03399 |
| H | 0.91359  | -3.42219 | -3.58807 | H | 5.76277  | -0.17534 | -2.52639 |
| H | 3.0297   | -4.37453 | -2.70177 | H | 5.2876   | 2.81624  | 0.52522  |
| H | -1.59313 | 0.30035  | -1.57232 | H | 6.65095  | 1.77648  | -1.27513 |

## TS7-8

Energy: -2577151.0017734

|    |          |          |          |   |          |          |          |
|----|----------|----------|----------|---|----------|----------|----------|
| Pd | 0.0893   | 1.56     | -0.028   | C | 1.11514  | -3.89454 | -1.88887 |
| Br | -1.13497 | 3.62839  | -0.07699 | H | 1.80865  | -3.22213 | 0.03245  |
| H  | -1.09115 | 0.61762  | 0.09162  | C | 0.27568  | -2.18742 | -3.37516 |
| N  | -3.19024 | -0.64168 | 0.05026  | H | 0.28652  | -0.17632 | -2.5987  |
| C  | -2.54109 | -1.81834 | 0.61837  | C | 0.56487  | -3.52725 | -3.11571 |
| H  | -1.52669 | -1.8755  | 0.20043  | H | 1.33333  | -4.93808 | -1.67955 |
| H  | -2.41046 | -1.63268 | 1.6902   | H | -0.16144 | -1.89645 | -4.32611 |
| C  | -3.18618 | -3.20083 | 0.43362  | H | 0.35447  | -4.28439 | -3.86595 |
| H  | -3.22878 | -3.4882  | -0.62134 | C | 1.68219  | -1.0384  | 1.64701  |

|   |          |          |         |
|---|----------|----------|---------|
| C | 2.85785  | -1.73209 | 1.96965 |
| C | 0.66219  | -0.93473 | 2.60101 |
| C | 2.99689  | -2.33181 | 3.21916 |
| H | 3.66977  | -1.7898  | 1.24958 |
| C | 0.80554  | -1.53666 | 3.84996 |
| H | -0.23248 | -0.36572 | 2.36391 |
| C | 1.96988  | -2.23773 | 4.1587  |
| H | 3.91147  | -2.86556 | 3.46223 |
| H | 0.01126  | -1.44642 | 4.5855  |
| H | 2.08346  | -2.70054 | 5.1351  |

### Int-8

Energy: -2577234.6449202

|    |          |          |          |
|----|----------|----------|----------|
| Pd | 0.20926  | -1.39583 | -0.01371 |
| Br | 2.35740  | -2.66333 | 0.04663  |
| H  | 3.07122  | -0.61281 | -0.06098 |
| N  | 3.25769  | 0.42961  | 0.00927  |
| C  | 2.52515  | 0.75004  | 1.29045  |
| H  | 1.63783  | 0.09417  | 1.24879  |
| H  | 3.15993  | 0.38550  | 2.10155  |
| C  | 2.07420  | 2.17896  | 1.51804  |
| H  | 1.35196  | 2.50026  | 0.76598  |
| H  | 1.54807  | 2.20049  | 2.47686  |
| H  | 2.88969  | 2.90325  | 1.57005  |
| C  | 2.58755  | 0.96987  | -1.24700 |
| H  | 1.52020  | 0.89584  | -1.00600 |
| C  | 4.76750  | 0.56222  | 0.05343  |
| H  | 5.07441  | 0.58170  | -0.99646 |
| C  | 5.37053  | -0.68074 | 0.70252  |
| H  | 5.05411  | -1.59415 | 0.19396  |
| H  | 6.46124  | -0.61078 | 0.66326  |
| H  | 5.07783  | -0.76805 | 1.75338  |
| C  | 2.95906  | 2.40498  | -1.59249 |
| H  | 2.35751  | 2.70277  | -2.4553  |
| H  | 2.74973  | 3.11571  | -0.79381 |
| H  | 4.01004  | 2.49227  | -1.88647 |
| C  | 5.25342  | 1.83664  | 0.73302  |
| H  | 6.34155  | 1.88467  | 0.63255  |
| H  | 4.83725  | 2.74228  | 0.29057  |
| H  | 5.02481  | 1.83139  | 1.80245  |
| C  | 2.86439  | 0.03572  | -2.42135 |
| H  | 3.91014  | 0.07655  | -2.74584 |
| H  | 2.60068  | -0.99636 | -2.17859 |
| H  | 2.24644  | 0.35352  | -3.26585 |
| P  | -1.58313 | -0.14578 | 0.0092   |
| C  | -2.79004 | -0.34128 | -1.37323 |

|   |          |          |          |
|---|----------|----------|----------|
| C | -3.59673 | 0.69765  | -1.85721 |
| C | -2.90695 | -1.61465 | -1.94575 |
| C | -4.50734 | 0.46387  | -2.88653 |
| H | -3.50641 | 1.69517  | -1.4354  |
| C | -3.82381 | -1.8491  | -2.9681  |
| H | -2.26096 | -2.41353 | -1.58815 |
| C | -4.62524 | -0.81013 | -3.44123 |
| H | -5.12502 | 1.27856  | -3.25557 |
| H | -3.90423 | -2.84165 | -3.40305 |
| H | -5.33434 | -0.99066 | -4.24468 |
| C | -1.26864 | 1.67561  | -0.04611 |
| C | -1.47717 | 2.51953  | 1.05087  |
| C | -0.71523 | 2.22023  | -1.21688 |
| C | -1.13052 | 3.87011  | 0.98392  |
| H | -1.91244 | 2.12     | 1.96196  |
| C | -0.38042 | 3.56927  | -1.2868  |
| H | -0.55943 | 1.57564  | -2.07954 |
| C | -0.57977 | 4.40006  | -0.18105 |
| H | -1.29594 | 4.50952  | 1.84709  |
| H | 0.0348   | 3.97597  | -2.20517 |
| H | -0.31346 | 5.45209  | -0.23246 |
| C | -2.66447 | -0.27788 | 1.50137  |
| C | -3.98854 | 0.17899  | 1.53333  |
| C | -2.10638 | -0.82674 | 2.66277  |
| C | -4.73526 | 0.09434  | 2.70618  |
| H | -4.44054 | 0.59507  | 0.63779  |
| C | -2.85229 | -0.90469 | 3.83833  |
| H | -1.08529 | -1.2017  | 2.62491  |
| C | -4.16773 | -0.4442  | 3.86182  |
| H | -5.76328 | 0.44691  | 2.71774  |
| H | -2.40838 | -1.33598 | 4.7316   |
| H | -4.75321 | -0.51146 | 4.77494  |

### Productive (Trans PPh<sub>3</sub>) (E)- Pathway

#### Int-3(E)

Energy: -2895258.4650738

|    |          |          |         |
|----|----------|----------|---------|
| Pd | 0.61387  | 0.73564  | 0.15924 |
| C  | 0.91880  | -2.86654 | 0.70220 |
| O  | 0.91886  | -2.60962 | 1.89578 |
| O  | -0.00746 | -3.64216 | 0.10816 |
| C  | -1.00949 | -4.18415 | 0.97159 |
| H  | -1.60367 | -3.38868 | 1.42501 |
| H  | -0.55038 | -4.79027 | 1.75767 |
| C  | 3.19586  | -1.74065 | 0.07633 |



|    |          |          |          |    |          |          |          |
|----|----------|----------|----------|----|----------|----------|----------|
| C  | 2.11936  | 4.62719  | -0.05795 | Pd | -0.53451 | -0.48262 | -0.66774 |
| H  | -0.00297 | 5.01955  | -0.03477 | C  | -2.47247 | -0.65575 | -0.72838 |
| H  | 4.16422  | 3.96239  | 0.10228  | C  | -3.01913 | -1.26552 | -1.96035 |
| H  | 2.37646  | 5.58467  | -0.50252 | O  | -2.98071 | -2.44104 | -2.24489 |
| P  | -1.70428 | 0.1247   | 0.11147  | O  | -3.51583 | -0.29915 | -2.76474 |
| C  | -2.64892 | 1.16198  | -1.05805 | C  | -3.92810 | -0.74880 | -4.06335 |
| C  | -2.46335 | -1.55059 | -0.0141  | H  | -4.72878 | -1.48853 | -3.98000 |
| C  | -2.27947 | 0.69278  | 1.7546   | H  | -3.08637 | -1.19832 | -4.59692 |
| C  | -4.01983 | 0.96869  | -1.26818 | C  | -3.35785 | -0.31053 | 0.34132  |
| C  | -1.98343 | 2.20327  | -1.71432 | C  | -2.83701 | 0.27468  | 1.52395  |
| C  | -3.50895 | -1.95145 | 0.83086  | C  | -4.75609 | -0.50429 | 0.23680  |
| C  | -1.98897 | -2.44721 | -0.98249 | C  | -3.68386 | 0.65216  | 2.55129  |
| C  | -1.87819 | -0.0375  | 2.8855   | H  | -1.76325 | 0.41291  | 1.60688  |
| C  | -3.03516 | 1.85689  | 1.92719  | C  | -5.59918 | -0.11596 | 1.26649  |
| C  | -4.7196  | 1.81711  | -2.12226 | H  | -5.16699 | -0.95848 | -0.65968 |
| H  | -4.53509 | 0.15241  | -0.76921 | C  | -5.06339 | 0.46018  | 2.42248  |
| C  | -2.69002 | 3.0538   | -2.56207 | H  | -3.27305 | 1.09433  | 3.45352  |
| H  | -0.91487 | 2.33323  | -1.57156 | H  | -6.67108 | -0.26497 | 1.17923  |
| C  | -4.05622 | -3.22892 | 0.71961  | H  | -5.72684 | 0.75915  | 3.22975  |
| H  | -3.89446 | -1.27031 | 1.5828   | C  | -0.53518 | 1.19804  | -1.95082 |
| C  | -2.54687 | -3.71813 | -1.09479 | H  | 0.35668  | 1.12509  | -2.57715 |
| H  | -1.18386 | -2.14838 | -1.64588 | H  | -1.42682 | 1.08179  | -2.57023 |
| C  | -2.24166 | 0.38242  | 4.16052  | C  | -0.55915 | 2.4559   | -1.16296 |
| H  | -1.27354 | -0.93336 | 2.76129  | C  | 0.54574  | 3.32443  | -1.13494 |
| C  | -3.38834 | 2.2806   | 3.20888  | C  | -1.68241 | 2.81194  | -0.39228 |
| H  | -3.35144 | 2.43088  | 1.06137  | C  | 0.55219  | 4.45976  | -0.32652 |
| C  | -4.05562 | 2.86197  | -2.76673 | H  | 1.41269  | 3.10105  | -1.74774 |
| H  | -5.78182 | 1.66046  | -2.28839 | C  | -1.67883 | 3.94462  | 0.4137   |
| H  | -2.16764 | 3.85699  | -3.07377 | H  | -2.55788 | 2.1719   | -0.41672 |
| C  | -3.57509 | -4.11665 | -0.24126 | C  | -0.55237 | 4.76964  | 0.46615  |
| H  | -4.86205 | -3.52662 | 1.38495  | H  | 1.4311   | 5.09899  | -0.31485 |
| H  | -2.16677 | -4.40053 | -1.84997 | H  | -2.55715 | 4.18144  | 1.009    |
| C  | -2.9963  | 1.54561  | 4.32512  | H  | -0.54312 | 5.64866  | 1.10469  |
| H  | -1.926   | -0.19227 | 5.02656  | P  | 1.70694  | -0.24435 | -0.00315 |
| H  | -3.97441 | 3.18716  | 3.33119  | C  | 1.48109  | 0.25012  | 1.74281  |
| H  | -4.60277 | 3.52091  | -3.43544 | C  | 2.80731  | -1.70228 | -0.01103 |
| H  | -4.00158 | -5.11252 | -0.32579 | C  | 2.80439  | 1.01832  | -0.74231 |
| H  | -3.27274 | 1.8783   | 5.3216   | C  | 1.74822  | -0.62575 | 2.79908  |
| Br | 0.34106  | -0.28749 | -2.71501 | C  | 0.84367  | 1.47465  | 2.0021   |
| H  | -0.39686 | -4.82078 | 0.74431  | C  | 4.08092  | -1.6253  | 0.57022  |
| C  | 2.2125   | -1.36221 | 0.08975  | C  | 2.40619  | -2.87863 | -0.65123 |
| N  | 2.39962  | -2.42512 | -1.38739 | C  | 3.0288   | 0.92763  | -2.12322 |
| N  | 2.19614  | -2.51278 | -2.48075 | C  | 3.4007   | 2.0539   | -0.0172  |
|    |          |          |          | C  | 1.40047  | -0.2719  | 4.10186  |
|    |          |          |          | H  | 2.20208  | -1.59131 | 2.60214  |
|    |          |          |          | C  | 0.50196  | 1.82212  | 3.30585  |
|    |          |          |          | H  | 0.60387  | 2.15139  | 1.18773  |
|    |          |          |          | C  | 4.93611  | -2.72184 | 0.52654  |

**Int-4(E)**

Energy: -2826551.9492598

|    |          |          |          |   |          |          |          |
|----|----------|----------|----------|---|----------|----------|----------|
| H  | 4.40034  | -0.70471 | 1.05211  | C | -4.04568 | 2.88251  | 1.16325  |
| C  | 3.27098  | -3.97135 | -0.70131 | H | -3.83393 | 1.03645  | 2.24103  |
| H  | 1.41404  | -2.94241 | -1.08636 | C | -2.128   | 3.58509  | -0.1109  |
| C  | 3.82092  | 1.87037  | -2.77131 | H | -0.44362 | 2.2652   | -0.08796 |
| H  | 2.57329  | 0.11847  | -2.68954 | C | -3.4392  | 3.80581  | 0.31208  |
| C  | 4.19243  | 2.99847  | -0.66932 | H | -5.07076 | 3.03392  | 1.49058  |
| H  | 3.23164  | 2.136    | 1.05161  | H | -1.64337 | 4.286    | -0.7855  |
| C  | 0.7792   | 0.94913  | 4.35896  | H | -3.98487 | 4.68276  | -0.02503 |
| H  | 1.60586  | -0.96093 | 4.91624  | P | 1.80616  | 0.24033  | 0.06196  |
| H  | 0.01204  | 2.7743   | 3.48923  | C | 3.21545  | -0.82832 | -0.39782 |
| C  | 4.53066  | -3.89626 | -0.11066 | C | 1.9768   | 1.73365  | -0.98794 |
| H  | 5.91988  | -2.65943 | 0.98342  | C | 2.26436  | 0.8191   | 1.74394  |
| H  | 2.95274  | -4.8844  | -1.19614 | C | 4.43449  | -0.29089 | -0.826   |
| C  | 4.39758  | 2.91437  | -2.04519 | C | 3.08139  | -2.21386 | -0.25046 |
| H  | 3.98233  | 1.79622  | -3.84298 | C | 2.73735  | 2.84715  | -0.60692 |
| H  | 4.6446   | 3.80544  | -0.09939 | C | 1.30356  | 1.74692  | -2.21882 |
| H  | 0.50668  | 1.21728  | 5.37619  | C | 1.60372  | 1.92378  | 2.30576  |
| H  | 5.19991  | -4.7516  | -0.147   | C | 3.19137  | 0.11617  | 2.5235   |
| H  | 5.00682  | 3.65752  | -2.55187 | C | 5.50988  | -1.13248 | -1.09987 |
| Br | -0.72991 | -2.52282 | 0.83585  | H | 4.5406   | 0.78268  | -0.95297 |
| H  | -4.28018 | 0.14175  | -4.58322 | C | 4.16264  | -3.05095 | -0.51643 |

#### TS4-5(E)

Energy: -2826549.3872390

|    |          |          |          |    |          |          |          |
|----|----------|----------|----------|----|----------|----------|----------|
| Pd | -0.33454 | -0.75580 | -0.09332 | H  | 3.2602   | 2.84872  | 0.34487  |
| C  | -2.14722 | -1.38772 | 0.16563  | C  | 1.3886   | 2.86259  | -3.04799 |
| C  | -2.25890 | -2.69834 | 0.85954  | H  | 0.72483  | 0.87807  | -2.52266 |
| O  | -2.81078 | -3.65341 | 0.34994  | C  | 1.87295  | 2.31798  | 3.61362  |
| O  | -1.62699 | -2.74633 | 2.04650  | H  | 0.88222  | 2.48576  | 1.71983  |
| C  | -3.34083 | -0.80146 | -0.37449 | C  | 3.45343  | 0.51122  | 3.83462  |
| C  | -3.22618 | 0.23373  | -1.33086 | H  | 3.71431  | -0.73783 | 2.10407  |
| C  | -4.62702 | -1.14822 | 0.09891  | C  | 5.37599  | -2.51206 | -0.9421  |
| C  | -4.35069 | 0.90447  | -1.78508 | H  | 6.45184  | -0.71081 | -1.4395  |
| H  | -2.23663 | 0.48088  | -1.70114 | H  | 4.05002  | -4.12579 | -0.40761 |
| C  | -5.74697 | -0.46418 | -0.34824 | C  | 2.1385   | 3.97274  | -2.65941 |
| H  | -4.73178 | -1.95499 | 0.81694  | H  | 3.40373  | 4.82203  | -1.13439 |
| C  | -5.60892 | 0.56454  | -1.28533 | H  | 0.86387  | 2.86331  | -3.99928 |
| H  | -4.24791 | 1.70347  | -2.51199 | C  | 2.79721  | 1.61137  | 4.38306  |
| H  | -6.73088 | -0.72786 | 0.02833  | H  | 1.35585  | 3.17751  | 4.03077  |
| H  | -6.48949 | 1.10049  | -1.62927 | H  | 4.17791  | -0.04218 | 4.42574  |
| H  | -1.94897 | -0.32654 | 2.26608  | H  | 6.21523  | -3.16715 | -1.15936 |
| H  | -0.38191 | 0.43763  | 2.10924  | H  | 2.1967   | 4.84447  | -3.30546 |
| C  | -2.02646 | 1.51459  | 1.17396  | H  | 3.00457  | 1.91792  | 5.40445  |
| C  | -1.33361 | 0.27792  | 1.59779  | Br | 0.21515  | -1.85177 | -2.23673 |
| C  | -3.34674 | 1.75708  | 1.58926  | C  | -1.61496 | -4.03798 | 2.66449  |
| C  | -1.43787 | 2.45126  | 0.3051   | H  | -1.07484 | -4.75358 | 2.03871  |
|    |          |          |          | H  | -1.10639 | -3.90107 | 3.61845  |
|    |          |          |          | H  | -2.6334  | -4.4054  | 2.81964  |



**TS4-5-(E)-(Z)**

Energy: -2826548.7694810

|    |          |          |          |
|----|----------|----------|----------|
| Pd | -0.34773 | -0.23709 | -0.13408 |
| C  | -2.20359 | -0.64046 | -0.58158 |
| C  | -2.38410 | -1.01044 | -2.01253 |
| O  | -2.78906 | -2.10938 | -2.33682 |
| O  | -1.96673 | -0.07849 | -2.88295 |
| C  | -2.02148 | -0.47586 | -4.25775 |
| H  | -3.03566 | -0.77392 | -4.53833 |
| H  | -1.34405 | -1.31491 | -4.43719 |
| C  | -3.31564 | -0.79202 | 0.30105  |
| C  | -3.08875 | -0.76756 | 1.69785  |
| C  | -4.64202 | -0.95074 | -0.16950 |
| C  | -4.14009 | -0.92071 | 2.58660  |
| H  | -2.06576 | -0.65877 | 2.04305  |
| C  | -5.69198 | -1.08100 | 0.72327  |
| H  | -4.82857 | -0.97385 | -1.23717 |
| C  | -5.44007 | -1.07285 | 2.09906  |
| H  | -3.95428 | -0.92025 | 3.65605  |
| H  | -6.7074  | -1.19649 | 0.35704  |
| H  | -6.26623 | -1.18736 | 2.79603  |
| C  | -0.74085 | 1.8055   | -0.49504 |
| H  | -0.03467 | 2.35208  | 0.13327  |
| H  | -0.49629 | 1.97006  | -1.5478  |
| C  | -2.13953 | 2.17967  | -0.1715  |
| C  | -2.53558 | 2.37094  | 1.16241  |
| C  | -3.12708 | 2.28505  | -1.16632 |
| C  | -3.86603 | 2.60013  | 1.49421  |
| H  | -1.78489 | 2.2947   | 1.94609  |
| C  | -4.45993 | 2.52063  | -0.83591 |
| H  | -2.83977 | 2.15198  | -2.20438 |
| C  | -4.84198 | 2.66561  | 0.49648  |
| H  | -4.14821 | 2.71851  | 2.53722  |
| H  | -5.20504 | 2.58859  | -1.62494 |
| H  | -5.88289 | 2.83451  | 0.75662  |
| P  | 1.97503  | 0.17983  | 0.09362  |
| C  | 2.70397  | -0.38913 | 1.67037  |
| C  | 2.97498  | -0.60281 | -1.23139 |
| C  | 2.495    | 1.93551  | 0.00375  |
| C  | 4.06498  | -0.68558 | 1.79975  |
| C  | 1.86999  | -0.46648 | 2.7919   |
| C  | 4.20597  | -0.06211 | -1.63301 |
| C  | 2.50773  | -1.77369 | -1.84306 |
| C  | 2.36795  | 2.61133  | -1.21947 |
| C  | 2.91533  | 2.64454  | 1.13383  |
| C  | 4.58572  | -1.04781 | 3.03993  |

|    |          |          |          |
|----|----------|----------|----------|
| H  | 4.71557  | -0.64438 | 0.93126  |
| C  | 2.3957   | -0.81907 | 4.03232  |
| H  | 0.8071   | -0.27307 | 2.67977  |
| C  | 4.95743  | -0.68532 | -2.6265  |
| H  | 4.57246  | 0.85279  | -1.1765  |
| C  | 3.26474  | -2.39175 | -2.83664 |
| H  | 1.56533  | -2.20923 | -1.52436 |
| C  | 2.6696   | 3.96597  | -1.31114 |
| H  | 2.03711  | 2.06873  | -2.10114 |
| C  | 3.21016  | 4.00485  | 1.03964  |
| H  | 3.01892  | 2.13344  | 2.08632  |
| C  | 3.75339  | -1.11079 | 4.1574   |
| H  | 5.64198  | -1.28478 | 3.13249  |
| H  | 1.74122  | -0.88323 | 4.89693  |
| C  | 4.48738  | -1.85092 | -3.23106 |
| H  | 5.90925  | -0.2575  | -2.9293  |
| H  | 2.89358  | -3.30075 | -3.30167 |
| C  | 3.09008  | 4.66723  | -0.17993 |
| H  | 2.57131  | 4.47674  | -2.26494 |
| H  | 3.5391   | 4.54471  | 1.9233   |
| H  | 4.16148  | -1.39636 | 5.12309  |
| H  | 5.0731   | -2.33495 | -4.00791 |
| H  | 3.32151  | 5.72631  | -0.25058 |
| Br | -0.004   | -2.62141 | 0.65517  |
| H  | -1.70716 | 0.39872  | -4.82671 |

**Int-5(E)**

Energy: -2826584.1822375

|    |         |          |          |
|----|---------|----------|----------|
| Pd | 0.27252 | -0.56755 | -0.31160 |
| C  | 2.32564 | -0.59303 | -0.83044 |
| C  | 2.30960 | -1.74100 | -1.78276 |
| O  | 1.77942 | -1.71505 | -2.88357 |
| O  | 2.90594 | -2.82405 | -1.26948 |
| C  | 3.37827 | -0.56636 | 0.23232  |
| C  | 3.25167 | -1.26580 | 1.43692  |
| C  | 4.55405 | 0.16095  | -0.00445 |
| C  | 4.26879 | -1.22169 | 2.38755  |
| H  | 2.35105 | -1.84264 | 1.61681  |
| C  | 5.56959 | 0.20370  | 0.94624  |
| H  | 4.66965 | 0.70256  | -0.93893 |
| C  | 5.42830 | -0.48505 | 2.15016  |
| H  | 4.15113 | -1.76825 | 3.31947  |
| H  | 6.47089 | 0.77635  | 0.74493  |
| H  | 6.21789 | -0.45001 | 2.89595  |
| H  | 1.87778 | 0.63843  | -2.52624 |
| H  | 0.62201 | 0.73932  | -1.37442 |

|    |          |          |          |
|----|----------|----------|----------|
| C  | 2.25065  | 2.01167  | -0.86783 |
| C  | 1.83833  | 0.68117  | -1.4324  |
| C  | 2.80606  | 2.97833  | -1.7078  |
| C  | 2.04151  | 2.31989  | 0.48207  |
| C  | 3.16208  | 4.23049  | -1.20603 |
| H  | 2.96285  | 2.74978  | -2.75922 |
| C  | 2.39331  | 3.56854  | 0.98272  |
| H  | 1.60448  | 1.56892  | 1.13692  |
| C  | 2.95586  | 4.5285   | 0.13906  |
| H  | 3.59623  | 4.97307  | -1.86968 |
| H  | 2.22667  | 3.79332  | 2.03224  |
| H  | 3.22865  | 5.50477  | 0.52965  |
| P  | -1.89674 | 0.18071  | 0.0414   |
| C  | -3.25124 | -0.9912  | -0.28646 |
| C  | -2.16249 | 0.76917  | 1.75362  |
| C  | -2.27383 | 1.65027  | -0.98743 |
| C  | -4.51379 | -0.83662 | 0.29942  |
| C  | -3.01848 | -2.04688 | -1.17568 |
| C  | -2.89711 | 1.92836  | 2.03472  |
| C  | -1.61778 | 0.01857  | 2.80541  |
| C  | -1.37221 | 2.72531  | -0.93905 |
| C  | -3.38545 | 1.72413  | -1.83183 |
| C  | -5.53868 | -1.72592 | -0.01374 |
| H  | -4.69008 | -0.02721 | 1.0027   |
| C  | -4.04894 | -2.93063 | -1.4882  |
| H  | -2.02786 | -2.18457 | -1.59977 |
| C  | -3.08689 | 2.33068  | 3.35561  |
| H  | -3.31396 | 2.51823  | 1.22342  |
| C  | -1.81483 | 0.42626  | 4.12235  |
| H  | -1.04794 | -0.88109 | 2.58637  |
| C  | -1.58127 | 3.85437  | -1.72324 |
| H  | -0.50402 | 2.68223  | -0.28533 |
| C  | -3.58784 | 2.85698  | -2.62183 |
| H  | -4.08967 | 0.89882  | -1.87604 |
| C  | -5.3072  | -2.77094 | -0.90912 |
| H  | -6.51626 | -1.60653 | 0.44494  |
| H  | -3.86307 | -3.7523  | -2.17368 |
| C  | -2.54615 | 1.58144  | 4.39985  |
| H  | -3.65625 | 3.23154  | 3.56738  |
| H  | -1.39017 | -0.15923 | 4.93291  |
| C  | -2.68982 | 3.92069  | -2.57017 |
| H  | -0.87285 | 4.67653  | -1.67722 |
| H  | -4.451   | 2.90405  | -3.27994 |
| H  | -6.10693 | -3.46655 | -1.14818 |
| H  | -2.6924  | 1.89901  | 5.42863  |
| H  | -2.85005 | 4.79893  | -3.18926 |
| Br | -0.02081 | -2.73605 | 0.79493  |
| C  | 2.7059   | -4.03285 | -2.00456 |

|   |         |          |          |
|---|---------|----------|----------|
| H | 3.05073 | -3.92558 | -3.03659 |
| H | 3.285   | -4.7933  | -1.48106 |
| H | 1.64439 | -4.29624 | -2.00209 |

### TS5-6(E)

Energy: -2826577.4393031

|    |          |          |          |
|----|----------|----------|----------|
| Pd | 0.30274  | -0.70508 | -0.58989 |
| C  | 2.49543  | -0.49358 | -0.92520 |
| C  | 2.78685  | -1.71945 | -1.72789 |
| O  | 3.52958  | -2.60696 | -1.37558 |
| O  | 2.10325  | -1.74643 | -2.90127 |
| C  | 3.35515  | -0.31000 | 0.28430  |
| C  | 3.27755  | -1.15740 | 1.39424  |
| C  | 4.31308  | 0.71386  | 0.28016  |
| C  | 4.11413  | -0.95848 | 2.48941  |
| H  | 2.54846  | -1.95970 | 1.39294  |
| C  | 5.15083  | 0.90907  | 1.37437  |
| H  | 4.39935  | 1.36337  | -0.58606 |
| C  | 5.04833  | 0.07670  | 2.48805  |
| H  | 4.03621  | -1.62208 | 3.34639  |
| H  | 5.88499  | 1.70983  | 1.35390  |
| H  | 5.6992   | 0.22844  | 3.34501  |
| H  | 1.77591  | 0.55437  | -2.63843 |
| H  | 0.16649  | 0.45612  | -1.60312 |
| C  | 1.79826  | 2.00905  | -1.02026 |
| C  | 1.8474   | 0.61534  | -1.55285 |
| C  | 1.88742  | 3.07387  | -1.92265 |
| C  | 1.54001  | 2.28745  | 0.33166  |
| C  | 1.72734  | 4.39014  | -1.48802 |
| H  | 2.06799  | 2.87037  | -2.97548 |
| C  | 1.36919  | 3.59687  | 0.7618   |
| H  | 1.43943  | 1.47107  | 1.03918  |
| C  | 1.46138  | 4.65467  | -0.14649 |
| H  | 1.79931  | 5.20527  | -2.20268 |
| H  | 1.14167  | 3.7853   | 1.80648  |
| H  | 1.31902  | 5.67765  | 0.19022  |
| P  | -1.77585 | 0.01315  | 0.05257  |
| C  | -3.09064 | -1.20124 | 0.37001  |
| C  | -1.4803  | 0.86772  | 1.64908  |
| C  | -2.55703 | 1.28934  | -1.00614 |
| C  | -4.09119 | -0.95201 | 1.31728  |
| C  | -3.11548 | -2.37977 | -0.38327 |
| C  | -1.97553 | 2.14855  | 1.91746  |
| C  | -0.67167 | 0.22328  | 2.59939  |
| C  | -1.79314 | 2.40952  | -1.3702  |
| C  | -3.87087 | 1.17419  | -1.46911 |

|    |          |          |          |   |          |          |          |
|----|----------|----------|----------|---|----------|----------|----------|
| C  | -5.11723 | -1.87552 | 1.50056  | H | -1.38542 | 1.77283  | 3.26293  |
| H  | -4.06237 | -0.0415  | 1.90981  | H | -1.70221 | -0.06586 | 4.91437  |
| C  | -4.14742 | -3.29681 | -0.1989  | H | -2.45481 | -0.19154 | -2.33925 |
| H  | -2.31297 | -2.58427 | -1.08547 | H | -1.16832 | 0.57704  | -1.40715 |
| C  | -1.65151 | 2.78625  | 3.11472  | C | -3.08287 | 1.41744  | -1.05621 |
| H  | -2.60065 | 2.65678  | 1.19022  | C | -2.26392 | 0.17721  | -1.32966 |
| C  | -0.35217 | 0.86732  | 3.79078  | C | -2.52287 | 2.68702  | -1.21879 |
| H  | -0.28517 | -0.77259 | 2.39494  | C | -4.41804 | 1.30325  | -0.66016 |
| C  | -2.33997 | 3.39814  | -2.1802  | C | -3.28512 | 3.8293   | -0.98611 |
| H  | -0.77532 | 2.52005  | -1.00568 | H | -1.47647 | 2.78323  | -1.49942 |
| C  | -4.41014 | 2.16314  | -2.29386 | C | -5.18134 | 2.44559  | -0.43224 |
| H  | -4.47274 | 0.31468  | -1.19043 | H | -4.84953 | 0.31654  | -0.51335 |
| C  | -5.14644 | -3.0458  | 0.74101  | C | -4.61744 | 3.7119   | -0.59306 |
| H  | -5.89085 | -1.68412 | 2.23882  | H | -2.82956 | 4.80873  | -1.10317 |
| H  | -4.16044 | -4.21568 | -0.77765 | H | -6.21722 | 2.34672  | -0.1198  |
| C  | -0.83404 | 2.15201  | 4.04828  | H | -5.21307 | 4.60109  | -0.40657 |
| H  | -2.03598 | 3.78302  | 3.31266  | P | 1.77805  | 0.38328  | -0.15005 |
| H  | 0.28432  | 0.36618  | 4.51424  | C | 2.32933  | 0.30689  | 1.59207  |
| C  | -3.64977 | 3.27443  | -2.64923 | C | 3.25126  | 0.02623  | -1.16175 |
| H  | -1.7372  | 4.2617   | -2.44632 | C | 1.39701  | 2.15835  | -0.41813 |
| H  | -5.42927 | 2.06098  | -2.65611 | C | 3.48871  | 0.97071  | 2.01608  |
| H  | -5.94485 | -3.76762 | 0.88959  | C | 1.54163  | -0.37961 | 2.52341  |
| H  | -0.57377 | 2.65551  | 4.97529  | C | 4.22446  | 0.99059  | -1.45867 |
| H  | -4.07397 | 4.0424   | -3.29001 | C | 3.4119   | -1.28981 | -1.61588 |
| Br | 0.2329   | -2.8784  | 0.61652  | C | 1.43243  | 2.70569  | -1.70896 |
| C  | 2.21857  | -2.97473 | -3.62363 | C | 0.88335  | 2.92551  | 0.63626  |
| H  | 1.82406  | -3.80025 | -3.02473 | C | 3.85027  | 0.95336  | 3.35923  |
| H  | 1.62625  | -2.84091 | -4.52921 | H | 4.10981  | 1.49633  | 1.29638  |
| H  | 3.26229  | -3.18392 | -3.87338 | C | 1.90647  | -0.38872 | 3.86913  |

### TS5(E)-5η<sup>3</sup>

Energy: -2826581.6967540

|    |          |          |          |   |         |          |          |
|----|----------|----------|----------|---|---------|----------|----------|
| Pd | -0.20967 | -0.71183 | -0.45643 | H | 0.65144 | -0.91034 | 2.19887  |
| C  | -2.30392 | -0.97497 | -0.36211 | C | 5.34952 | 0.63921  | -2.20051 |
| C  | -2.75828 | -2.28545 | -0.91395 | H | 4.09565 | 2.01689  | -1.1254  |
| O  | -3.32648 | -3.16846 | -0.30585 | C | 4.54404 | -1.63415 | -2.3518  |
| O  | -2.44679 | -2.39719 | -2.22518 | H | 2.65463 | -2.03514 | -1.38166 |
| C  | -2.30843 | -0.71592 | 1.09615  | C | 0.98515 | 4.00619  | -1.93331 |
| C  | -2.48623 | -1.74213 | 2.05169  | H | 1.81418 | 2.1147   | -2.53726 |
| C  | -1.91270 | 0.55863  | 1.57750  | C | 0.42565 | 4.22081  | 0.4045   |
| C  | -2.27137 | -1.50115 | 3.40131  | H | 0.8354  | 2.50186  | 1.63554  |
| H  | -2.76726 | -2.72943 | 1.71396  | C | 3.0567  | 0.27558  | 4.28783  |
| C  | -1.69476 | 0.78482  | 2.93406  | H | 4.75132 | 1.46683  | 3.683    |
| H  | -1.78981 | 1.39353  | 0.89889  | H | 1.28497 | -0.92053 | 4.58326  |
| C  | -1.87131 | -0.24143 | 3.85568  | C | 5.51086 | -0.6733  | -2.64561 |
| H  | -2.40926 | -2.31382 | 4.10921  | H | 6.09954 | 1.39048  | -2.432   |
|    |          |          |          | H | 4.66611 | -2.65593 | -2.69958 |
|    |          |          |          | C | 0.4806  | 4.76705  | -0.87758 |
|    |          |          |          | H | 1.02601 | 4.42335  | -2.93557 |
|    |          |          |          | H | 0.02454 | 4.8041   | 1.22837  |
|    |          |          |          | H | 3.341   | 0.26412  | 5.33659  |

|    |          |          |          |
|----|----------|----------|----------|
| H  | 6.38925  | -0.94484 | -3.22465 |
| H  | 0.12726  | 5.77871  | -1.05529 |
| Br | 0.43113  | -3.0447  | 0.02304  |
| C  | -2.661   | -3.69604 | -2.78149 |
| H  | -3.71139 | -3.98874 | -2.69904 |
| H  | -2.3642  | -3.61934 | -3.82761 |
| H  | -2.0402  | -4.42907 | -2.25962 |

### Int-6(E)

Energy: -2826579.1378332

|    |          |          |          |
|----|----------|----------|----------|
| Pd | 0.24815  | -0.63973 | -0.86847 |
| C  | 2.63136  | -0.27134 | -0.89205 |
| C  | 3.03670  | -1.55078 | -1.55908 |
| O  | 3.84004  | -2.32746 | -1.09765 |
| O  | 2.39183  | -1.75211 | -2.73244 |
| C  | 3.26134  | -0.02096 | 0.43591  |
| C  | 3.08509  | -0.89298 | 1.51580  |
| C  | 4.09180  | 1.09704  | 0.59542  |
| C  | 3.68632  | -0.62220 | 2.74187  |
| H  | 2.46514  | -1.77286 | 1.38355  |
| C  | 4.69658  | 1.36287  | 1.82033  |
| H  | 4.25586  | 1.76458  | -0.24526 |
| C  | 4.48640  | 0.50862  | 2.90241  |
| H  | 3.53442  | -1.30631 | 3.57260  |
| H  | 5.33425  | 2.23597  | 1.92743  |
| H  | 4.95535  | 0.7163   | 3.86055  |
| H  | 1.89128  | 0.53788  | -2.69469 |
| H  | -0.25577 | 0.47264  | -1.78631 |
| C  | 1.66753  | 2.1071   | -1.21058 |
| C  | 1.97864  | 0.7161   | -1.62438 |
| C  | 1.58453  | 3.08579  | -2.21013 |
| C  | 1.3465   | 2.47052  | 0.10943  |
| C  | 1.20297  | 4.39218  | -1.90574 |
| H  | 1.80729  | 2.81577  | -3.23965 |
| C  | 0.96039  | 3.77045  | 0.41026  |
| H  | 1.36302  | 1.72423  | 0.89531  |
| C  | 0.88731  | 4.73917  | -0.59383 |
| H  | 1.14558  | 5.13401  | -2.69748 |
| H  | 0.69326  | 4.01633  | 1.43326  |
| H  | 0.57826  | 5.75289  | -0.35501 |
| P  | -1.73415 | -0.078   | 0.03205  |
| C  | -2.89993 | -1.4136  | 0.43216  |
| C  | -1.26012 | 0.68881  | 1.63052  |
| C  | -2.74291 | 1.21037  | -0.79354 |
| C  | -3.72429 | -1.33514 | 1.56087  |
| C  | -2.98934 | -2.51281 | -0.42837 |

|    |          |          |          |
|----|----------|----------|----------|
| C  | -1.7527  | 1.93675  | 2.02803  |
| C  | -0.30327 | 0.03535  | 2.42404  |
| C  | -2.09445 | 2.35346  | -1.28487 |
| C  | -4.13305 | 1.10701  | -0.90202 |
| C  | -4.64442 | -2.34906 | 1.81742  |
| H  | -3.64186 | -0.48741 | 2.23569  |
| C  | -3.91516 | -3.51961 | -0.16923 |
| H  | -2.31358 | -2.58711 | -1.27504 |
| C  | -1.27975 | 2.53299  | 3.19684  |
| H  | -2.4885  | 2.45367  | 1.42059  |
| C  | 0.1728   | 0.64333  | 3.58092  |
| H  | 0.08332  | -0.93341 | 2.11849  |
| C  | -2.82971 | 3.37948  | -1.86717 |
| H  | -1.01563 | 2.45034  | -1.19962 |
| C  | -4.86402 | 2.13251  | -1.50402 |
| H  | -4.64603 | 0.22898  | -0.52211 |
| C  | -4.74157 | -3.43842 | 0.95142  |
| H  | -5.28092 | -2.29081 | 2.6958   |
| H  | -3.97743 | -4.37721 | -0.83254 |
| C  | -0.30855 | 1.8955   | 3.96667  |
| H  | -1.66447 | 3.50396  | 3.49662  |
| H  | 0.93901  | 0.14473  | 4.1664   |
| C  | -4.21697 | 3.26889  | -1.98333 |
| H  | -2.31256 | 4.2613   | -2.23403 |
| H  | -5.94248 | 2.03891  | -1.5955  |
| H  | -5.45563 | -4.23112 | 1.1569   |
| H  | 0.07446  | 2.37296  | 4.86432  |
| H  | -4.78999 | 4.06585  | -2.44907 |
| Br | 0.45061  | -2.91493 | 0.19604  |
| C  | 2.56528  | -3.06002 | -3.28659 |
| H  | 2.16161  | -3.80435 | -2.59448 |
| H  | 2.00374  | -3.05968 | -4.22094 |
| H  | 3.6224   | -3.26854 | -3.47036 |

### Productive (Trans PPh<sub>3</sub>) (Z)- Pathway

#### Int-3(Z)

Energy: -2895250.6696178

|    |          |          |          |
|----|----------|----------|----------|
| Pd | 0.05100  | -0.73640 | -1.03075 |
| C  | -2.38984 | -2.67235 | 1.04594  |
| O  | -2.17521 | -2.42541 | 2.22021  |
| O  | -2.11544 | -3.87169 | 0.48121  |
| C  | -1.52806 | -4.83212 | 1.36419  |
| H  | -2.18498 | -5.02798 | 2.21565  |
| H  | -0.56356 | -4.47325 | 1.73455  |

|   |          |          |          |                          |          |          |          |
|---|----------|----------|----------|--------------------------|----------|----------|----------|
| C | -3.36335 | -0.34708 | 0.37740  | H                        | 4.29543  | 4.38786  | -0.04515 |
| C | -3.36359 | 0.62385  | -0.63608 | H                        | 5.23351  | 0.55971  | -1.77258 |
| C | -3.77977 | 0.01163  | 1.66909  | C                        | -1.74173 | 4.83075  | -0.40282 |
| C | -3.78503 | 1.91959  | -0.36261 | H                        | -1.87046 | 4.94013  | 1.74528  |
| H | -2.99462 | 0.37657  | -1.62794 | H                        | -1.47662 | 4.43211  | -2.50756 |
| C | -4.17418 | 1.32008  | 1.93563  | C                        | 0.83959  | 0.19959  | 4.76945  |
| H | -3.77717 | -0.73011 | 2.45840  | H                        | -1.14312 | -0.61316 | 4.46721  |
| C | -4.18625 | 2.27729  | 0.92309  | H                        | 2.82071  | 1.04871  | 4.74532  |
| H | -3.75912 | 2.66255  | -1.15249 | H                        | 5.90412  | 2.888    | -1.20104 |
| H | -4.48354 | 1.58611  | 2.94284  | H                        | -2.28526 | 5.75783  | -0.56323 |
| H | -4.49009 | 3.29795  | 1.1348   | H                        | 0.8594   | -0.01363 | 5.83468  |
| C | 0.69498  | -2.12817 | 0.33022  | Br                       | -0.7847  | -0.22644 | -3.28369 |
| H | 0.33677  | -1.9675  | 1.34744  | H                        | -1.39462 | -5.73366 | 0.76673  |
| H | 0.12592  | -2.9335  | -0.16002 | C                        | -2.9428  | -1.72897 | 0.08264  |
| C | 2.1517   | -2.30889 | 0.22895  | N                        | -3.10922 | -2.18606 | -1.14348 |
| C | 3.00838  | -1.8814  | 1.25841  | N                        | -3.25773 | -2.5725  | -2.19778 |
| C | 2.72808  | -2.84217 | -0.94076 |                          |          |          |          |
| C | 4.38924  | -1.9374  | 1.10335  |                          |          |          |          |
| H | 2.57759  | -1.48636 | 2.17324  | <b>TS3-4(Z)</b>          |          |          |          |
| C | 4.10956  | -2.89682 | -1.09398 | Energy: -2895232.9555150 |          |          |          |
| H | 2.07707  | -3.1877  | -1.74077 |                          |          |          |          |
| C | 4.94663  | -2.43447 | -0.07595 | Pd                       | -0.51756 | -0.78174 | -0.40019 |
| H | 5.03517  | -1.58864 | 1.9045   | C                        | -2.91214 | -2.08016 | 0.93363  |
| H | 4.53524  | -3.29998 | -2.00875 | O                        | -2.84717 | -1.95365 | 2.14211  |
| H | 6.02556  | -2.47355 | -0.19636 | O                        | -3.19372 | -3.25251 | 0.33803  |
| P | 0.71595  | 0.97064  | 0.22099  | C                        | -3.42806 | -4.34447 | 1.23562  |
| C | 2.36686  | 1.59144  | -0.26994 | H                        | -4.28056 | -4.13272 | 1.88641  |
| C | -0.34069 | 2.44985  | 0.00958  | H                        | -2.54647 | -4.52809 | 1.85551  |
| C | 0.8059   | 0.72475  | 2.026    | C                        | -3.04969 | 0.37465  | 0.18995  |
| C | 2.7412   | 2.90672  | 0.04349  | C                        | -2.91547 | 1.33614  | -0.83128 |
| C | 3.27018  | 0.75427  | -0.93248 | C                        | -3.60113 | 0.77594  | 1.42069  |
| C | -0.80724 | 3.18688  | 1.10255  | C                        | -3.31630 | 2.64848  | -0.62572 |
| C | -0.5927  | 2.9005   | -1.29373 | H                        | -2.47308 | 1.05130  | -1.78075 |
| C | -0.30179 | 0.13074  | 2.64518  | C                        | -3.96896 | 2.10301  | 1.62645  |
| C | 1.93102  | 1.05794  | 2.78816  | H                        | -3.70563 | 0.05564  | 2.22177  |
| C | 4.01204  | 3.36771  | -0.2886  | C                        | -3.83211 | 3.04359  | 0.60801  |
| H | 2.03652  | 3.56776  | 0.5405   | H                        | -3.18593 | 3.37307  | -1.42232 |
| C | 4.5405   | 1.22162  | -1.26216 | H                        | -4.373   | 2.39776  | 2.59121  |
| H | 2.9841   | -0.25817 | -1.1939  | H                        | -4.1182  | 4.07821  | 0.7742   |
| C | -1.50755 | 4.37442  | 0.89187  | C                        | -0.01105 | -2.13523 | 1.10795  |
| H | -0.62546 | 2.83991  | 2.11436  | H                        | -0.07421 | -1.71134 | 2.10915  |
| C | -1.28566 | 4.08919  | -1.49469 | H                        | -0.7471  | -2.93071 | 0.98383  |
| H | -0.26263 | 2.31096  | -2.14457 | C                        | 1.33481  | -2.59404 | 0.71372  |
| C | -0.28441 | -0.1309  | 4.01085  | C                        | 2.47883  | -2.25903 | 1.45928  |
| H | -1.17043 | -0.15029 | 2.05898  | C                        | 1.50423  | -3.37249 | -0.44921 |
| C | 1.94276  | 0.79471  | 4.15783  | C                        | 3.74411  | -2.66013 | 1.0431   |
| H | 2.79949  | 1.50373  | 2.31392  | H                        | 2.3643   | -1.68007 | 2.37002  |
| C | 4.91403  | 2.5246   | -0.93972 | C                        | 2.77043  | -3.77324 | -0.86328 |

|    |          |          |          |
|----|----------|----------|----------|
| H  | 0.62947  | -3.63713 | -1.03852 |
| C  | 3.89759  | -3.41288 | -0.12186 |
| H  | 4.61571  | -2.38321 | 1.62991  |
| H  | 2.87895  | -4.36397 | -1.7687  |
| H  | 4.88729  | -3.72088 | -0.447   |
| P  | 1.03549  | 0.81966  | 0.21954  |
| C  | 2.66823  | 0.90364  | -0.58607 |
| C  | 0.31964  | 2.47131  | -0.15208 |
| C  | 1.34276  | 0.87315  | 2.02074  |
| C  | 3.45601  | 2.06262  | -0.52114 |
| C  | 3.12704  | -0.21136 | -1.2916  |
| C  | -0.10154 | 3.35944  | 0.84272  |
| C  | 0.20363  | 2.84234  | -1.50019 |
| C  | 0.23272  | 0.7211   | 2.86701  |
| C  | 2.61836  | 1.00679  | 2.5783   |
| C  | 4.70227  | 2.0914   | -1.13955 |
| H  | 3.08657  | 2.93929  | 0.00464  |
| C  | 4.37602  | -0.17711 | -1.90882 |
| H  | 2.50438  | -1.09651 | -1.36484 |
| C  | -0.62568 | 4.6038   | 0.494    |
| H  | -0.0183  | 3.09087  | 1.89027  |
| C  | -0.31134 | 4.08836  | -1.84059 |
| H  | 0.50241  | 2.14639  | -2.27834 |
| C  | 0.39954  | 0.71538  | 4.2487   |
| H  | -0.75901 | 0.59167  | 2.43769  |
| C  | 2.78156  | 0.98744  | 3.96327  |
| H  | 3.48519  | 1.10425  | 1.93246  |
| C  | 5.16389  | 0.9692   | -1.83152 |
| H  | 5.31057  | 2.99025  | -1.08889 |
| H  | 4.72594  | -1.04977 | -2.45204 |
| C  | -0.72739 | 4.97381  | -0.8446  |
| H  | -0.95137 | 5.28443  | 1.27562  |
| H  | -0.393   | 4.3648   | -2.8881  |
| C  | 1.67574  | 0.84344  | 4.79953  |
| H  | -0.46626 | 0.59499  | 4.89351  |
| H  | 3.77728  | 1.08115  | 4.38785  |
| H  | 6.13558  | 0.99533  | -2.31739 |
| H  | -1.13254 | 5.94579  | -1.11282 |
| H  | 1.80736  | 0.82457  | 5.87778  |
| Br | -0.44458 | -0.40671 | -2.88989 |
| H  | -3.63531 | -5.20401 | 0.59904  |
| C  | -2.52231 | -1.00461 | -0.02383 |
| N  | -3.35614 | -1.5264  | -1.51893 |
| N  | -3.29158 | -1.55126 | -2.63375 |

### Int-4(Z)

Energy: -2826549.6160917

|    |          |          |          |
|----|----------|----------|----------|
| Pd | 0.66076  | -0.32689 | -0.12360 |
| C  | 2.59360  | -0.23445 | 0.03127  |
| C  | 3.04234  | 0.95973  | 0.78816  |
| O  | 2.85316  | 1.11593  | 1.97497  |
| O  | 3.63088  | 1.85053  | -0.02441 |
| C  | 3.88240  | 3.13773  | 0.56595  |
| H  | 4.61504  | 3.04887  | 1.37250  |
| H  | 2.95290  | 3.55868  | 0.95456  |
| C  | 3.57167  | -1.19165 | -0.38540 |
| C  | 3.16566  | -2.33622 | -1.11381 |
| C  | 4.94672  | -1.02572 | -0.08927 |
| C  | 4.09778  | -3.26979 | -1.53447 |
| H  | 2.10705  | -2.46231 | -1.31584 |
| C  | 5.87502  | -1.96482 | -0.50977 |
| H  | 5.27168  | -0.15338 | 0.46865  |
| C  | 5.45037  | -3.08462 | -1.23143 |
| H  | 3.77922  | -4.14658 | -2.08956 |
| H  | 6.92755  | -1.83376 | -0.2781  |
| H  | 6.18029  | -3.82057 | -1.55818 |
| C  | 0.73067  | 1.26399  | -1.49162 |
| H  | 1.59265  | 1.12885  | -2.15273 |
| H  | -0.16665 | 1.1585   | -2.10933 |
| C  | 0.77417  | 2.63238  | -0.87472 |
| C  | 1.31881  | 3.70337  | -1.60288 |
| C  | 0.25919  | 2.91477  | 0.39957  |
| C  | 1.32168  | 5.0004   | -1.09609 |
| H  | 1.74128  | 3.50913  | -2.58604 |
| C  | 0.2577   | 4.21251  | 0.91222  |
| H  | -0.12974 | 2.10344  | 1.00691  |
| C  | 0.78573  | 5.26439  | 0.16574  |
| H  | 1.7465   | 5.8084   | -1.68671 |
| H  | -0.14941 | 4.39276  | 1.90356  |
| H  | 0.78959  | 6.27517  | 0.56428  |
| P  | -1.72238 | -0.34282 | -0.10129 |
| C  | -2.4686  | -2.00964 | -0.1861  |
| C  | -2.38387 | 0.42222  | 1.42792  |
| C  | -2.59496 | 0.55725  | -1.44258 |
| C  | -3.7149  | -2.29638 | 0.37938  |
| C  | -1.78868 | -3.00277 | -0.90105 |
| C  | -3.64199 | 1.04039  | 1.46124  |
| C  | -1.60345 | 0.38681  | 2.59224  |
| C  | -2.5583  | 1.96004  | -1.46557 |
| C  | -3.22109 | -0.12462 | -2.49275 |
| C  | -4.27655 | -3.56215 | 0.22551  |

|    |          |          |          |
|----|----------|----------|----------|
| H  | -4.24185 | -1.53621 | 0.9483   |
| C  | -2.35846 | -4.26264 | -1.06385 |
| H  | -0.80469 | -2.78792 | -1.30737 |
| C  | -4.11055 | 1.61558  | 2.64035  |
| H  | -4.25005 | 1.08364  | 0.56239  |
| C  | -2.07757 | 0.96599  | 3.76736  |
| H  | -0.63239 | -0.10038 | 2.57922  |
| C  | -3.14221 | 2.66291  | -2.51499 |
| H  | -2.06807 | 2.50407  | -0.66392 |
| C  | -3.80233 | 0.58421  | -3.54367 |
| H  | -3.26262 | -1.20953 | -2.48754 |
| C  | -3.60217 | -4.54418 | -0.49928 |
| H  | -5.24102 | -3.78165 | 0.67497  |
| H  | -1.82274 | -5.02974 | -1.61575 |
| C  | -3.32804 | 1.58186  | 3.79424  |
| H  | -5.08595 | 2.09411  | 2.65489  |
| H  | -1.46212 | 0.93604  | 4.6619   |
| C  | -3.76536 | 1.97702  | -3.5579  |
| H  | -3.10312 | 3.7485   | -2.51828 |
| H  | -4.28906 | 0.04286  | -4.3503  |
| H  | -4.0416  | -5.531   | -0.61635 |
| H  | -3.69222 | 2.03657  | 4.71151  |
| H  | -4.21937 | 2.52657  | -4.37786 |
| Br | 0.6987   | -2.29933 | 1.462    |
| H  | 4.26619  | 3.75715  | -0.24279 |

### TS4-5(Z)

Energy: -2826545.2132343

|    |          |          |          |
|----|----------|----------|----------|
| Pd | -0.53157 | -0.54683 | -0.19498 |
| C  | -2.46536 | -0.54356 | -0.18911 |
| C  | -3.10975 | 0.49591  | -1.05095 |
| O  | -2.86497 | 0.63270  | -2.22805 |
| O  | -3.94645 | 1.28961  | -0.35542 |
| C  | -4.37689 | 2.46977  | -1.05130 |
| H  | -4.93417 | 2.20393  | -1.95290 |
| H  | -3.50823 | 3.07639  | -1.32037 |
| C  | -3.29778 | -1.56275 | 0.41838  |
| C  | -2.68155 | -2.62356 | 1.12028  |
| C  | -4.70484 | -1.56685 | 0.29356  |
| C  | -3.43919 | -3.64049 | 1.67871  |
| H  | -1.59730 | -2.62984 | 1.18861  |
| C  | -5.45956 | -2.59168 | 0.84918  |
| H  | -5.19956 | -0.75878 | -0.23341 |
| C  | -4.83048 | -3.62634 | 1.5437   |
| H  | -2.95101 | -4.45191 | 2.21002  |

|   |          |          |          |
|---|----------|----------|----------|
| H | -6.54029 | -2.58629 | 0.74256  |
| H | -5.42464 | -4.4262  | 1.97726  |
| C | -1.42958 | 0.87082  | 1.24571  |
| H | -2.3428  | 0.62025  | 1.79142  |
| H | -0.59686 | 0.66009  | 1.9266   |
| C | -1.46375 | 2.28617  | 0.77235  |
| C | -2.2062  | 3.23764  | 1.49055  |
| C | -0.77719 | 2.71918  | -0.37128 |
| C | -2.23287 | 4.57358  | 1.10105  |
| H | -2.7655  | 2.91941  | 2.36691  |
| C | -0.7999  | 4.05694  | -0.76424 |
| H | -0.23512 | 1.99262  | -0.9694  |
| C | -1.5255  | 4.99175  | -0.02808 |
| H | -2.81028 | 5.29135  | 1.67806  |
| H | -0.25354 | 4.35919  | -1.65327 |
| H | -1.54881 | 6.03389  | -0.33429 |
| P | 1.77093  | -0.13299 | 0.14766  |
| C | 2.89482  | -1.57269 | 0.12347  |
| C | 2.4314   | 1.01323  | -1.11929 |
| C | 2.1676   | 0.67073  | 1.74971  |
| C | 4.25031  | -1.44233 | -0.199   |
| C | 2.38968  | -2.82149 | 0.50309  |
| C | 3.40231  | 1.98247  | -0.83701 |
| C | 1.92063  | 0.90381  | -2.42148 |
| C | 1.73388  | 1.98503  | 1.98354  |
| C | 2.79784  | -0.03153 | 2.78459  |
| C | 5.09204  | -2.55019 | -0.13643 |
| H | 4.64486  | -0.47779 | -0.50571 |
| C | 3.23689  | -3.92505 | 0.57387  |
| H | 1.33042  | -2.9267  | 0.71624  |
| C | 3.85068  | 2.83735  | -1.84233 |
| H | 3.79923  | 2.07747  | 0.16946  |
| C | 2.37512  | 1.76038  | -3.42135 |
| H | 1.17165  | 0.14754  | -2.6456  |
| C | 1.93139  | 2.58282  | 3.22499  |
| H | 1.24262  | 2.54351  | 1.19262  |
| C | 2.98967  | 0.57024  | 4.02776  |
| H | 3.14431  | -1.04704 | 2.61805  |
| C | 4.58709  | -3.79093 | 0.25331  |
| H | 6.14215  | -2.44516 | -0.39463 |
| H | 2.83728  | -4.89311 | 0.86217  |
| C | 3.33599  | 2.72991  | -3.13383 |
| H | 4.60108  | 3.5894   | -1.61423 |
| H | 1.97118  | 1.67078  | -4.42574 |
| C | 2.55796  | 1.87631  | 4.2519   |
| H | 1.58961  | 3.60108  | 3.38792  |
| H | 3.48288  | 0.0152   | 4.82107  |

|    |          |          |          |
|----|----------|----------|----------|
| H  | 5.24488  | -4.65462 | 0.29868  |
| H  | 3.68304  | 3.40116  | -3.91469 |
| H  | 2.70942  | 2.3423   | 5.22162  |
| Br | -0.1248  | -2.29812 | -1.88518 |
| H  | -5.00812 | 3.00894  | -0.34618 |

**TS4(E)-(Z)**

Energy: -2826545.4748367

|    |          |          |          |
|----|----------|----------|----------|
| Pd | -0.35844 | -0.44660 | 0.30047  |
| C  | -2.20050 | -0.89042 | -0.10766 |
| C  | -2.37690 | -1.31870 | -1.53305 |
| O  | -3.02456 | -2.29856 | -1.84162 |
| O  | -1.66805 | -0.58306 | -2.39936 |
| C  | -1.65201 | -1.07568 | -3.74257 |
| H  | -2.66197 | -1.10040 | -4.16141 |
| H  | -1.23100 | -2.08458 | -3.76547 |
| C  | -3.35616 | -0.91240 | 0.73410  |
| C  | -3.17715 | -0.92275 | 2.13748  |
| C  | -4.67024 | -0.84249 | 0.21412  |
| C  | -4.26860 | -0.87529 | 2.98780  |
| H  | -2.16326 | -0.98311 | 2.52100  |
| C  | -5.75711 | -0.75985 | 1.07076  |
| H  | -4.81911 | -0.82901 | -0.85888 |
| C  | -5.55821 | -0.78143 | 2.45309  |
| H  | -4.12509 | -0.90032 | 4.06368  |
| H  | -6.76158 | -0.67971 | 0.66695  |
| H  | -6.41414 | -0.72444 | 3.1204   |
| C  | -1.04075 | 1.44586  | 0.93344  |
| H  | -1.20845 | 1.29565  | 2.00679  |
| H  | -0.20972 | 2.14185  | 0.81777  |
| C  | -2.26001 | 1.98679  | 0.26625  |
| C  | -3.43107 | 2.25799  | 0.9881   |
| C  | -2.28017 | 2.2133   | -1.12028 |
| C  | -4.58628 | 2.7056   | 0.34962  |
| H  | -3.44295 | 2.08198  | 2.06067  |
| C  | -3.42874 | 2.6694   | -1.75995 |
| H  | -1.39116 | 1.97653  | -1.69818 |
| C  | -4.59338 | 2.91258  | -1.0292  |
| H  | -5.4864  | 2.88388  | 0.93239  |
| H  | -3.41916 | 2.82575  | -2.83588 |
| H  | -5.4943  | 3.25729  | -1.52927 |
| P  | 1.9099   | 0.26224  | 0.18236  |
| C  | 3.11555  | -0.77737 | 1.07997  |
| C  | 2.45871  | 0.28344  | -1.57078 |
| C  | 2.32502  | 1.95641  | 0.74981  |

|    |          |          |          |
|----|----------|----------|----------|
| C  | 4.4535   | -0.88333 | 0.68639  |
| C  | 2.67982  | -1.43532 | 2.23627  |
| C  | 3.50375  | 1.11525  | -2.00039 |
| C  | 1.82512  | -0.5532  | -2.49962 |
| C  | 1.85926  | 3.0554   | 0.01044  |
| C  | 3.01149  | 2.18418  | 1.94732  |
| C  | 5.34724  | -1.63313 | 1.44764  |
| H  | 4.79562  | -0.39147 | -0.21912 |
| C  | 3.57863  | -2.17498 | 3.00068  |
| H  | 1.63174  | -1.38621 | 2.51717  |
| C  | 3.9093   | 1.10691  | -3.3331  |
| H  | 3.99333  | 1.78072  | -1.29515 |
| C  | 2.23568  | -0.55696 | -3.83114 |
| H  | 1.02473  | -1.20936 | -2.17348 |
| C  | 2.08626  | 4.3539   | 0.45632  |
| H  | 1.32487  | 2.89075  | -0.92198 |
| C  | 3.23359  | 3.487    | 2.393    |
| H  | 3.38139  | 1.34425  | 2.52774  |
| C  | 4.91245  | -2.2751  | 2.60699  |
| H  | 6.38348  | -1.71877 | 1.13254  |
| H  | 3.23187  | -2.68839 | 3.89286  |
| C  | 3.27497  | 0.27133  | -4.25183 |
| H  | 4.71971  | 1.75611  | -3.65294 |
| H  | 1.74077  | -1.21485 | -4.54031 |
| C  | 2.77365  | 4.57274  | 1.65078  |
| H  | 1.72196  | 5.19452  | -0.12737 |
| H  | 3.77269  | 3.65094  | 3.32198  |
| H  | 5.61102  | -2.86154 | 3.19751  |
| H  | 3.59045  | 0.26689  | -5.29164 |
| H  | 2.94912  | 5.58625  | 2.00033  |
| Br | 0.39075  | -2.84497 | -0.05046 |
| H  | -1.02012 | -0.38214 | -4.29655 |

**Int-5(Z)**

Energy: -2826580.9773395

|    |          |          |          |
|----|----------|----------|----------|
| Pd | -0.44438 | -0.45055 | 0.11030  |
| C  | -2.51647 | 0.01153  | 0.14408  |
| C  | -2.77102 | 0.18006  | -1.31808 |
| O  | -2.24782 | 1.01507  | -2.03298 |
| O  | -3.62368 | -0.75035 | -1.77598 |
| C  | -3.39724 | -0.91407 | 0.92290  |
| C  | -3.36749 | -2.30216 | 0.72044  |
| C  | -4.29716 | -0.39767 | 1.86700  |
| C  | -4.19614 | -3.14175 | 1.45624  |
| H  | -2.67871 | -2.70814 | -0.01259 |





|    |          |          |          |   |          |          |          |
|----|----------|----------|----------|---|----------|----------|----------|
| P  | -1.69901 | -0.4674  | -0.27117 | O | -3.85274 | -2.42365 | -0.72629 |
| C  | -2.46719 | -2.11595 | -0.31049 | O | -3.61573 | -0.23358 | -1.17539 |
| C  | -2.39594 | 0.37162  | 1.20332  | C | -1.36859 | -2.27663 | 0.89139  |
| C  | -2.43705 | 0.445    | -1.67957 | C | -1.22906 | -3.44098 | 0.09471  |
| C  | -3.78872 | -2.30737 | 0.11244  | C | -0.48997 | -2.13497 | 1.99747  |
| C  | -1.72701 | -3.19539 | -0.80444 | C | -0.26805 | -4.39161 | 0.39189  |
| C  | -3.45518 | 1.28194  | 1.10843  | H | -1.86768 | -3.56491 | -0.76907 |
| C  | -1.81267 | 0.11349  | 2.45291  | C | 0.48461  | -3.09607 | 2.27633  |
| C  | -2.06805 | 1.78848  | -1.85677 | H | -0.56866 | -1.28785 | 2.67044  |
| C  | -3.3264  | -0.14877 | -2.57867 | C | 0.60105  | -4.22600 | 1.47878  |
| C  | -4.36808 | -3.57056 | 0.0279   | H | -0.18155 | -5.27071 | -0.24058 |
| H  | -4.3568  | -1.47101 | 0.51103  | H | 1.14946  | -2.94454 | 3.12147  |
| C  | -2.31347 | -4.45619 | -0.88958 | H | 1.35922  | -4.97377 | 1.6928   |
| H  | -0.69005 | -3.04899 | -1.09193 | H | -2.45552 | -0.40081 | 2.47559  |
| C  | -3.91765 | 1.93721  | 2.24889  | H | -1.32634 | 0.52441  | 1.53635  |
| H  | -3.9112  | 1.49189  | 0.14599  | C | -3.37292 | 1.07772  | 1.21512  |
| C  | -2.27954 | 0.77302  | 3.58618  | C | -2.34718 | 0.00543  | 1.46135  |
| H  | -0.98623 | -0.58902 | 2.53007  | C | -4.66677 | 0.93576  | 1.72108  |
| C  | -2.58775 | 2.52265  | -2.91663 | C | -3.05095 | 2.21839  | 0.47557  |
| H  | -1.38669 | 2.26526  | -1.15538 | C | -5.63079 | 1.91223  | 1.47688  |
| C  | -3.83473 | 0.59008  | -3.64897 | H | -4.92386 | 0.04925  | 2.29634  |
| H  | -3.62098 | -1.1856  | -2.44815 | C | -4.01071 | 3.19675  | 0.2339   |
| C  | -3.63136 | -4.64388 | -0.47529 | H | -2.04998 | 2.3161   | 0.05937  |
| H  | -5.39186 | -3.71877 | 0.3597   | C | -5.3049  | 3.04515  | 0.73255  |
| H  | -1.73418 | -5.29448 | -1.26532 | H | -6.63611 | 1.78817  | 1.86995  |
| C  | -3.3276  | 1.68939  | 3.48701  | H | -3.74987 | 4.07565  | -0.34919 |
| H  | -4.7366  | 2.64634  | 2.16558  | H | -6.05531 | 3.80774  | 0.54356  |
| H  | -1.81357 | 0.57642  | 4.54739  | P | 1.72808  | 0.59496  | -0.00665 |
| C  | -3.46932 | 1.92279  | -3.81931 | C | 2.94937  | -0.62951 | -0.58445 |
| H  | -2.29946 | 3.5629   | -3.03823 | C | 2.14804  | 2.15817  | -0.84736 |
| H  | -4.519   | 0.11824  | -4.34857 | C | 2.15684  | 0.8816   | 1.75263  |
| H  | -4.08355 | -5.63004 | -0.53505 | C | 4.26636  | -0.27155 | -0.89722 |
| H  | -3.6827  | 2.20877  | 4.3729   | C | 2.55425  | -1.97091 | -0.65683 |
| H  | -3.86806 | 2.49471  | -4.6525  | C | 3.05881  | 3.07841  | -0.31259 |
| Br | 0.92465  | -2.21303 | 1.4453   | C | 1.53547  | 2.41646  | -2.08167 |
| C  | 4.03056  | -0.56148 | 3.10851  | C | 1.40649  | 1.83319  | 2.46126  |
| H  | 3.11062  | -0.98077 | 3.52488  | C | 3.11666  | 0.12351  | 2.43004  |
| H  | 4.84765  | -1.27842 | 3.18759  | C | 5.18288  | -1.25182 | -1.26993 |
| H  | 4.27906  | 0.36719  | 3.62922  | H | 4.57007  | 0.77103  | -0.85666 |

### TS5(Z)-5η<sup>3</sup>

Energy: -2826578.5052911

|    |          |          |          |   |         |          |          |
|----|----------|----------|----------|---|---------|----------|----------|
| Pd | -0.42417 | -0.19859 | -0.09343 | H | 1.52598 | -2.24651 | -0.4403  |
| C  | -2.20927 | -1.13697 | 0.47082  | C | 3.35865 | 4.24649  | -1.01097 |
| C  | -3.29973 | -1.35927 | -0.53059 | H | 3.52476 | 2.8852   | 0.64992  |
|    |          |          |          | C | 1.84513 | 3.58418  | -2.77499 |
|    |          |          |          | H | 0.82601 | 1.6994   | -2.48981 |
|    |          |          |          | C | 1.6209  | 2.02834  | 3.82153  |
|    |          |          |          | H | 0.65271 | 2.42092  | 1.94111  |

|    |          |          |          |   |          |          |          |
|----|----------|----------|----------|---|----------|----------|----------|
| C  | 3.32169  | 0.31511  | 3.7972   | H | -1.12693 | 3.87975  | 1.89052  |
| H  | 3.69886  | -0.61795 | 1.89138  | C | 0.81486  | 3.59071  | -1.43688 |
| C  | 4.7899   | -2.58985 | -1.32926 | H | -0.33707 | 1.81957  | -1.79602 |
| H  | 6.20261  | -0.9712  | -1.51853 | C | 1.06849  | 4.66082  | -0.57757 |
| H  | 3.16268  | -3.98515 | -1.07858 | H | 0.53148  | 5.60404  | 1.28705  |
| C  | 2.7535   | 4.49923  | -2.24196 | H | 1.38758  | 3.47195  | -2.35172 |
| H  | 4.06366  | 4.95953  | -0.59245 | H | 1.82905  | 5.39527  | -0.8276  |
| H  | 1.37005  | 3.78098  | -3.73192 | P | 1.62797  | -0.55197 | 0.28619  |
| C  | 2.57801  | 1.2648   | 4.49418  | C | 2.22145  | -2.27097 | 0.25544  |
| H  | 1.03861  | 2.77165  | 4.35895  | C | 2.38953  | 0.26315  | -1.17269 |
| H  | 4.06814  | -0.27996 | 4.3162   | C | 2.4825   | 0.24723  | 1.69504  |
| H  | 5.50648  | -3.352   | -1.6233  | C | 3.51337  | -2.577   | -0.19122 |
| H  | 2.98741  | 5.41158  | -2.78383 | C | 1.37775  | -3.29005 | 0.70958  |
| H  | 2.74054  | 1.41105  | 5.55828  | C | 3.53434  | 1.06007  | -1.04575 |
| Br | -0.52817 | -0.76276 | -2.49816 | C | 1.8016   | 0.09356  | -2.43399 |
| C  | -4.64442 | -0.35024 | -2.15682 | C | 2.20233  | 1.60252  | 1.93085  |
| H  | -5.56244 | -0.74442 | -1.71198 | C | 3.38919  | -0.42574 | 2.51644  |
| H  | -4.80204 | 0.66093  | -2.53057 | C | 3.96105  | -3.89516 | -0.1672  |
| H  | -4.32039 | -1.01268 | -2.96366 | H | 4.1606   | -1.78657 | -0.56183 |

### Int-6(Z)

Energy: -2826578.7963990

|    |          |          |          |    |          |          |          |
|----|----------|----------|----------|----|----------|----------|----------|
| Pd | -0.63179 | -0.23958 | 0.25437  | C  | 1.83252  | -4.60643 | 0.73324  |
| C  | -2.66909 | 0.75150  | 0.07398  | H  | 0.3631   | -3.05122 | 1.01471  |
| C  | -3.00923 | 0.73175  | -1.38533 | C  | 4.07723  | 1.68803  | -2.1655  |
| O  | -2.48331 | 1.41104  | -2.24319 | H  | 3.9984   | 1.20277  | -0.0753  |
| O  | -4.01130 | -0.12098 | -1.63625 | C  | 2.34846  | 0.7264   | -3.54663 |
| C  | -3.61418 | 0.07969  | 1.02585  | H  | 0.91106  | -0.5211  | -2.53734 |
| C  | -3.82002 | -1.30759 | 0.99322  | C  | 2.82959  | 2.27239  | 2.97435  |
| C  | -4.30508 | 0.84162  | 1.97606  | H  | 1.50297  | 2.13454  | 1.29031  |
| C  | -4.67813 | -1.91202 | 1.90553  | C  | 4.00474  | 0.24965  | 3.57267  |
| H  | -3.29435 | -1.89804 | 0.24916  | H  | 3.61373  | -1.47294 | 2.33803  |
| C  | -5.16600 | 0.23364  | 2.88870  | C  | 3.12174  | -4.90888 | 0.29706  |
| H  | -4.18319 | 1.92207  | 1.98707  | H  | 4.96181  | -4.13209 | -0.51713 |
| C  | -5.35154 | -1.14646 | 2.85911  | H  | 1.17281  | -5.39719 | 1.07807  |
| H  | -4.81947 | -2.98895 | 1.87318  | C  | 3.48332  | 1.52791  | -3.41601 |
| H  | -5.69673 | 0.84191  | 3.61612  | H  | 4.96282  | 2.30772  | -2.05565 |
| H  | -6.02108 | -1.62308 | 3.56985  | H  | 1.87816  | 0.59695  | -4.51715 |
| H  | -1.88037 | 1.7808   | 1.70123  | C  | 3.72934  | 1.59525  | 3.80163  |
| H  | -0.27048 | 0.35082  | 1.61561  | H  | 2.61059  | 3.32303  | 3.14236  |
| C  | -0.87043 | 2.72946  | 0.0833   | H  | 4.7015   | -0.28161 | 4.21497  |
| C  | -1.75554 | 1.6707   | 0.62492  | H  | 3.47087  | -5.9377  | 0.30867  |
| C  | -0.60116 | 3.80973  | 0.94092  | H  | 3.90254  | 2.02595  | -4.28603 |
| C  | -0.15225 | 2.64402  | -1.12178 | H  | 4.21222  | 2.11725  | 4.62303  |
| C  | 0.34562  | 4.77574  | 0.60893  | Br | -1.09771 | -1.90085 | -1.59564 |
|    |          |          |          | C  | -4.2805  | -0.33468 | -3.02419 |
|    |          |          |          | H  | -3.39289 | -0.75184 | -3.50717 |
|    |          |          |          | H  | -5.10462 | -1.04725 | -3.05472 |
|    |          |          |          | H  | -4.55983 | 0.60117  | -3.51571 |

**Unproductive (Trans Br) (E)-  
Pathway**

**Int-3(E)**

Energy: -2895239.3153925

|    |          |          |          |
|----|----------|----------|----------|
| Pd | -0.69393 | -0.69774 | -0.99708 |
| C  | 0.05079  | 1.44383  | -2.62101 |
| O  | -0.14218 | 1.24331  | -3.80185 |
| O  | 1.24400  | 1.74165  | -2.09203 |
| C  | 2.32635  | 1.73448  | -3.03644 |
| H  | 2.20209  | 2.54390  | -3.76014 |
| H  | 2.36713  | 0.77847  | -3.56013 |
| C  | -1.16971 | 2.29442  | -0.37516 |
| C  | -2.06227 | 1.93754  | 0.64413  |
| C  | -0.47880 | 3.50657  | -0.29957 |
| C  | -2.27041 | 2.79529  | 1.71943  |
| H  | -2.59521 | 0.99316  | 0.59146  |
| C  | -0.67828 | 4.34987  | 0.78992  |
| H  | 0.23071  | 3.77581  | -1.07334 |
| C  | -1.57998 | 4.00361  | 1.79446  |
| H  | -2.96945 | 2.50869  | 2.49948  |
| H  | -0.11631 | 5.27588  | 0.85679  |
| H  | -1.73066 | 4.66745  | 2.64081  |
| C  | -2.49302 | -1.45774 | -1.77406 |
| H  | -2.78109 | -0.94778 | -2.6978  |
| H  | -2.30359 | -2.51141 | -1.97157 |
| C  | -3.41016 | -1.21633 | -0.63693 |
| C  | -4.51239 | -0.34465 | -0.733   |
| C  | -3.16931 | -1.81764 | 0.62007  |
| C  | -5.28419 | -0.02184 | 0.38188  |
| H  | -4.7794  | 0.0665   | -1.70129 |
| C  | -3.94224 | -1.49623 | 1.72949  |
| H  | -2.34375 | -2.51724 | 0.71542  |
| C  | -4.99218 | -0.57955 | 1.6254   |
| H  | -6.12277 | 0.66119  | 0.27408  |
| H  | -3.72292 | -1.96714 | 2.68429  |
| H  | -5.58971 | -0.32516 | 2.49641  |
| P  | 1.21725  | -0.19492 | 0.43057  |
| C  | 0.99264  | -1.27426 | 1.89921  |
| C  | 2.8387   | -0.63701 | -0.30241 |
| C  | 1.6072   | 1.42613  | 1.23797  |
| C  | 1.99661  | -2.08811 | 2.42716  |
| C  | -0.27796 | -1.28136 | 2.49195  |
| C  | 4.04655  | -0.38655 | 0.36708  |
| C  | 2.87439  | -1.21831 | -1.57519 |
| C  | 2.4893   | 2.33474  | 0.63448  |

|    |          |          |          |
|----|----------|----------|----------|
| C  | 1.03439  | 1.77658  | 2.46666  |
| C  | 1.73643  | -2.8872  | 3.53984  |
| H  | 2.97443  | -2.12325 | 1.95862  |
| C  | -0.52991 | -2.06815 | 3.61102  |
| H  | -1.08094 | -0.68925 | 2.05995  |
| C  | 5.26345  | -0.71434 | -0.22548 |
| H  | 4.03408  | 0.07952  | 1.34834  |
| C  | 4.09386  | -1.54109 | -2.16792 |
| H  | 1.94406  | -1.43081 | -2.09244 |
| C  | 2.80402  | 3.5436   | 1.24725  |
| H  | 2.95616  | 2.08254  | -0.30852 |
| C  | 1.34853  | 2.98805  | 3.07877  |
| H  | 0.35051  | 1.09844  | 2.96409  |
| C  | 0.47812  | -2.87555 | 4.13789  |
| H  | 2.52064  | -3.52733 | 3.93455  |
| H  | -1.51896 | -2.06226 | 4.06075  |
| C  | 5.28886  | -1.29108 | -1.49578 |
| H  | 6.19135  | -0.5172  | 0.30428  |
| H  | 4.10589  | -1.99366 | -3.15547 |
| C  | 2.23711  | 3.87499  | 2.47674  |
| H  | 3.5013   | 4.22343  | 0.7648   |
| H  | 0.89347  | 3.2348   | 4.03382  |
| H  | 0.27949  | -3.50199 | 5.00303  |
| H  | 6.23854  | -1.5449  | -1.95885 |
| H  | 2.4864   | 4.81528  | 2.96066  |
| Br | 0.00483  | -3.07976 | -0.78279 |
| H  | 3.23163  | 1.87349  | -2.44725 |
| C  | -1.04703 | 1.39645  | -1.58384 |
| N  | -2.21694 | 1.4662   | -2.29368 |
| N  | -3.18755 | 1.48485  | -2.8539  |

**TS3-4(E)**

Energy: -2895231.2398664

|    |          |          |          |
|----|----------|----------|----------|
| Pd | -0.62436 | 0.59790  | 1.08189  |
| C  | 0.16466  | -1.78599 | 2.38611  |
| O  | -0.03105 | -1.93250 | 3.57474  |
| O  | 1.37498  | -1.88924 | 1.81753  |
| C  | 2.46322  | -2.06645 | 2.73608  |
| H  | 2.40197  | -3.04836 | 3.21216  |
| H  | 2.44359  | -1.28867 | 3.50151  |
| C  | -1.19616 | -2.25311 | 0.20278  |
| C  | -2.12576 | -1.79360 | -0.74465 |
| C  | -0.61765 | -3.51935 | 0.03887  |
| C  | -2.48786 | -2.59753 | -1.81848 |
| H  | -2.56948 | -0.81082 | -0.62292 |
| C  | -0.96146 | -4.30808 | -1.05355 |



|    |          |          |          |   |          |          |          |
|----|----------|----------|----------|---|----------|----------|----------|
| C  | -0.60572 | -1.07332 | 1.879    | C | 2.89087  | -2.78036 | -0.12344 |
| C  | -3.03177 | 1.5895   | 2.13929  | C | 3.39413  | -1.10781 | 2.06760  |
| C  | -0.86794 | 2.55035  | 1.62579  | H | 2.01015  | 0.26346  | 1.14250  |
| C  | -3.51648 | -1.72822 | 0.82437  | C | 3.78381  | -3.17549 | 0.85710  |
| C  | -3.30975 | -0.50635 | -1.25846 | H | 2.70225  | -3.41575 | -0.98316 |
| C  | -0.39007 | -2.43098 | 1.5977   | C | 4.02514  | -2.34586 | 1.96076  |
| C  | -0.15538 | -0.55078 | 3.09667  | H | 3.59092  | -0.46278 | 2.91745  |
| C  | -3.34468 | 2.71266  | 2.90286  | H | 4.29300  | -4.13136 | 0.77555  |
| H  | -3.75479 | 0.78577  | 2.03389  | H | 4.71551  | -2.66948 | 2.73518  |
| C  | -1.18023 | 3.66239  | 2.40224  | H | 2.48466  | 0.01948  | -2.75451 |
| H  | 0.08182  | 2.49934  | 1.10006  | H | 1.50416  | 1.52918  | -2.88488 |
| C  | -4.669   | -2.34821 | 0.3439   | C | 2.97892  | 1.52494  | -1.28176 |
| H  | -3.14533 | -1.96967 | 1.81616  | C | 2.06585  | 0.87087  | -2.22043 |
| C  | -4.46486 | -1.12535 | -1.72942 | C | 4.16628  | 0.88797  | -0.87031 |
| H  | -2.77737 | 0.21436  | -1.87432 | C | 2.68509  | 2.79311  | -0.73256 |
| C  | 0.26465  | -3.24491 | 2.51552  | C | 5.02967  | 1.49225  | 0.04183  |
| H  | -0.71928 | -2.8398  | 0.6468   | H | 4.40939  | -0.0884  | -1.2808  |
| C  | 0.50506  | -1.37027 | 4.01193  | C | 3.54431  | 3.38701  | 0.18079  |
| H  | -0.31574 | 0.49683  | 3.33128  | H | 1.76479  | 3.28834  | -1.03123 |
| C  | -2.419   | 3.74628  | 3.03849  | C | 4.72108  | 2.73988  | 0.57682  |
| H  | -4.31355 | 2.78013  | 3.38968  | H | 5.93993  | 0.97885  | 0.33977  |
| H  | -0.46297 | 4.47298  | 2.49286  | H | 3.30078  | 4.36535  | 0.58728  |
| C  | -5.14295 | -2.04959 | -0.93315 | H | 5.39012  | 3.21072  | 1.29201  |
| H  | -5.19551 | -3.06465 | 0.96843  | P | -1.40872 | 0.00451  | 0.53293  |
| H  | -4.8326  | -0.88694 | -2.72347 | C | -2.13682 | 1.41741  | 1.42603  |
| C  | 0.72051  | -2.71542 | 3.72373  | C | -2.8066  | -0.91113 | -0.2023  |
| H  | 0.43443  | -4.29145 | 2.27954  | C | -0.75291 | -1.05725 | 1.87616  |
| H  | 0.85238  | -0.95085 | 4.95211  | C | -3.42718 | 1.35186  | 1.96245  |
| H  | -2.66623 | 4.62179  | 3.63253  | C | -1.352   | 2.55857  | 1.63273  |
| H  | -6.04038 | -2.53526 | -1.30671 | C | -3.46248 | -1.9569  | 0.45672  |
| H  | 1.24196  | -3.34998 | 4.43466  | C | -3.20869 | -0.5395  | -1.49319 |
| Br | -1.06958 | 2.50796  | -1.82416 | C | -0.40375 | -2.38702 | 1.59608  |
| C  | -1.40387 | -3.30639 | -2.72142 | C | -0.44609 | -0.52221 | 3.13241  |
| H  | -0.95258 | -4.29562 | -2.83858 | C | -3.9267  | 2.42007  | 2.70414  |
| H  | -2.42568 | -3.38336 | -2.35108 | H | -4.04227 | 0.47237  | 1.79428  |
| H  | -1.38322 | -2.78666 | -3.6825  | C | -1.8522  | 3.61781  | 2.38559  |

### TS4-5(E)

Energy: -2826560.2390615

|    |          |          |          |   |          |          |         |
|----|----------|----------|----------|---|----------|----------|---------|
| Pd | 0.21113  | 0.48978  | -1.02308 | H | -2.69648 | 0.27521  | -2.0007 |
| C  | 1.21429  | -1.13430 | -0.95210 | C | 0.2364   | -3.16363 | 2.55567 |
| C  | 0.76741  | -2.09855 | -1.99154 | H | -0.61527 | -2.80119 | 0.61476 |
| O  | 1.42472  | -2.42261 | -2.96111 | C | 0.20423  | -1.30269 | 4.08812 |
| O  | -0.48151 | -2.53381 | -1.74203 | H | -0.7103  | 0.50479  | 3.36517 |
| C  | 2.22101  | -1.53560 | -0.02253 | C | -3.139   | 3.55074  | 2.9192  |
| C  | 2.51506  | -0.69426 | 1.07709  | H | -4.9324  | 2.36968  | 3.11194 |
|    |          |          |          | H | -1.24276 | 4.50385  | 2.5378  |

|    |          |          |          |   |          |          |          |
|----|----------|----------|----------|---|----------|----------|----------|
| C  | -4.90211 | -2.2649  | -1.45997 | H | -6.09113 | -2.64035 | 1.72079  |
| H  | -5.00842 | -3.44814 | 0.33916  | P | 1.36576  | 0.18778  | 0.4354   |
| H  | -4.56387 | -0.92187 | -3.11409 | C | 2.40242  | -0.83378 | 1.54099  |
| C  | 0.54889  | -2.62163 | 3.80302  | C | 2.54838  | 0.98983  | -0.70583 |
| H  | 0.51068  | -4.18802 | 2.32106  | C | 0.73691  | 1.48913  | 1.55242  |
| H  | 0.44064  | -0.87409 | 5.05813  | C | 3.72343  | -0.4644  | 1.81655  |
| H  | -3.53189 | 4.38386  | 3.4955   | C | 1.84185  | -1.94495 | 2.18149  |
| H  | -5.71423 | -2.79444 | -1.95071 | C | 3.05597  | 2.27698  | -0.49524 |
| H  | 1.06117  | -3.22529 | 4.54676  | C | 2.98081  | 0.24438  | -1.81341 |
| Br | -0.90927 | 2.60291  | -1.80859 | C | 0.20725  | 2.67864  | 1.02957  |
| C  | -1.0935  | -3.33139 | -2.76167 | C | 0.70614  | 1.27575  | 2.9371   |
| H  | -0.56998 | -4.28491 | -2.87543 | C | 4.47695  | -1.20389 | 2.72545  |
| H  | -2.11864 | -3.48459 | -2.4255  | H | 4.16519  | 0.39367  | 1.31846  |
| H  | -1.07936 | -2.79893 | -3.71582 | C | 2.59589  | -2.67284 | 3.09787  |

### Int-5(E)

Energy: -2826594.6553266

|    |          |          |          |    |          |          |          |
|----|----------|----------|----------|----|----------|----------|----------|
| Pd | -0.08113 | -1.02195 | -0.76761 | H  | 2.59524  | -0.76033 | -1.9733  |
| C  | -1.56356 | 0.36368  | -1.25174 | C  | -0.32108 | 3.64267  | 1.88089  |
| C  | -0.85713 | 1.01459  | -2.40298 | H  | 0.18338  | 2.83158  | -0.04222 |
| O  | -0.80135 | 0.55225  | -3.52872 | C  | 0.16296  | 2.24081  | 3.78213  |
| O  | -0.20867 | 2.15116  | -2.05980 | H  | 1.10976  | 0.36123  | 3.35896  |
| C  | -2.21901 | 1.23124  | -0.23214 | C  | 3.91371  | -2.3054  | 3.36846  |
| C  | -2.39267 | 0.78655  | 1.08725  | H  | 5.50558  | -0.91971 | 2.92857  |
| C  | -2.76012 | 2.47417  | -0.58822 | H  | 2.15831  | -3.53896 | 3.58547  |
| C  | -3.07806 | 1.55565  | 2.01833  | C  | 4.39142  | 2.08306  | -2.50109 |
| H  | -1.97383 | -0.17180 | 1.37668  | H  | 4.35617  | 3.82348  | -1.22998 |
| C  | -3.44937 | 3.24672  | 0.34389  | H  | 4.2281   | 0.20984  | -3.55965 |
| H  | -2.63887 | 2.84146  | -1.60261 | C  | -0.34833 | 3.42592  | 3.25765  |
| C  | -3.61019 | 2.79135  | 1.65097  | H  | -0.74147 | 4.55098  | 1.46117  |
| H  | -3.18584 | 1.19408  | 3.03635  | H  | 0.14484  | 2.06434  | 4.85392  |
| H  | -3.86236 | 4.20662  | 0.04527  | H  | 4.50442  | -2.88245 | 4.07448  |
| H  | -4.1423  | 3.39655  | 2.37962  | H  | 5.10198  | 2.51125  | -3.20259 |
| H  | -2.75566 | -0.63393 | -2.7376  | H  | -0.77462 | 4.17527  | 3.91867  |
| H  | -1.6473  | -1.70106 | -1.99718 | Br | 1.10158  | -3.17568 | -0.93788 |
| C  | -3.41239 | -1.3928  | -0.80735 | C  | 0.62591  | 2.71034  | -3.07929 |
| C  | -2.36033 | -0.861   | -1.74    | H  | 0.03497  | 2.98245  | -3.95768 |
| C  | -4.66338 | -0.7722  | -0.73479 | H  | 1.08237  | 3.59174  | -2.62973 |
| C  | -3.14386 | -2.47902 | 0.03099  | H  | 1.40009  | 1.9968   | -3.36987 |
| C  | -5.62185 | -1.2165  | 0.17123  |    |          |          |          |
| H  | -4.87182 | 0.08264  | -1.3728  |    |          |          |          |
| C  | -4.10356 | -2.92629 | 0.938    |    |          |          |          |
| H  | -2.17498 | -2.97358 | -0.02443 |    |          |          |          |
| C  | -5.34317 | -2.29369 | 1.01304  |    |          |          |          |
| H  | -6.58609 | -0.71862 | 0.22379  |    |          |          |          |
| H  | -3.88133 | -3.77188 | 1.58316  |    |          |          |          |

### TS5-6(E)

Energy: -2826571.5131099

|    |          |          |          |
|----|----------|----------|----------|
| Pd | -0.02569 | -0.68063 | -1.36309 |
| C  | -1.88207 | 0.48242  | -1.42292 |
| C  | -1.61293 | 1.17730  | -2.73577 |





|    |          |          |          |    |          |          |          |
|----|----------|----------|----------|----|----------|----------|----------|
| H  | -4.06809 | -2.37662 | -1.16748 | Pd | 0.53238  | 0.22871  | -0.79877 |
| C  | -6.71186 | -0.24136 | -1.04787 | C  | 2.07458  | 0.50659  | 0.73326  |
| H  | -6.56691 | 1.90522  | -1.18551 | C  | 1.26543  | 1.41784  | 1.62534  |
| H  | -6.53559 | -2.38692 | -0.94908 | O  | 0.52810  | 1.03142  | 2.51211  |
| H  | -7.79379 | -0.24345 | -0.94866 | O  | 1.45777  | 2.70308  | 1.31546  |
| P  | 1.70584  | 0.09926  | -0.04706 | C  | 3.43930  | 0.98748  | 0.34677  |
| C  | 3.12697  | -0.99686 | -0.40261 | C  | 4.53788  | 0.40061  | 0.98547  |
| C  | 2.00569  | 1.52844  | -1.15016 | C  | 3.65584  | 2.03223  | -0.55832 |
| C  | 2.06011  | 0.6838   | 1.65014  | C  | 5.83267  | 0.83381  | 0.70710  |
| C  | 4.00413  | -0.75878 | -1.46512 | H  | 4.37384  | -0.40816 | 1.69178  |
| C  | 3.328    | -2.10771 | 0.42894  | C  | 4.94934  | 2.46360  | -0.83507 |
| C  | 2.89605  | 2.55418  | -0.80858 | H  | 2.80392  | 2.49224  | -1.04835 |
| C  | 1.38481  | 1.54288  | -2.40422 | C  | 6.04217  | 1.86446  | -0.20656 |
| C  | 0.99882  | 1.02409  | 2.49427  | H  | 6.67595  | 0.36172  | 1.20339  |
| C  | 3.37872  | 0.79917  | 2.1148   | H  | 5.10429  | 3.26818  | -1.54842 |
| C  | 5.07644  | -1.62241 | -1.68965 | H  | 7.0512   | 2.20017  | -0.42918 |
| H  | 3.85795  | 0.09766  | -2.11538 | H  | 0.94948  | -1.06873 | 1.55046  |
| C  | 4.40357  | -2.95853 | 0.20552  | H  | 1.77119  | 0.52514  | -1.64138 |
| H  | 2.63199  | -2.31105 | 1.23673  | C  | 2.42958  | -2.00999 | 0.27766  |
| C  | 3.16218  | 3.5773   | -1.71499 | C  | 1.69483  | -0.84283 | 0.79067  |
| H  | 3.37504  | 2.55685  | 0.16553  | C  | 2.29219  | -3.224   | 0.97073  |
| C  | 1.65016  | 2.5707   | -3.30712 | C  | 3.25194  | -1.97824 | -0.86213 |
| H  | 0.68248  | 0.75527  | -2.66394 | C  | 2.96028  | -4.36967 | 0.54702  |
| C  | 1.25063  | 1.49187  | 3.78139  | H  | 1.65986  | -3.26035 | 1.85411  |
| H  | -0.02123 | 0.92197  | 2.14809  | C  | 3.91271  | -3.12431 | -1.28627 |
| C  | 3.62521  | 1.27293  | 3.4013   | H  | 3.36303  | -1.05239 | -1.41592 |
| H  | 4.20755  | 0.50551  | 1.47687  | C  | 3.77141  | -4.32414 | -0.58532 |
| C  | 5.27894  | -2.7189  | -0.85543 | H  | 2.84552  | -5.29731 | 1.1009   |
| H  | 5.75298  | -1.43311 | -2.5183  | H  | 4.54054  | -3.08229 | -2.17169 |
| H  | 4.54953  | -3.81939 | 0.85121  | H  | 4.28897  | -5.21749 | -0.92327 |
| C  | 2.54063  | 3.58728  | -2.96483 | P  | -1.68072 | -0.17845 | 0.18569  |
| H  | 3.85231  | 4.37108  | -1.44304 | C  | -2.31755 | 1.35142  | 0.95762  |
| H  | 1.15031  | 2.58076  | -4.27076 | C  | -2.9606  | -0.61624 | -1.05271 |
| C  | 2.56231  | 1.621    | 4.23569  | C  | -1.92623 | -1.55851 | 1.36735  |
| H  | 0.41488  | 1.74394  | 4.42792  | C  | -2.68501 | 2.39522  | 0.09308  |
| H  | 4.64861  | 1.35977  | 3.75544  | C  | -2.34603 | 1.56473  | 2.34089  |
| H  | 6.11417  | -3.39066 | -1.03303 | C  | -4.31023 | -0.298   | -0.8642  |
| H  | 2.74478  | 4.39048  | -3.66717 | C  | -2.57969 | -1.37717 | -2.16313 |
| H  | 2.75816  | 1.98159  | 5.24181  | C  | -1.11599 | -2.68623 | 1.187    |
| Br | 0.26556  | -3.3449  | -0.43306 | C  | -2.95496 | -1.60554 | 2.31679  |
| C  | -0.1109  | 3.88538  | -0.1372  | C  | -3.11476 | 3.61446  | 0.61068  |
| H  | -0.97937 | 4.55093  | -0.14788 | H  | -2.61982 | 2.2509   | -0.98215 |
| H  | 0.58998  | 4.17902  | 0.64338  | C  | -2.79086 | 2.78287  | 2.85233  |
| H  | 0.37268  | 3.91037  | -1.11495 | H  | -1.99516 | 0.79594  | 3.0186   |
|    |          |          |          | C  | -5.26517 | -0.73003 | -1.78139 |
|    |          |          |          | H  | -4.6143  | 0.29509  | -0.00636 |
|    |          |          |          | C  | -3.53837 | -1.81581 | -3.07302 |
|    |          |          |          | H  | -1.53068 | -1.60484 | -2.32781 |

**Int-6(E)**

Energy: -2826574.6720679

|    |          |          |          |
|----|----------|----------|----------|
| C  | -1.30176 | -3.8257  | 1.96693  |
| H  | -0.34577 | -2.67948 | 0.42061  |
| C  | -3.13201 | -2.74116 | 3.10354  |
| H  | -3.62645 | -0.76101 | 2.43567  |
| C  | -3.18204 | 3.80719  | 1.99166  |
| H  | -3.39708 | 4.41413  | -0.06815 |
| H  | -2.816   | 2.93318  | 3.92794  |
| C  | -4.88086 | -1.49042 | -2.88569 |
| H  | -6.31033 | -0.47286 | -1.63262 |
| H  | -3.23219 | -2.39823 | -3.93723 |
| C  | -2.3023  | -3.85032 | 2.93661  |
| H  | -0.66335 | -4.69116 | 1.81209  |
| H  | -3.92776 | -2.76332 | 3.84299  |
| H  | -3.52577 | 4.75629  | 2.3937   |
| H  | -5.62678 | -1.82462 | -3.60158 |
| H  | -2.44512 | -4.73425 | 3.55183  |
| Br | -0.438   | 1.27057  | -2.78638 |
| C  | 0.62012  | 3.64344  | 1.9987   |
| H  | 0.61745  | 3.45149  | 3.0741   |
| H  | 1.04176  | 4.62402  | 1.77926  |
| H  | -0.4011  | 3.57255  | 1.61741  |

**Unproductive (Trans Br) (Z)-  
Pathway**

**Int-3(Z)**

Energy: -2895237.3110457

|    |          |         |          |
|----|----------|---------|----------|
| Pd | 0.81217  | 0.16318 | -1.14051 |
| C  | 1.05029  | 2.52230 | 0.64355  |
| O  | 1.92825  | 3.34673 | 0.78004  |
| O  | 0.62443  | 1.70279 | 1.60341  |
| C  | 1.41792  | 1.70269 | 2.80250  |
| H  | 1.33753  | 2.66445 | 3.31521  |
| H  | 2.46076  | 1.50052 | 2.54830  |
| C  | -1.16267 | 2.49899 | -0.79503 |
| C  | -1.82937 | 2.05702 | -1.94388 |
| C  | -1.85771 | 3.22542 | 0.17387  |
| C  | -3.17700 | 2.35113 | -2.12454 |
| H  | -1.28535 | 1.47436 | -2.68334 |
| C  | -3.21034 | 3.50286 | -0.00478 |
| H  | -1.35208 | 3.55629 | 1.07506  |
| C  | -3.86912 | 3.07704 | -1.15589 |
| H  | -3.68743 | 2.00355 | -3.01794 |
| H  | -3.75088 | 4.04204 | 0.76614  |
| H  | -4.92457 | 3.29495 | -1.28918 |

|   |          |          |          |
|---|----------|----------|----------|
| C | 2.67447  | 0.54693  | -2.02276 |
| H | 2.79469  | -0.16614 | -2.83662 |
| H | 2.6949   | 1.56671  | -2.41722 |
| C | 3.61806  | 0.33777  | -0.90313 |
| C | 4.06581  | -0.95323 | -0.55171 |
| C | 4.07524  | 1.41855  | -0.12732 |
| C | 4.89518  | -1.14979 | 0.54613  |
| H | 3.71874  | -1.80017 | -1.13531 |
| C | 4.89763  | 1.22     | 0.97899  |
| H | 3.7755   | 2.42672  | -0.39174 |
| C | 5.30572  | -0.06697 | 1.32909  |
| H | 5.22232  | -2.15627 | 0.79487  |
| H | 5.22612  | 2.07686  | 1.56156  |
| H | 5.94936  | -0.22438 | 2.19041  |
| P | -0.93945 | -0.75554 | 0.34383  |
| C | -1.85054 | -2.15083 | -0.42291 |
| C | -0.03418 | -1.4539  | 1.78257  |
| C | -2.35059 | 0.12539  | 1.16313  |
| C | -2.1474  | -3.34132 | 0.24327  |
| C | -2.30533 | -1.96596 | -1.73542 |
| C | -0.68333 | -1.87297 | 2.95422  |
| C | 1.36324  | -1.53023 | 1.72062  |
| C | -2.18304 | 0.81946  | 2.37131  |
| C | -3.62335 | 0.11709  | 0.57765  |
| C | -2.90195 | -4.32801 | -0.39041 |
| H | -1.77747 | -3.51175 | 1.24907  |
| C | -3.07393 | -2.94351 | -2.35899 |
| H | -2.0304  | -1.06176 | -2.2715  |
| C | 0.05204  | -2.34853 | 4.03817  |
| H | -1.76506 | -1.80845 | 3.02816  |
| C | 2.0972   | -2.00102 | 2.80662  |
| H | 1.88514  | -1.20808 | 0.82449  |
| C | -3.2534  | 1.46854  | 2.97986  |
| H | -1.21536 | 0.83303  | 2.85421  |
| C | -4.69338 | 0.76943  | 1.18613  |
| H | -3.79056 | -0.41314 | -0.35337 |
| C | -3.37321 | -4.12855 | -1.68644 |
| H | -3.11873 | -5.25615 | 0.13134  |
| H | -3.41809 | -2.79113 | -3.3781  |
| C | 1.44454  | -2.4094  | 3.96845  |
| H | -0.46441 | -2.66782 | 4.93935  |
| H | 3.18031  | -2.03241 | 2.73499  |
| C | -4.51644 | 1.44533  | 2.39071  |
| H | -3.09882 | 1.98696  | 3.92253  |
| H | -5.67083 | 0.74394  | 0.71252  |
| H | -3.96092 | -4.89958 | -2.17699 |
| H | 2.01622  | -2.77249 | 4.81835  |

|    |          |          |          |
|----|----------|----------|----------|
| H  | -5.35438 | 1.94595  | 2.86798  |
| Br | 1.07102  | -2.12417 | -2.05876 |
| H  | 1.0173   | 0.89234  | 3.41087  |
| C  | 0.32576  | 2.26486  | -0.66097 |
| N  | 0.95515  | 3.04049  | -1.60764 |
| N  | 1.48632  | 3.61354  | -2.41167 |

**TS3-4(Z)**

Energy: -2895230.9564330

|    |          |          |          |
|----|----------|----------|----------|
| Pd | -0.75184 | -0.06385 | -1.16255 |
| C  | -1.20993 | -2.29191 | 0.73916  |
| O  | -1.92924 | -3.24956 | 0.93298  |
| O  | -0.99921 | -1.31960 | 1.62605  |
| C  | -1.77309 | -1.38609 | 2.83225  |
| H  | -1.55341 | -2.30555 | 3.38112  |
| H  | -2.83589 | -1.34428 | 2.58359  |
| C  | 0.91787  | -2.54216 | -0.67930 |
| C  | 1.67152  | -2.23177 | -1.82164 |
| C  | 1.46405  | -3.38768 | 0.29349  |
| C  | 2.94598  | -2.75858 | -1.98733 |
| H  | 1.23765  | -1.57252 | -2.56964 |
| C  | 2.74940  | -3.89748 | 0.13520  |
| H  | 0.88931  | -3.63832 | 1.17935  |
| C  | 3.48700  | -3.59209 | -1.00673 |
| H  | 3.52076  | -2.5141  | -2.87574 |
| H  | 3.17601  | -4.5284  | 0.90819  |
| H  | 4.48843  | -3.99478 | -1.12859 |
| C  | -2.59626 | -0.35859 | -2.1219  |
| H  | -2.68171 | 0.43372  | -2.86351 |
| H  | -2.61286 | -1.3338  | -2.61363 |
| C  | -3.55802 | -0.23161 | -1.0057  |
| C  | -3.96574 | 1.03772  | -0.54319 |
| C  | -4.06462 | -1.35994 | -0.33493 |
| C  | -4.80438 | 1.16571  | 0.55773  |
| H  | -3.57929 | 1.91981  | -1.0458  |
| C  | -4.90309 | -1.23108 | 0.76958  |
| H  | -3.79482 | -2.35352 | -0.67791 |
| C  | -5.2711  | 0.03308  | 1.2306   |
| H  | -5.1     | 2.15736  | 0.89163  |
| H  | -5.2707  | -2.12443 | 1.26768  |
| H  | -5.92595 | 0.13513  | 2.09169  |
| P  | 0.99343  | 0.77546  | 0.32683  |
| C  | 2.09731  | 1.98102  | -0.50188 |
| C  | 0.1634   | 1.64994  | 1.70944  |
| C  | 2.23195  | -0.26682 | 1.22131  |

|    |          |          |          |
|----|----------|----------|----------|
| C  | 2.55475  | 3.15402  | 0.10185  |
| C  | 2.52327  | 1.66378  | -1.79841 |
| C  | 0.86542  | 2.0833   | 2.84445  |
| C  | -1.223   | 1.83713  | 1.65621  |
| C  | 1.92103  | -0.87086 | 2.44925  |
| C  | 3.49897  | -0.49431 | 0.66922  |
| C  | 3.44017  | 3.98996  | -0.57716 |
| H  | 2.20621  | 3.43229  | 1.09074  |
| C  | 3.42041  | 2.49041  | -2.46706 |
| H  | 2.12442  | 0.78046  | -2.28908 |
| C  | 0.19283  | 2.69985  | 3.89748  |
| H  | 1.93635  | 1.9161   | 2.91748  |
| C  | -1.89455 | 2.44483  | 2.71412  |
| H  | -1.78323 | 1.49135  | 0.79395  |
| C  | 2.85406  | -1.6649  | 3.11022  |
| H  | 0.95215  | -0.70062 | 2.90104  |
| C  | 4.42976  | -1.29171 | 1.33107  |
| H  | 3.76945  | -0.03854 | -0.2772  |
| C  | 3.88128  | 3.65678  | -1.85621 |
| H  | 3.78146  | 4.907    | -0.1048  |
| H  | 3.7405   | 2.23705  | -3.47382 |
| C  | -1.18937 | 2.88033  | 3.83513  |
| H  | 0.74873  | 3.03179  | 4.77005  |
| H  | -2.97254 | 2.56409  | 2.65615  |
| C  | 4.1146   | -1.87785 | 2.5547   |
| H  | 2.5954   | -2.1116  | 4.06665  |
| H  | 5.40695  | -1.45217 | 0.88433  |
| H  | 4.57076  | 4.31121  | -2.38229 |
| H  | -1.71362 | 3.35356  | 4.66105  |
| H  | 4.84527  | -2.49321 | 3.07233  |
| Br | -0.89369 | 2.29557  | -1.9871  |
| H  | -1.4831  | -0.50322 | 3.40149  |
| C  | -0.46514 | -1.98666 | -0.54904 |
| N  | -1.29627 | -3.10813 | -1.53562 |
| N  | -1.75132 | -3.52371 | -2.46114 |

**Int-4(Z)**

Energy: -2826557.9935816

|    |          |         |          |
|----|----------|---------|----------|
| Pd | 0.59391  | 0.03898 | -1.13218 |
| C  | 0.29780  | 1.79946 | -0.44110 |
| C  | 1.19179  | 2.20854 | 0.66862  |
| O  | 1.74476  | 3.29271 | 0.71133  |
| O  | 1.39734  | 1.22017 | 1.54872  |
| C  | -0.79585 | 2.66000 | -0.80254 |
| C  | -1.53288 | 2.37957 | -1.97837 |

|   |          |          |          |
|---|----------|----------|----------|
| C | -1.21503 | 3.73544  | 0.01446  |
| C | -2.65239 | 3.12497  | -2.30999 |
| H | -1.19134 | 1.56476  | -2.61170 |
| C | -2.33362 | 4.48150  | -0.32486 |
| H | -0.66207 | 3.96376  | 0.91767  |
| C | -3.05398 | 4.17786  | -1.48210 |
| H | -3.20922 | 2.89878  | -3.21437 |
| H | -2.65548 | 5.29515  | 0.31783  |
| H | -3.92985 | 4.766    | -1.74263 |
| H | 2.27305  | -0.17027 | -3.10578 |
| H | 2.07951  | 1.59413  | -2.76437 |
| C | 3.39104  | 0.56381  | -1.3958  |
| C | 2.26189  | 0.60512  | -2.34196 |
| C | 3.94291  | -0.6631  | -0.96869 |
| C | 3.93879  | 1.74875  | -0.86918 |
| C | 4.98345  | -0.69645 | -0.0485  |
| H | 3.51989  | -1.5848  | -1.35863 |
| C | 4.98923  | 1.7127   | 0.04311  |
| H | 3.52343  | 2.7049   | -1.17339 |
| C | 5.51377  | 0.49006  | 0.46619  |
| H | 5.39025  | -1.65459 | 0.2655   |
| H | 5.39509  | 2.6443   | 0.42891  |
| H | 6.33134  | 0.46178  | 1.18153  |
| P | -0.96445 | -0.82749 | 0.43195  |
| C | -2.15435 | -2.02376 | -0.26796 |
| C | -0.08629 | -1.63733 | 1.81385  |
| C | -2.05663 | 0.40752  | 1.2463   |
| C | -2.68312 | -3.08488 | 0.47178  |
| C | -2.57528 | -1.82276 | -1.58878 |
| C | -0.72456 | -1.91047 | 3.03247  |
| C | 1.27081  | -1.94934 | 1.66222  |
| C | -1.63613 | 1.10092  | 2.39029  |
| C | -3.2651  | 0.77239  | 0.63889  |
| C | -3.63695 | -3.92502 | -0.0999  |
| H | -2.3409  | -3.27125 | 1.48447  |
| C | -3.53915 | -2.65458 | -2.15042 |
| H | -2.11981 | -1.03371 | -2.18032 |
| C | -0.0173  | -2.49715 | 4.07958  |
| H | -1.7683  | -1.64234 | 3.17189  |
| C | 1.97449  | -2.53036 | 2.7145   |
| H | 1.77465  | -1.73191 | 0.72557  |
| C | -2.42118 | 2.11957  | 2.92572  |
| H | -0.69332 | 0.84344  | 2.8595   |
| C | -4.04038 | 1.79963  | 1.17141  |
| H | -3.60491 | 0.25135  | -0.25075 |
| C | -4.07169 | -3.70703 | -1.40612 |
| H | -4.03673 | -4.75444 | 0.47674  |

|    |          |          |          |
|----|----------|----------|----------|
| H  | -3.85568 | -2.49561 | -3.17724 |
| C  | 1.3337   | -2.80663 | 3.92201  |
| H  | -0.52026 | -2.70522 | 5.01983  |
| H  | 3.02811  | -2.76116 | 2.58668  |
| C  | -3.62553 | 2.4724   | 2.31907  |
| H  | -2.08704 | 2.63939  | 3.81962  |
| H  | -4.97122 | 2.07439  | 0.6838   |
| H  | -4.81401 | -4.36525 | -1.84894 |
| H  | 1.88625  | -3.25839 | 4.74138  |
| H  | -4.2341  | 3.27044  | 2.73484  |
| Br | 0.84571  | -2.31367 | -2.02733 |
| C  | 2.37351  | 1.45782  | 2.56843  |
| H  | 2.13932  | 2.36942  | 3.12555  |
| H  | 2.32541  | 0.58036  | 3.21318  |
| H  | 3.36361  | 1.54571  | 2.11515  |

### TS4-5(Z)

Energy: -2826556.0880863

|    |          |          |          |
|----|----------|----------|----------|
| Pd | 0.57871  | -0.22676 | -0.84980 |
| C  | 0.95785  | 1.52394  | -0.18983 |
| C  | 1.98194  | 1.63588  | 0.88569  |
| O  | 2.81257  | 2.52467  | 0.94573  |
| O  | 1.94560  | 0.59186  | 1.72535  |
| C  | 0.26453  | 2.71940  | -0.60428 |
| C  | -0.53511 | 2.68214  | -1.77140 |
| C  | 0.27478  | 3.90758  | 0.16123  |
| C  | -1.29482 | 3.77584  | -2.15194 |
| H  | -0.53351 | 1.77014  | -2.36266 |
| C  | -0.49677 | 4.99708  | -0.21881 |
| H  | 0.87771  | 3.95807  | 1.05919  |
| C  | -1.27941 | 4.93664  | -1.37260 |
| H  | -1.89921 | 3.73029  | -3.05295 |
| H  | -0.49277 | 5.89720  | 0.38859  |
| H  | -1.87769 | 5.79473  | -1.66695 |
| H  | 2.19719  | -0.27587 | -2.70034 |
| H  | 2.593    | 1.39789  | -2.15576 |
| C  | 3.6426   | -0.14824 | -1.07997 |
| C  | 2.50642  | 0.35247  | -1.86286 |
| C  | 3.76916  | -1.51636 | -0.75723 |
| C  | 4.63821  | 0.73459  | -0.61943 |
| C  | 4.84186  | -1.97169 | -0.00238 |
| H  | 3.00358  | -2.20635 | -1.10139 |
| C  | 5.71674  | 0.27241  | 0.13018  |
| H  | 4.55495  | 1.79181  | -0.85026 |
| C  | 5.82113  | -1.08161 | 0.44961  |

|    |          |          |          |
|----|----------|----------|----------|
| H  | 4.91825  | -3.02949 | 0.23539  |
| H  | 6.47485  | 0.97376  | 0.46851  |
| H  | 6.66035  | -1.44269 | 1.03802  |
| P  | -1.3506  | -0.59392 | 0.3461   |
| C  | -2.82662 | -1.02782 | -0.63958 |
| C  | -1.21618 | -1.86344 | 1.65563  |
| C  | -1.86526 | 0.92682  | 1.23277  |
| C  | -3.99468 | -1.49326 | -0.02298 |
| C  | -2.80674 | -0.82461 | -2.02359 |
| C  | -1.96314 | -1.78786 | 2.8402   |
| C  | -0.35355 | -2.94807 | 1.44936  |
| C  | -1.16405 | 1.32304  | 2.38138  |
| C  | -2.82866 | 1.78239  | 0.68999  |
| C  | -5.13239 | -1.74528 | -0.78434 |
| H  | -4.01257 | -1.66758 | 1.04881  |
| C  | -3.95023 | -1.07268 | -2.78083 |
| H  | -1.88741 | -0.50456 | -2.50397 |
| C  | -1.85018 | -2.78745 | 3.80372  |
| H  | -2.62107 | -0.94179 | 3.01746  |
| C  | -0.2479  | -3.94461 | 2.41722  |
| H  | 0.2164   | -3.014   | 0.52636  |
| C  | -1.44391 | 2.54361  | 2.98791  |
| H  | -0.39123 | 0.67827  | 2.78803  |
| C  | -3.09354 | 3.01198  | 1.29287  |
| H  | -3.36713 | 1.49308  | -0.20724 |
| C  | -5.11228 | -1.53145 | -2.16333 |
| H  | -6.03393 | -2.11238 | -0.30189 |
| H  | -3.92524 | -0.92253 | -3.85633 |
| C  | -0.99194 | -3.8666  | 3.5938   |
| H  | -2.43099 | -2.72062 | 4.71957  |
| H  | 0.42169  | -4.78328 | 2.24886  |
| C  | -2.40968 | 3.39222  | 2.44458  |
| H  | -0.90116 | 2.83617  | 3.88268  |
| H  | -3.83374 | 3.67459  | 0.85385  |
| H  | -6.00045 | -1.73194 | -2.75626 |
| H  | -0.90269 | -4.64408 | 4.34765  |
| H  | -2.61958 | 4.34983  | 2.91256  |
| Br | 0.40553  | -2.40115 | -2.13098 |
| C  | 3.00893  | 0.52725  | 2.6848   |
| H  | 3.07455  | 1.45811  | 3.255    |
| H  | 2.75885  | -0.30987 | 3.33561  |
| H  | 3.95625  | 0.34521  | 2.17162  |

### TS4(E)-(Z)

Energy: -2826552.1429218

|    |          |          |          |
|----|----------|----------|----------|
| Pd | 0.37345  | -0.83193 | -0.65743 |
| C  | 1.50076  | 0.43672  | 0.20911  |
| C  | 1.90211  | -0.04597 | 1.55611  |
| O  | 3.03563  | -0.36344 | 1.84871  |
| O  | 0.84478  | -0.14023 | 2.38294  |
| C  | 1.97629  | 1.71052  | -0.24017 |
| C  | 1.40690  | 2.28160  | -1.40180 |
| C  | 2.95258  | 2.44565  | 0.47306  |
| C  | 1.75544  | 3.56062  | -1.80196 |
| H  | 0.66592  | 1.70379  | -1.94547 |
| C  | 3.32451  | 3.71023  | 0.04502  |
| H  | 3.42635  | 1.99430  | 1.33807  |
| C  | 2.71577  | 4.27505  | -1.08003 |
| H  | 1.28612  | 4.00429  | -2.67424 |
| H  | 4.08424  | 4.26519  | 0.58736  |
| H  | 2.99767  | 5.27447  | -1.40034 |
| H  | 1.73983  | -2.57391 | -1.99327 |
| H  | 2.01846  | -0.91098 | -2.61582 |
| C  | 3.40649  | -1.55144 | -1.09578 |
| C  | 2.08186  | -1.57061 | -1.74454 |
| C  | 3.8037   | -2.60075 | -0.25153 |
| C  | 4.3066   | -0.49021 | -1.2948  |
| C  | 5.04857  | -2.59069 | 0.36915  |
| H  | 3.11356  | -3.42413 | -0.08209 |
| C  | 5.54924  | -0.47735 | -0.6713  |
| H  | 4.0179   | 0.331    | -1.94698 |
| C  | 5.92777  | -1.52774 | 0.16581  |
| H  | 5.33305  | -3.41459 | 1.01873  |
| H  | 6.22952  | 0.35324  | -0.84372 |
| H  | 6.89923  | -1.51832 | 0.65238  |
| P  | -1.64291 | 0.16086  | 0.13071  |
| C  | -3.10435 | -0.0274  | -0.94576 |
| C  | -2.15389 | -0.47291 | 1.76596  |
| C  | -1.50295 | 1.98405  | 0.30634  |
| C  | -4.39977 | 0.00772  | -0.41883 |
| C  | -2.91915 | -0.13024 | -2.32981 |
| C  | -2.69992 | 0.34177  | 2.76416  |
| C  | -1.96679 | -1.84114 | 2.00929  |
| C  | -0.71636 | 2.53044  | 1.33202  |
| C  | -2.0346  | 2.83841  | -0.66729 |
| C  | -5.50011 | -0.05529 | -1.27107 |
| H  | -4.54873 | 0.07657  | 0.6549   |
| C  | -4.0223  | -0.18013 | -3.17794 |
| H  | -1.91381 | -0.19918 | -2.73369 |

|    |          |          |          |   |          |          |          |
|----|----------|----------|----------|---|----------|----------|----------|
| C  | -3.04537 | -0.20487 | 4.00007  | H | 2.76643  | 2.13179  | -1.78751 |
| H  | -2.84899 | 1.40186  | 2.58183  | C | 3.53373  | 0.33604  | -0.86808 |
| C  | -2.32253 | -2.38112 | 3.24219  | C | 2.39374  | 1.19406  | -1.35809 |
| H  | -1.54731 | -2.47213 | 1.2289   | C | 3.53719  | -1.04622 | -1.07947 |
| C  | -0.46642 | 3.89809  | 1.37802  | C | 4.58326  | 0.91896  | -0.15106 |
| H  | -0.28486 | 1.87596  | 2.08272  | C | 4.56453  | -1.83451 | -0.56669 |
| C  | -1.77479 | 4.20796  | -0.62121 | H | 2.72351  | -1.50562 | -1.63874 |
| H  | -2.65036 | 2.43603  | -1.46565 | C | 5.61299  | 0.13007  | 0.36018  |
| C  | -5.31266 | -0.14499 | -2.64993 | H | 4.57961  | 1.99115  | 0.02659  |
| H  | -6.50416 | -0.03645 | -0.85657 | C | 5.60392  | -1.24982 | 0.15684  |
| H  | -3.87237 | -0.268   | -4.25006 | H | 4.55386  | -2.90759 | -0.73676 |
| C  | -2.85608 | -1.56511 | 4.24138  | H | 6.42174  | 0.59507  | 0.91718  |
| H  | -3.46544 | 0.43371  | 4.77234  | H | 6.40612  | -1.86504 | 0.55491  |
| H  | -2.17602 | -3.44209 | 3.42389  | P | -1.19863 | -0.56641 | 0.41116  |
| C  | -0.98872 | 4.74158  | 0.39703  | C | -2.81994 | -1.08552 | -0.26115 |
| H  | 0.15117  | 4.30357  | 2.17435  | C | -0.5764  | -1.96198 | 1.41615  |
| H  | -2.19178 | 4.85719  | -1.38621 | C | -1.65185 | 0.7367   | 1.61418  |
| H  | -6.17226 | -0.19695 | -3.31244 | C | -3.65819 | -1.95706 | 0.44311  |
| H  | -3.12556 | -1.98894 | 5.20495  | C | -3.24792 | -0.546   | -1.48019 |
| H  | -0.78321 | 5.80778  | 0.42795  | C | -1.05111 | -2.21926 | 2.70984  |
| Br | -0.93009 | -2.80292 | -1.52943 | C | 0.41076  | -2.79084 | 0.86769  |
| C  | 1.08167  | -0.76614 | 3.64915  | C | -0.89938 | 0.95782  | 2.77672  |
| H  | 1.80231  | -0.19111 | 4.23735  | C | -2.71623 | 1.59888  | 1.31951  |
| H  | 0.1079   | -0.79431 | 4.13712  | C | -4.91403 | -2.27878 | -0.06554 |
| H  | 1.46544  | -1.77845 | 3.50116  | H | -3.3291  | -2.39752 | 1.37893  |

### Int-5(Z)

Energy: -2826591.9841443

|    |          |          |          |   |          |          |          |
|----|----------|----------|----------|---|----------|----------|----------|
| Pd | 0.24412  | -0.03257 | -1.21795 | H | -2.58239 | 0.09853  | -2.04712 |
| C  | 1.28001  | 1.52192  | -0.33674 | C | -0.5377  | -3.28521 | 3.4464   |
| C  | 1.78214  | 1.32618  | 1.07092  | H | -1.8093  | -1.57867 | 3.15093  |
| O  | 2.17674  | 2.20658  | 1.80546  | C | 0.91918  | -3.85516 | 1.60752  |
| O  | 1.81375  | 0.02167  | 1.39784  | H | 0.77862  | -2.59318 | -0.135   |
| C  | 0.49163  | 2.75319  | -0.61299 | C | -1.21501 | 2.01034  | 3.63178  |
| C  | 0.29446  | 3.18346  | -1.94198 | H | -0.07217 | 0.30186  | 3.01723  |
| C  | -0.15620 | 3.46942  | 0.40741  | C | -3.02925 | 2.64934  | 2.17819  |
| C  | -0.51977 | 4.27210  | -2.23428 | H | -3.30308 | 1.44945  | 0.41865  |
| H  | 0.76667  | 2.65594  | -2.76571 | C | -5.34309 | -1.72822 | -1.27297 |
| C  | -0.96476 | 4.56152  | 0.11047  | H | -5.55596 | -2.96422 | 0.48066  |
| H  | -0.02235 | 3.17578  | 1.44005  | H | -4.83137 | -0.44391 | -2.92764 |
| C  | -1.15593 | 4.97001  | -1.20789 | C | 0.4504   | -4.1021  | 2.89806  |
| H  | -0.65516 | 4.57553  | -3.26874 | H | -0.90863 | -3.47365 | 4.44995  |
| H  | -1.45266 | 5.09082  | 0.92400  | H | 1.68785  | -4.48855 | 1.1744   |
| H  | -1.78914 | 5.8232   | -1.43441 | C | -2.28131 | 2.85906  | 3.33538  |
| H  | 1.93608  | 0.67855  | -2.25421 | H | -0.62049 | 2.16945  | 4.52653  |
|    |          |          |          | H | -3.85632 | 3.3098   | 1.93494  |
|    |          |          |          | H | -6.32228 | -1.98337 | -1.66856 |
|    |          |          |          | H | 0.85408  | -4.92911 | 3.47563  |
|    |          |          |          | H | -2.52534 | 3.68116  | 4.00213  |

|    |         |          |          |
|----|---------|----------|----------|
| Br | -0.2168 | -1.8008  | -2.87618 |
| C  | 2.53202 | -0.33137 | 2.5815   |
| H  | 2.26036 | 0.32269  | 3.41439  |
| H  | 2.25588 | -1.36592 | 2.78683  |
| H  | 3.60556 | -0.24995 | 2.38985  |

### TS5-6(Z)

Energy: -2826574.9929574

|    |          |          |          |
|----|----------|----------|----------|
| Pd | -0.55981 | -0.54864 | -1.18168 |
| C  | -1.45002 | 1.26246  | -0.38173 |
| C  | -1.83590 | 1.09783  | 1.06812  |
| O  | -2.13628 | 2.00418  | 1.81407  |
| O  | -1.90304 | -0.19597 | 1.42815  |
| C  | -0.69096 | 2.49021  | -0.79306 |
| C  | 0.23228  | 2.41907  | -1.84762 |
| C  | -0.87157 | 3.72407  | -0.15168 |
| C  | 0.98514  | 3.52742  | -2.22308 |
| H  | 0.39117  | 1.46687  | -2.34929 |
| C  | -0.12075 | 4.83409  | -0.53363 |
| H  | -1.57296 | 3.79859  | 0.66862  |
| C  | 0.81793  | 4.74223  | -1.55970 |
| H  | 1.71408  | 3.43109  | -3.02246 |
| H  | -0.26828 | 5.77723  | -0.01422 |
| H  | 1.41153  | 5.60752  | -1.84116 |
| H  | -2.40163 | 1.15659  | -2.28375 |
| H  | -1.59049 | -0.81736 | -2.31394 |
| C  | -3.63413 | 0.01486  | -0.87826 |
| C  | -2.34982 | 0.65737  | -1.31587 |
| C  | -4.58003 | 0.84038  | -0.25394 |
| C  | -3.9381  | -1.33537 | -1.07311 |
| C  | -5.80205 | 0.3231   | 0.17068  |
| H  | -4.3474  | 1.8887   | -0.08769 |
| C  | -5.16284 | -1.84964 | -0.65189 |
| H  | -3.19923 | -1.988   | -1.52908 |
| C  | -6.09752 | -1.02492 | -0.0278  |
| H  | -6.52156 | 0.97578  | 0.65729  |
| H  | -5.38105 | -2.9028  | -0.80558 |
| H  | -7.04896 | -1.43049 | 0.30471  |
| P  | 1.29751  | -0.35467 | 0.3404   |
| C  | 1.59439  | -1.94815 | 1.1847   |
| C  | 2.86216  | 0.12401  | -0.48119 |
| C  | 1.19167  | 0.83467  | 1.7347   |
| C  | 2.86796  | -2.37624 | 1.5679   |
| C  | 0.47532  | -2.73237 | 1.49549  |
| C  | 3.93853  | 0.63976  | 0.25677  |

|    |          |          |          |
|----|----------|----------|----------|
| C  | 2.98711  | -0.01161 | -1.86937 |
| C  | 1.42805  | 2.19797  | 1.50759  |
| C  | 0.79179  | 0.41565  | 3.01039  |
| C  | 3.01962  | -3.57382 | 2.26471  |
| H  | 3.74238  | -1.7861  | 1.31168  |
| C  | 0.63076  | -3.92063 | 2.20343  |
| H  | -0.50904 | -2.41219 | 1.16596  |
| C  | 5.11851  | 1.00869  | -0.3838  |
| H  | 3.84686  | 0.76919  | 1.33131  |
| C  | 4.16862  | 0.36291  | -2.50596 |
| H  | 2.16816  | -0.42973 | -2.44611 |
| C  | 1.25637  | 3.1211   | 2.53538  |
| H  | 1.74498  | 2.5423   | 0.52811  |
| C  | 0.62038  | 1.34438  | 4.03383  |
| H  | 0.61428  | -0.6376  | 3.20343  |
| C  | 1.90325  | -4.34339 | 2.58821  |
| H  | 4.01316  | -3.90716 | 2.55124  |
| H  | -0.24008 | -4.5267  | 2.43706  |
| C  | 5.23445  | 0.87344  | -1.76714 |
| H  | 5.94487  | 1.40732  | 0.19807  |
| H  | 4.25367  | 0.25203  | -3.58326 |
| C  | 0.84824  | 2.6994   | 3.79854  |
| H  | 1.43062  | 4.17422  | 2.3362   |
| H  | 0.31092  | 1.00581  | 5.01893  |
| H  | 2.02545  | -5.2772  | 3.13001  |
| H  | 6.15353  | 1.16682  | -2.267   |
| H  | 0.708    | 3.42258  | 4.59686  |
| Br | 0.44869  | -2.60069 | -2.08782 |
| C  | -2.51967 | -0.44661 | 2.69443  |
| H  | -3.57773 | -0.17333 | 2.64969  |
| H  | -2.40853 | -1.51724 | 2.86404  |
| H  | -2.02268 | 0.12539  | 3.48085  |

### TS5(Z)-5η<sup>3</sup>

Energy: -2826588.8459255

|    |          |          |          |
|----|----------|----------|----------|
| Pd | 0.27134  | -0.81548 | -0.87034 |
| C  | -0.60244 | -1.98775 | 0.61690  |
| C  | -1.14869 | -1.48869 | 1.92779  |
| O  | -1.01751 | -2.03787 | 3.00142  |
| O  | -1.91358 | -0.40079 | 1.74215  |
| C  | 0.69394  | -2.69750 | 0.65225  |
| C  | 1.13109  | -3.41652 | -0.49197 |
| C  | 1.62915  | -2.49853 | 1.70034  |
| C  | 2.44658  | -3.87737 | -0.59100 |
| H  | 0.45257  | -3.64192 | -1.30740 |





|    |          |          |          |
|----|----------|----------|----------|
| P  | 1.47791  | -0.45754 | -0.17497 |
| C  | 2.76168  | 0.80764  | 0.11501  |
| C  | 2.23669  | -2.0792  | 0.21007  |
| C  | 1.35412  | -0.52618 | -2.00514 |
| C  | 4.1277   | 0.5148   | 0.17137  |
| C  | 2.33052  | 2.13474  | 0.23931  |
| C  | 3.13956  | -2.68605 | -0.67689 |
| C  | 1.90911  | -2.72731 | 1.40742  |
| C  | 0.6365   | -1.58684 | -2.58108 |
| C  | 1.8521   | 0.48559  | -2.83279 |
| C  | 5.05291  | 1.54333  | 0.34006  |
| H  | 4.46872  | -0.51332 | 0.09657  |
| C  | 3.25948  | 3.1598   | 0.39061  |
| H  | 1.27002  | 2.36526  | 0.22415  |
| C  | 3.71106  | -3.91671 | -0.36522 |
| H  | 3.38677  | -2.19868 | -1.61597 |
| C  | 2.4833   | -3.96036 | 1.7128   |
| H  | 1.2223   | -2.25832 | 2.10521  |
| C  | 0.4094   | -1.62416 | -3.95412 |
| H  | 0.2575   | -2.38596 | -1.94804 |
| C  | 1.62436  | 0.44416  | -4.20837 |
| H  | 2.40687  | 1.31214  | -2.4004  |
| C  | 4.62173  | 2.86563  | 0.44358  |
| H  | 6.1127   | 1.30995  | 0.39363  |
| H  | 2.91218  | 4.18485  | 0.4815   |
| C  | 3.38282  | -4.556   | 0.83076  |
| H  | 4.40957  | -4.37784 | -1.05805 |
| H  | 2.22276  | -4.45461 | 2.64433  |
| C  | 0.89825  | -0.60356 | -4.77179 |
| H  | -0.14654 | -2.45183 | -4.38624 |
| H  | 2.01788  | 1.23542  | -4.84071 |
| H  | 5.34667  | 3.66431  | 0.57504  |
| H  | 3.82629  | -5.51826 | 1.07182  |
| H  | 0.71925  | -0.63026 | -5.84289 |
| Br | 0.74173  | 0.27944  | 3.15646  |
| C  | -5.7136  | 1.49686  | 0.05831  |
| H  | -5.77318 | 2.50937  | 0.46591  |
| H  | -6.3564  | 1.39245  | -0.81524 |
| H  | -6.00225 | 0.78258  | 0.83454  |

## References

1. S. S. Zaleskiy and V. P. Ananikov, *Organometallics*, 2012, **31**, 2302.
2. W.-Y. Yu, Y.-T. Tsoi, Z. Zhou and A. S. C. Chan, *Org. Lett.*, 2009, **11**, 469.
3. D. Halilovic, M. Budanović, Z. R. Wong, R. D. Webster, J. Huh and M. C. Stuparu, *J. Org. Chem.*, 2018, **83**, 3529.
4. N. S. Mani, C. M. Mapes, J. Wu, X. Deng and T. K. Jones, *J. Org. Chem.*, 2006, **71**, 5039.
5. C. Peng, Y. Wang and J. Wang, *J. Am. Chem. Soc.*, 2008, **130**, 1566.
6. P. Ykman, G. L'Abbé and G. Smets, *Tetrahedron*, 1973, **29**, 195.
7. W. Liu, J. Twilton, B. Wei, M. Lee, M. N. Hopkins, J. Bacsá, S. S. Stahl and H. M. L. Davies, *ACS Catal.*, 2021, **11**, 2676.
8. V. A. Nikolaev, V. M. Zakharova, L. Hennig and J. Sieler, *J. Fluor. Chem.*, 2007, **128**, 507.
9. G. Märkl, *Tetrahedron Lett.*, 1961, **2**, 811.
10. H. J. Bestmann and H. Schulz, *Justus Liebigs Ann. Chem.*, 1964, **674**, 11.
11. G. Mann, Q. Shelby, A. H. Roy and J. F. Hartwig, *Organometallics*, 2003, **22**, 2775.
12. Y. Guo, T. V. Nguyen and R. M. Koenigs, *Org. Lett.*, 2019, **21**, 8814.
13. D. L. Ventura and R. W. Kubiak, *Tetrahedron Lett.*, 2014, **55**, 2715.
14. M.-L. Wang, C.-J. Lin and J.-J. Jwo, *Chem. Eng. Commun.*, 1989, **79**, 189.
15. M. L. Wang, S. R. Lay and J. J. Jwo, *J. Chin. Inst. Eng.*, 1989, **12**, 293.
16. J. J. Kiddle, *Tetrahedron Lett.*, 2000, **41**, 1339.
17. Q. Sha, Y. Ling, W. Wang and Y. Wei, *Adv. Synth. Catal.*, 2013, **355**, 2145.
18. J. Burés, *Angew. Chem. Int. Ed.*, 2016, **55**, 2028.
19. J. Burés, *Top. Catal.*, 2017, **60**, 631.
20. J. M. Hoover, B. L. Ryland and S. S. Stahl, *J. Am. Chem. Soc.*, 2013, **135**, 2357.
21. D. Whitaker, J. Burés and I. Larrosa, *J. Am. Chem. Soc.*, 2016, **138**, 8384.
22. C. Amatore, A. Jutand, F. Khalil, M. A. M'Barki and L. Mottier, *Organometallics*, 1993, **12**, 3168.
23. C. Amatore and A. Jutand, *Coord. Chem. Rev.*, 1998, **178-180**, 511.
24. Y. Macé, A. R. Kapdi, I. J. S. Fairlamb and A. Jutand, *Organometallics*, 2006, **25**, 1795.
25. A. de Gombert, A. I. McKay, C. J. Davis, K. M. Wheelhouse and M. C. Willis, *J. Am. Chem. Soc.*, 2020, **142**, 3564.
26. D. Willcox, R. Nouch, A. Kingsbury, D. Robinson, J. V. Carey, S. Brough and S. Woodward, *ACS Catal.*, 2017, **7**, 6901.
27. E. A. Mitchell and M. C. Baird, *Organometallics*, 2007, **26**, 5230.
28. B. M. M. Wheatley and B. A. Keay, *J. Org. Chem.*, 2007, **72**, 7253.
29. D. Mc Cartney and P. J. Guiry, *Chem. Soc. Rev.*, 2011, **40**, 5122.
30. I. P. Beletskaya and A. V. Cheprakov, *Chem. Rev.*, 2000, **100**, 3009.
31. J. S. McIndoe and K. L. Vikse, *J. Mass. Spectrom.*, 2019, **54**, 466.
32. A. Joshi, C. Killeen, T. Thiessen, H. S. Zijlstra and J. S. McIndoe, *J Mass Spectrom*, 2022, **57**, e4807.
33. A. D. Becke, *J. Chem. Phys.*, 1996, **104**, 1040.
34. J. P. Perdew, J. A. Chevary, S. H. Vosko, K. A. Jackson, M. R. Pederson, D. J. Singh and C. Fiolhais, *Phys. Rev. B.*, 1992, **46**, 6671.
35. J. P. Perdew, K. Burke and Y. Wang, *Phys. Rev. B.*, 1996, **54**, 16533.
36. A. Bergner, M. Dolg, W. Küchle, H. Stoll and H. Preuß, *Mol. Phys.*, 1993, **80**, 1431.
37. S. Grimme, J. Antony, S. Ehrlich and H. Krieg, *J. Chem. Phys.*, 2010, **132**, 154104.
38. J. Tomasi, B. Mennucci and E. Cancès, *J. Mol. Struct.*, 1999, **464**, 211.
39. E. R. Johnson, S. Keinan, P. Mori-Sánchez, J. Contreras-García, A. J. Cohen and W. Yang, *J. Am. Chem. Soc.*, 2010, **132**, 6498.
40. R. S. Paton, <https://gist.github.com/bobbypaton>, (accessed 30/06/2022).
